# Supplementary material for: Genome-Wide Signatures of Transcription Factor Activity: Connecting Transcription Factors, Disease, and Small Molecules
Source: PLoS Comput Biol. 2013 Sep 5;9(9):e1003198. doi: 10.1371/journal.pcbi.1003198 (PMC3764016; doi:10.1371/journal.pcbi.1003198)
Supplement: Table S3 — Results of the concordance analysis between E2+CHX and E2 differential gene expression profiles and all ENCODE TREG binding profiles. (XLSX) [file pcbi.1003198.s008.xlsx]

## Sheet: ENCODE
signatureID	file	peak	type	composite	cell	antibody	target	targetLinkValue	label	treatment	factorGrouping1	grsScaledE2ChxVsEncodePvalue	grsScaledE2VsEncodePvalue
T-47D::ERalpha_a::Estradiol_10nM::broadPeak	wgEncodeHaibTfbsT47dEralphaaV0416102Est10nm1hPkRep1	NA	broadPeak	wgEncodeHaibTfbs	T-47D	ERalpha_a	ERalpha_a	ESR1	ERalpha a (sc-543)	Estradiol_10nM	T-47D::ERalpha_a::Estradiol_10nM::broadPeak	3.79242e-158	1.47427e-18
T-47D::ERalpha_a::Genistein_100nM::broadPeak	wgEncodeHaibTfbsT47dEralphaaPcr2xGen1hPkRep1	NA	broadPeak	wgEncodeHaibTfbs	T-47D	ERalpha_a	ERalpha_a	ESR1	ERalpha a (sc-543)	Genistein_100nM	T-47D::ERalpha_a::Genistein_100nM::broadPeak	1.83831e-141	6.07141e-14
T-47D::ERalpha_a::BPA_100nM::broadPeak	wgEncodeHaibTfbsT47dEraaV0416102Bpa1hPkRep1	NA	broadPeak	wgEncodeHaibTfbs	T-47D	ERalpha_a	ERalpha_a	ESR1	ERalpha a (sc-543)	BPA_100nM	T-47D::ERalpha_a::BPA_100nM::broadPeak	4.52503e-113	1.41011e-11
ECC-1::ERalpha_a::Estradiol_10nM::broadPeak	wgEncodeHaibTfbsEcc1EralphaaV0416102Est10nm1hPkRep1	NA	broadPeak	wgEncodeHaibTfbs	ECC-1	ERalpha_a	ERalpha_a	ESR1	ERalpha a (sc-543)	Estradiol_10nM	ECC-1::ERalpha_a::Estradiol_10nM::broadPeak	2.49698e-82	1.14992e-08
ECC-1::ERalpha_a::Genistein_100nM::broadPeak	wgEncodeHaibTfbsEcc1EralphaaV0416102Gen1hPkRep1	NA	broadPeak	wgEncodeHaibTfbs	ECC-1	ERalpha_a	ERalpha_a	ESR1	ERalpha a (sc-543)	Genistein_100nM	ECC-1::ERalpha_a::Genistein_100nM::broadPeak	9.60809e-58	6.96902e-08
MCF-7::GATA3::None::narrowPeak	wgEncodeSydhTfbsMcf7Gata3UcdPk	peak	narrowPeak	wgEncodeSydhTfbs	MCF-7	GATA3_(SC-268)	GATA3	GATA3	GATA3 (sc-268)	None	MCF-7::GATA3::None::narrowPeak	4.03314e-53	1.10579e-34
MCF-7::ZNF217::None::narrowPeak	wgEncodeSydhTfbsMcf7Znf217UcdPk	peak	narrowPeak	wgEncodeSydhTfbs	MCF-7	ZNF217	ZNF217	ZNF217	ZNF217 (ZNF217)	None	MCF-7::ZNF217::None::narrowPeak	7.56546e-47	1.88429e-36
HeLa-S3::SMC3::None::narrowPeak	wgEncodeSydhTfbsHelas3Smc3ab9263IggrabPk	peak	narrowPeak	wgEncodeSydhTfbs	HeLa-S3	SMC3_(ab9263)	SMC3	SMC3	SMC3 (ab9263)	None	HeLa-S3::SMC3::None::narrowPeak	1.12939e-40	1.19706e-155
HeLa-S3::MAZ::None::narrowPeak	wgEncodeSydhTfbsHelas3Mazab85725IggrabPk	peak	narrowPeak	wgEncodeSydhTfbs	HeLa-S3	MAZ_(ab85725)	MAZ	MAZ	MAZ (ab85725)	None	HeLa-S3::MAZ::None::narrowPeak	1.7117e-40	4.3927e-190
MCF-7::HA-E2F1::None::narrowPeak	wgEncodeSydhTfbsMcf7Hae2f1UcdPk	peak	narrowPeak	wgEncodeSydhTfbs	MCF-7	HA-E2F1	HA-E2F1	E2F1	HA-E2F1 (MMS-101P)	None	MCF-7::HA-E2F1::None::narrowPeak	2.14147e-39	3.53152e-187
HeLa-S3::COREST::None::narrowPeak	wgEncodeSydhTfbsHelas3Corestsc30189IggrabPk	peak	narrowPeak	wgEncodeSydhTfbs	HeLa-S3	COREST_(sc-30189)	COREST	RCOR1	COREST (sc30189)	None	HeLa-S3::COREST::None::narrowPeak	4.00755e-38	5.86611e-176
HepG2::HDAC2::None::broadPeak	wgEncodeHaibTfbsHepg2Hdac2sc6296V0416101PkRep1	NA	broadPeak	wgEncodeHaibTfbs	HepG2	HDAC2_(SC-6296)	HDAC2	HDAC2	HDAC2 (sc-6296)	None	HepG2::HDAC2::None::broadPeak	1.89373e-37	7.6241e-78
MCF-7::c-Myc::vehicle::narrowPeak	wgEncodeOpenChromChipMcf7CmycVehPkRep1	peak	narrowPeak	wgEncodeOpenChromChip	MCF-7	c-Myc	c-Myc	MYC	c-Myc (sc-764)	vehicle	MCF-7::c-Myc::vehicle::narrowPeak	3.61692e-37	4.19904e-179
HeLa-S3::CHD2::None::narrowPeak	wgEncodeSydhTfbsHelas3Chd2IggrabPk	peak	narrowPeak	wgEncodeSydhTfbs	HeLa-S3	CHD2_(AB68301)	CHD2	CHD2	CHD2 (ab68301)	None	HeLa-S3::CHD2::None::narrowPeak	8.90556e-37	1.09719e-193
HeLa-S3::RFX5::None::narrowPeak	wgEncodeSydhTfbsHelas3Rfx5200401194IggrabPk	peak	narrowPeak	wgEncodeSydhTfbs	HeLa-S3	RFX5_(200-401-194)	RFX5	RFX5	RFX5 (200-401-194)	None	HeLa-S3::RFX5::None::narrowPeak	1.05232e-36	1.27207e-186
HeLa-S3::HA-E2F1::None::narrowPeak	wgEncodeSydhTfbsHelas3Hae2f1StdPk	peak	narrowPeak	wgEncodeSydhTfbs	HeLa-S3	HA-E2F1	HA-E2F1	E2F1	HA-E2F1 (MMS-101P)	None	HeLa-S3::HA-E2F1::None::narrowPeak	8.15818e-36	9.51602e-117
HeLa-S3::ZKSCAN1::None::narrowPeak	wgEncodeSydhTfbsHelas3Zkscan1hpa006672IggrabPk	peak	narrowPeak	wgEncodeSydhTfbs	HeLa-S3	ZKSCAN1_(HPA006672)	ZKSCAN1	ZKSCAN1	ZKSCAN1 (HPA006672)	None	HeLa-S3::ZKSCAN1::None::narrowPeak	1.4068e-35	7.42672e-170
HeLa-S3::Mxi1::None::narrowPeak	wgEncodeSydhTfbsHelas3Mxi1af4185IggrabPk	peak	narrowPeak	wgEncodeSydhTfbs	HeLa-S3	Mxi1_(AF4185)	Mxi1	MXI1	Mxi1 (AF4185)	None	HeLa-S3::Mxi1::None::narrowPeak	2.76892e-35	3.52479e-194
MCF10A-Er-Src::c-Myc::EtOH_0.01pct::narrowPeak	wgEncodeSydhTfbsMcf10aesCmycEtoh01HvdPk	peak	narrowPeak	wgEncodeSydhTfbs	MCF10A-Er-Src	c-Myc	c-Myc	MYC	c-Myc (sc-764)	EtOH_0.01pct	MCF10A-Er-Src::c-Myc::EtOH_0.01pct::narrowPeak	1.29234e-34	1.74718e-148
HeLa-S3::RAD21::None::narrowPeak	wgEncodeSydhTfbsHelas3Rad21IggrabPk	peak	narrowPeak	wgEncodeSydhTfbs	HeLa-S3	Rad21	RAD21	RAD21	RAD21 (ab992)	None	HeLa-S3::RAD21::None::narrowPeak	1.3094e-34	7.15982e-63
ECC-1::ERalpha_a::BPA_100nM::broadPeak	wgEncodeHaibTfbsEcc1EraaV0416102Bpa1hPkRep1	NA	broadPeak	wgEncodeHaibTfbs	ECC-1	ERalpha_a	ERalpha_a	ESR1	ERalpha a (sc-543)	BPA_100nM	ECC-1::ERalpha_a::BPA_100nM::broadPeak	2.12335e-33	0.00138763
HepG2::MAZ::None::narrowPeak	wgEncodeSydhTfbsHepg2Mazab85725IggrabPk	peak	narrowPeak	wgEncodeSydhTfbs	HepG2	MAZ_(ab85725)	MAZ	MAZ	MAZ (ab85725)	None	HepG2::MAZ::None::narrowPeak	2.35378e-33	2.01475e-140
HepG2::Max::None::narrowPeak	wgEncodeSydhTfbsHepg2MaxIggrabPk	peak	narrowPeak	wgEncodeSydhTfbs	HepG2	Max	Max	MAX	Max (sc-197)	None	HepG2::Max::None::narrowPeak	3.30222e-33	2.63598e-150
K562::E2F6::None::broadPeak	wgEncodeHaibTfbsK562E2f6V0416102PkRep1	NA	broadPeak	wgEncodeHaibTfbs	K562	E2F6	E2F6	E2F6	E2F6 (sc-22823)	None	K562::E2F6::None::broadPeak	2.40107e-32	1.53726e-153
HeLa-S3::Max::None::narrowPeak	wgEncodeSydhTfbsHelas3MaxIggrabPk	peak	narrowPeak	wgEncodeSydhTfbs	HeLa-S3	Max	Max	MAX	Max (sc-197)	None	HeLa-S3::Max::None::narrowPeak	2.72606e-31	6.85156e-159
T-47D::FOXA1::DMSO_0.02pct::broadPeak	wgEncodeHaibTfbsT47dFoxa1sc6553V0416102Dm002p1hPkRep1	NA	broadPeak	wgEncodeHaibTfbs	T-47D	FOXA1_(SC-6553)	FOXA1	FOXA1	FOXA1 (sc-6553)	DMSO_0.02pct	T-47D::FOXA1::DMSO_0.02pct::broadPeak	3.23631e-31	9.5356e-97
HeLa-S3::Znf143::None::narrowPeak	wgEncodeSydhTfbsHelas3Znf143IggrabPk	peak	narrowPeak	wgEncodeSydhTfbs	HeLa-S3	Znf143_(16618-1-AP)	Znf143	ZNF143	Znf143 (16618-1-AP)	None	HeLa-S3::Znf143::None::narrowPeak	8.4214e-31	2.0924e-159
MCF10A-Er-Src::E2F4::4OHTAM_1uM_36hr::narrowPeak	wgEncodeSydhTfbsMcf10aesE2f4TamHvdPk	peak	narrowPeak	wgEncodeSydhTfbs	MCF10A-Er-Src	E2F4	E2F4	E2F4	E2F4 (sc-866)	4OHTAM_1uM_36hr	MCF10A-Er-Src::E2F4::4OHTAM_1uM_36hr::narrowPeak	8.65524e-31	3.55883e-151
HepG2::CHD2::None::narrowPeak	wgEncodeSydhTfbsHepg2Chd2ab68301IggrabPk	peak	narrowPeak	wgEncodeSydhTfbs	HepG2	CHD2_(AB68301)	CHD2	CHD2	CHD2 (ab68301)	None	HepG2::CHD2::None::narrowPeak	1.33091e-30	2.41135e-147
K562::UBTF::None::narrowPeak	wgEncodeSydhTfbsK562Ubtfsab1404509IggmusPk	peak	narrowPeak	wgEncodeSydhTfbs	K562	UBTF_(SAB1404509)	UBTF	UBTF	UBTF (SAB1404509)	None	K562::UBTF::None::narrowPeak	1.42564e-30	1.81421e-118
T-47D::GATA3::DMSO_0.02pct::broadPeak	wgEncodeHaibTfbsT47dGata3sc268V0416102Dm002p1hPkRep1	NA	broadPeak	wgEncodeHaibTfbs	T-47D	GATA3_(SC-268)	GATA3	GATA3	GATA3 (sc-268)	DMSO_0.02pct	T-47D::GATA3::DMSO_0.02pct::broadPeak	2.71509e-30	1.48176e-54
HeLa-S3::INI1::None::narrowPeak	wgEncodeSydhTfbsHelas3Ini1IggmusPk	peak	narrowPeak	wgEncodeSydhTfbs	HeLa-S3	Ini1	INI1	SMARCB1	INI1 (sc-16189)	None	HeLa-S3::INI1::None::narrowPeak	7.20069e-30	2.57501e-123
HeLa-S3::CEBPB::None::narrowPeak	wgEncodeSydhTfbsHelas3CebpbIggrabPk	peak	narrowPeak	wgEncodeSydhTfbs	HeLa-S3	CEBPB	CEBPB	CEBPB	CEBPB (sc-150)	None	HeLa-S3::CEBPB::None::narrowPeak	1.215e-29	1.69769e-134
A549::Max::None::narrowPeak	wgEncodeSydhTfbsA549MaxIggrabPk	peak	narrowPeak	wgEncodeSydhTfbs	A549	Max	Max	MAX	Max (sc-197)	None	A549::Max::None::narrowPeak	1.24679e-29	1.57747e-146
H1-hESC::Bach1::None::narrowPeak	wgEncodeSydhTfbsH1hescBach1sc14700IggrabPk	peak	narrowPeak	wgEncodeSydhTfbs	H1-hESC	Bach1_(sc-14700)	Bach1	BACH1	Bach1 (sc-14700)	None	H1-hESC::Bach1::None::narrowPeak	2.48082e-29	1.13138e-63
HepG2::COREST::None::narrowPeak	wgEncodeSydhTfbsHepg2Corestsc30189IggrabPk	peak	narrowPeak	wgEncodeSydhTfbs	HepG2	COREST_(sc-30189)	COREST	RCOR1	COREST (sc30189)	None	HepG2::COREST::None::narrowPeak	5.26901e-29	1.03505e-126
T-47D::P300::DMSO_0.02pct::broadPeak	wgEncodeHaibTfbsT47dP300V0416102Dm002p1hPkRep1	NA	broadPeak	wgEncodeHaibTfbs	T-47D	p300	P300	EP300	P300 (sc-585)	DMSO_0.02pct	T-47D::P300::DMSO_0.02pct::broadPeak	7.43443e-29	6.12287e-55
K562::CCNT2::None::narrowPeak	wgEncodeSydhTfbsK562Ccnt2StdPk	peak	narrowPeak	wgEncodeSydhTfbs	K562	CCNT2	CCNT2	CCNT2	CCNT2 (sc-12419)	None	K562::CCNT2::None::narrowPeak	1.69153e-28	4.11709e-138
K562::HMGN3::None::narrowPeak	wgEncodeSydhTfbsK562Hmgn3StdPk	peak	narrowPeak	wgEncodeSydhTfbs	K562	HMGN3	HMGN3	HMGN3	HMGN3 (NB100-61076)	None	K562::HMGN3::None::narrowPeak	2.75067e-28	6.5568e-132
HeLa-S3::AP-2gamma::None::narrowPeak	wgEncodeSydhTfbsHelas3Ap2gammaStdPk	peak	narrowPeak	wgEncodeSydhTfbs	HeLa-S3	AP-2gamma	AP-2gamma	GTFAP2C	AP-2gamma (sc-8977)	None	HeLa-S3::AP-2gamma::None::narrowPeak	4.0952e-28	2.43819e-36
MCF10A-Er-Src::c-Myc::4OHTAM_1uM_4hr::narrowPeak	wgEncodeSydhTfbsMcf10aesCmycTam14hHvdPk	peak	narrowPeak	wgEncodeSydhTfbs	MCF10A-Er-Src	c-Myc	c-Myc	MYC	c-Myc (sc-764)	4OHTAM_1uM_4hr	MCF10A-Er-Src::c-Myc::4OHTAM_1uM_4hr::narrowPeak	1.30396e-27	4.61761e-119
K562::MAZ::None::narrowPeak	wgEncodeSydhTfbsK562Mazab85725IggrabPk	peak	narrowPeak	wgEncodeSydhTfbs	K562	MAZ_(ab85725)	MAZ	MAZ	MAZ (ab85725)	None	K562::MAZ::None::narrowPeak	1.69396e-27	2.20809e-113
HEK293-T-REx::ZNF263::None::narrowPeak	wgEncodeSydhTfbsHek293tZnf263UcdPk	peak	narrowPeak	wgEncodeSydhTfbs	HEK293-T-REx	ZNF263	ZNF263	ZNF263	ZNF263 (H00010127-A01)	None	HEK293-T-REx::ZNF263::None::narrowPeak	1.8718e-27	1.05441e-70
H1-hESC::SIN3A::None::narrowPeak	wgEncodeSydhTfbsH1hescSin3anb6001263IggrabPk	peak	narrowPeak	wgEncodeSydhTfbs	H1-hESC	SIN3A_(NB600-1263)	SIN3A	SIN3A	SIN3A (NB600-1263)	None	H1-hESC::SIN3A::None::narrowPeak	3.72711e-27	4.72041e-97
K562::UBF::None::narrowPeak	wgEncodeSydhTfbsK562Ubfsc13125IggmusPk	peak	narrowPeak	wgEncodeSydhTfbs	K562	UBF_(sc-13125)	UBF	UBTF	UBF (sc-13125)	None	K562::UBF::None::narrowPeak	1.3294e-26	2.02209e-123
K562::E2F6::None::narrowPeak	wgEncodeSydhTfbsK562E2f6UcdPk	peak	narrowPeak	wgEncodeSydhTfbs	K562	E2F6	E2F6	E2F6	E2F6 (sc-22823)	None	K562::E2F6::None::narrowPeak	2.52833e-26	9.1434e-131
HepG2::P300::None::narrowPeak	wgEncodeSydhTfbsHepg2P300sc582IggrabPk	peak	narrowPeak	wgEncodeSydhTfbs	HepG2	p300_(SC-584)	P300	EP300	P300 (sc-584)	None	HepG2::P300::None::narrowPeak	2.8271e-26	5.51776e-134
K562::Max::None::broadPeak	wgEncodeHaibTfbsK562MaxV0416102PkRep1	NA	broadPeak	wgEncodeHaibTfbs	K562	Max	Max	MAX	Max (sc-197)	None	K562::Max::None::broadPeak	3.08628e-26	8.25256e-148
GM12878::MAZ::None::narrowPeak	wgEncodeSydhTfbsGm12878Mazab85725IggmusPk	peak	narrowPeak	wgEncodeSydhTfbs	GM12878	MAZ_(ab85725)	MAZ	MAZ	MAZ (ab85725)	None	GM12878::MAZ::None::narrowPeak	3.53774e-26	1.28315e-138
HeLa-S3::AP-2alpha::None::narrowPeak	wgEncodeSydhTfbsHelas3Ap2alphaStdPk	peak	narrowPeak	wgEncodeSydhTfbs	HeLa-S3	AP-2alpha	AP-2alpha	TFAP2A	AP-2alpha (sc-8975)	None	HeLa-S3::AP-2alpha::None::narrowPeak	3.96574e-26	4.07619e-27
K562::COREST::None::narrowPeak	wgEncodeSydhTfbsK562Corestab24166IggrabPk	peak	narrowPeak	wgEncodeSydhTfbs	K562	COREST_(ab24166)	COREST	RCOR1	COREST (ab24166)	None	K562::COREST::None::narrowPeak	4.39181e-26	1.59498e-121
K562::ZBTB7A::None::broadPeak	wgEncodeHaibTfbsK562Zbtb7asc34508V0416101PkRep1	NA	broadPeak	wgEncodeHaibTfbs	K562	ZBTB7A_(SC-34508)	ZBTB7A	ZBTB7A	ZBTB7A (sc-34508)	None	K562::ZBTB7A::None::broadPeak	5.66541e-26	1.44139e-85
HepG2::c-Myc::NA::narrowPeak	wgEncodeOpenChromChipHepg2CmycPk	peak	narrowPeak	wgEncodeOpenChromChip	HepG2	c-Myc	c-Myc	MYC	c-Myc (sc-764)	NA	HepG2::c-Myc::NA::narrowPeak	8.84879e-26	3.71472e-121
K562::EGR1::None::broadPeak	wgEncodeHaibTfbsK562Egr1V0416101PkRep1	NA	broadPeak	wgEncodeHaibTfbs	K562	Egr-1	EGR1	EGR1	EGR1 (sc-110)	None	K562::EGR1::None::broadPeak	1.00224e-25	2.86163e-101
HeLa-S3::MafK::None::narrowPeak	wgEncodeSydhTfbsHelas3MafkIggrabPk	peak	narrowPeak	wgEncodeSydhTfbs	HeLa-S3	MafK_(ab50322)	MafK	MAFK	MafK (ab50322)	None	HeLa-S3::MafK::None::narrowPeak	1.30679e-25	1.04208e-154
H1-hESC::TBP::None::narrowPeak	wgEncodeSydhTfbsH1hescTbpIggrabPk	peak	narrowPeak	wgEncodeSydhTfbs	H1-hESC	TBP	TBP	TBP	TBP (ab62126)	None	H1-hESC::TBP::None::narrowPeak	2.00368e-25	1.75108e-118
K562::BHLHE40::None::narrowPeak	wgEncodeSydhTfbsK562Bhlhe40nb100IggrabPk	peak	narrowPeak	wgEncodeSydhTfbs	K562	BHLHE40_(NB100-1800)	BHLHE40	BHLHE40	BHLHE40 (NB100-1800)	None	K562::BHLHE40::None::narrowPeak	5.83285e-25	8.94891e-122
H1-hESC::JunD::None::narrowPeak	wgEncodeSydhTfbsH1hescJundIggrabPk	peak	narrowPeak	wgEncodeSydhTfbs	H1-hESC	JunD	JunD	JUND	JunD (sc-74)	None	H1-hESC::JunD::None::narrowPeak	7.12164e-25	3.59835e-94
H1-hESC::CHD2::None::narrowPeak	wgEncodeSydhTfbsH1hescChd2IggrabPk	peak	narrowPeak	wgEncodeSydhTfbs	H1-hESC	CHD2_(AB68301)	CHD2	CHD2	CHD2 (ab68301)	None	H1-hESC::CHD2::None::narrowPeak	9.89482e-25	6.50697e-104
H1-hESC::Mxi1::None::narrowPeak	wgEncodeSydhTfbsH1hescMxi1IggrabPk	peak	narrowPeak	wgEncodeSydhTfbs	H1-hESC	Mxi1_(AF4185)	Mxi1	MXI1	Mxi1 (AF4185)	None	H1-hESC::Mxi1::None::narrowPeak	2.70517e-24	2.1486e-97
HeLa-S3::GTF2F1::None::narrowPeak	wgEncodeSydhTfbsHelas3Gtf2f1ab28179IggrabPk	peak	narrowPeak	wgEncodeSydhTfbs	HeLa-S3	GTF2F1_(AB28179)	GTF2F1	GTF2F1	GTF2F1 (ab28179)	None	HeLa-S3::GTF2F1::None::narrowPeak	2.79034e-24	8.40273e-168
HeLa-S3::BRCA1::None::narrowPeak	wgEncodeSydhTfbsHelas3Brca1a300IggrabPk	peak	narrowPeak	wgEncodeSydhTfbs	HeLa-S3	BRCA1_(A300-000A)	BRCA1	BRCA1	BRCA1 (A300-000A)	None	HeLa-S3::BRCA1::None::narrowPeak	4.51752e-24	1.24906e-161
HepG2::RAD21::None::narrowPeak	wgEncodeSydhTfbsHepg2Rad21IggrabPk	peak	narrowPeak	wgEncodeSydhTfbs	HepG2	Rad21	RAD21	RAD21	RAD21 (ab992)	None	HepG2::RAD21::None::narrowPeak	5.3597e-24	1.49415e-40
HepG2::RFX5::None::narrowPeak	wgEncodeSydhTfbsHepg2Rfx5200401194IggrabPk	peak	narrowPeak	wgEncodeSydhTfbs	HepG2	RFX5_(200-401-194)	RFX5	RFX5	RFX5 (200-401-194)	None	HepG2::RFX5::None::narrowPeak	2.10312e-23	4.37661e-133
K562::CHD2::None::narrowPeak	wgEncodeSydhTfbsK562Chd2ab68301IggrabPk	peak	narrowPeak	wgEncodeSydhTfbs	K562	CHD2_(AB68301)	CHD2	CHD2	CHD2 (ab68301)	None	K562::CHD2::None::narrowPeak	2.59903e-23	2.24752e-140
H1-hESC::Znf143::None::narrowPeak	wgEncodeSydhTfbsH1hescZnf143IggrabPk	peak	narrowPeak	wgEncodeSydhTfbs	H1-hESC	Znf143_(16618-1-AP)	Znf143	ZNF143	Znf143 (16618-1-AP)	None	H1-hESC::Znf143::None::narrowPeak	2.79555e-23	1.49472e-63
HeLa-S3::ELK1::None::narrowPeak	wgEncodeSydhTfbsHelas3Elk112771IggrabPk	peak	narrowPeak	wgEncodeSydhTfbs	HeLa-S3	ELK1_(1277-1)	ELK1	ELK1	ELK1 (1277-1)	None	HeLa-S3::ELK1::None::narrowPeak	3.78813e-23	9.51765e-165
GM12878::Max::None::narrowPeak	wgEncodeSydhTfbsGm12878MaxIggmusPk	peak	narrowPeak	wgEncodeSydhTfbs	GM12878	Max	Max	MAX	Max (sc-197)	None	GM12878::Max::None::narrowPeak	1.30271e-22	8.49259e-144
K562::JunD::None::narrowPeak	wgEncodeSydhTfbsK562JundIggrabPk	peak	narrowPeak	wgEncodeSydhTfbs	K562	JunD	JunD	JUND	JunD (sc-74)	None	K562::JunD::None::narrowPeak	4.84375e-22	1.56116e-124
HepG2::ZBTB7A::None::broadPeak	wgEncodeHaibTfbsHepg2Zbtb7aV0416101PkRep1	NA	broadPeak	wgEncodeHaibTfbs	HepG2	ZBTB7A_(SC-34508)	ZBTB7A	ZBTB7A	ZBTB7A (sc-34508)	None	HepG2::ZBTB7A::None::broadPeak	5.21538e-22	7.64719e-46
HeLa-S3::TBP::None::narrowPeak	wgEncodeSydhTfbsHelas3TbpIggrabPk	peak	narrowPeak	wgEncodeSydhTfbs	HeLa-S3	TBP	TBP	TBP	TBP (ab62126)	None	HeLa-S3::TBP::None::narrowPeak	5.51817e-22	4.17032e-157
GM12878::Znf143::None::narrowPeak	wgEncodeSydhTfbsGm12878Znf143166181apStdPk	peak	narrowPeak	wgEncodeSydhTfbs	GM12878	Znf143_(16618-1-AP)	Znf143	ZNF143	Znf143 (16618-1-AP)	None	GM12878::Znf143::None::narrowPeak	5.7749e-22	4.75418e-121
GM12878::BHLHE40::None::narrowPeak	wgEncodeSydhTfbsGm12878Bhlhe40cIggmusPk	peak	narrowPeak	wgEncodeSydhTfbs	GM12878	BHLHE40_(NB100-1800)	BHLHE40	BHLHE40	BHLHE40 (NB100-1800)	None	GM12878::BHLHE40::None::narrowPeak	5.92225e-22	2.15485e-127
HeLa-S3::TCF7L2::None::narrowPeak	wgEncodeSydhTfbsHelas3Tcf7l2UcdPk	peak	narrowPeak	wgEncodeSydhTfbs	HeLa-S3	TCF7L2	TCF7L2	TCF7L2	TCF7L2 (2569)	None	HeLa-S3::TCF7L2::None::narrowPeak	6.37746e-22	1.46732e-116
H1-hESC::CtBP2::None::narrowPeak	wgEncodeSydhTfbsH1hescCtbp2UcdPk	peak	narrowPeak	wgEncodeSydhTfbs	H1-hESC	CtBP2	CtBP2	CTBP2	CtBP2 (612044)	None	H1-hESC::CtBP2::None::narrowPeak	8.69466e-22	9.38155e-14
HepG2::BHLHE40::None::narrowPeak	wgEncodeSydhTfbsHepg2Bhlhe40cIggrabPk	peak	narrowPeak	wgEncodeSydhTfbs	HepG2	BHLHE40_(NB100-1800)	BHLHE40	BHLHE40	BHLHE40 (NB100-1800)	None	HepG2::BHLHE40::None::narrowPeak	8.81845e-22	1.50204e-81
K562::c-Myc::IFNg30::narrowPeak	wgEncodeSydhTfbsK562CmycIfng30StdPk	peak	narrowPeak	wgEncodeSydhTfbs	K562	c-Myc	c-Myc	MYC	c-Myc (sc-764)	IFNg30	K562::c-Myc::IFNg30::narrowPeak	1.27339e-21	8.07312e-144
HCT-116::TCF7L2::None::narrowPeak	wgEncodeSydhTfbsHct116Tcf7l2UcdPk	peak	narrowPeak	wgEncodeSydhTfbs	HCT-116	TCF7L2	TCF7L2	TCF7L2	TCF7L2 (2569)	None	HCT-116::TCF7L2::None::narrowPeak	1.51e-21	4.68105e-97
HeLa-S3::P300::None::narrowPeak	wgEncodeSydhTfbsHelas3P300sc584sc584IggrabPk	peak	narrowPeak	wgEncodeSydhTfbs	HeLa-S3	p300_(SC-584)	P300	EP300	P300 (sc-584)	None	HeLa-S3::P300::None::narrowPeak	1.53528e-21	3.45692e-26
MCF10A-Er-Src::STAT3::EtOH_0.01pct_12hr::narrowPeak	wgEncodeSydhTfbsMcf10aesStat3Etoh01cStdPk	peak	narrowPeak	wgEncodeSydhTfbs	MCF10A-Er-Src	STAT3	STAT3	STAT3	STAT3 (sc-482)	EtOH_0.01pct_12hr	MCF10A-Er-Src::STAT3::EtOH_0.01pct_12hr::narrowPeak	2.07936e-21	2.10056e-61
PANC-1::TCF7L2::None::narrowPeak	wgEncodeSydhTfbsPanc1Tcf7l2UcdPk	peak	narrowPeak	wgEncodeSydhTfbs	PANC-1	TCF7L2	TCF7L2	TCF7L2	TCF7L2 (2569)	None	PANC-1::TCF7L2::None::narrowPeak	2.82919e-21	3.05065e-114
K562::TBLR1::None::narrowPeak	wgEncodeSydhTfbsK562Tblr1ab24550IggrabPk	peak	narrowPeak	wgEncodeSydhTfbs	K562	TBLR1_(ab24550)	TBLR1	TBL1XR1	TBLR1 (ab24550)	None	K562::TBLR1::None::narrowPeak	3.49664e-21	3.29618e-141
GM12878::CHD2::None::narrowPeak	wgEncodeSydhTfbsGm12878Chd2ab68301IggmusPk	peak	narrowPeak	wgEncodeSydhTfbs	GM12878	CHD2_(AB68301)	CHD2	CHD2	CHD2 (ab68301)	None	GM12878::CHD2::None::narrowPeak	3.81479e-21	4.96379e-146
MCF10A-Er-Src::STAT3::4OHTAM_1uM_12hr::narrowPeak	wgEncodeSydhTfbsMcf10aesStat3Tam112hHvdPk	peak	narrowPeak	wgEncodeSydhTfbs	MCF10A-Er-Src	STAT3	STAT3	STAT3	STAT3 (sc-482)	4OHTAM_1uM_12hr	MCF10A-Er-Src::STAT3::4OHTAM_1uM_12hr::narrowPeak	3.85024e-21	1.64811e-73
NB4::Max::None::narrowPeak	wgEncodeSydhTfbsNb4MaxStdPk	peak	narrowPeak	wgEncodeSydhTfbs	NB4	Max	Max	MAX	Max (sc-197)	None	NB4::Max::None::narrowPeak	4.25539e-21	1.05006e-140
H1-hESC::c-Myc::None::narrowPeak	wgEncodeSydhTfbsH1hescCmycIggrabPk	peak	narrowPeak	wgEncodeSydhTfbs	H1-hESC	c-Myc	c-Myc	MYC	c-Myc (sc-764)	None	H1-hESC::c-Myc::None::narrowPeak	5.58629e-21	6.2598e-102
HeLa-S3::E2F1::None::narrowPeak	wgEncodeSydhTfbsHelas3E2f1StdPk	peak	narrowPeak	wgEncodeSydhTfbs	HeLa-S3	E2F1	E2F1	E2F1	E2F1 (05-379)	None	HeLa-S3::E2F1::None::narrowPeak	5.64923e-21	1.68289e-115
HepG2::TBP::None::narrowPeak	wgEncodeSydhTfbsHepg2TbpIggrabPk	peak	narrowPeak	wgEncodeSydhTfbs	HepG2	TBP	TBP	TBP	TBP (ab62126)	None	HepG2::TBP::None::narrowPeak	9.26186e-21	8.70519e-154
A549::SP1::EtOH_0.02pct::broadPeak	wgEncodeHaibTfbsA549Sp1V0422111Etoh02PkRep1	NA	broadPeak	wgEncodeHaibTfbs	A549	SP1	SP1	SP1	SP1 (sc-17824)	EtOH_0.02pct	A549::SP1::EtOH_0.02pct::broadPeak	1.27492e-20	5.3682e-170
PANC-1::SIN3AK20::None::broadPeak	wgEncodeHaibTfbsPanc1Sin3ak20V0416101PkRep1	NA	broadPeak	wgEncodeHaibTfbs	PANC-1	Sin3Ak-20	SIN3AK20	SIN3A	SIN3AK20 (sc-994)	None	PANC-1::SIN3AK20::None::broadPeak	2.89542e-20	2.38492e-189
K562::PLU1::NA::broadPeak	wgEncodeBroadHistoneK562Plu1StdPk	NA	broadPeak	wgEncodeBroadHistone	K562	PLU1	PLU1	KDM5B	PLU1	NA	K562::PLU1::NA::broadPeak	3.16124e-20	3.73665e-67
HUVEC::c-Myc::NA::narrowPeak	wgEncodeOpenChromChipHuvecCmycPk	peak	narrowPeak	wgEncodeOpenChromChip	HUVEC	c-Myc	c-Myc	MYC	c-Myc (sc-764)	NA	HUVEC::c-Myc::NA::narrowPeak	6.17051e-20	3.14955e-125
H1-hESC::GTF2F1::None::narrowPeak	wgEncodeSydhTfbsH1hescGtf2f1IggrabPk	peak	narrowPeak	wgEncodeSydhTfbs	H1-hESC	GTF2F1_(AB28179)	GTF2F1	GTF2F1	GTF2F1 (ab28179)	None	H1-hESC::GTF2F1::None::narrowPeak	8.63651e-20	3.29889e-106
K562::PHF8::NA::broadPeak	wgEncodeBroadHistoneK562Phf8a301772aStdPk	NA	broadPeak	wgEncodeBroadHistone	K562	PHF8_(A301-772A)	PHF8	PHF8	PHF8 (A301-772A)	NA	K562::PHF8::NA::broadPeak	8.80246e-20	1.6241e-128
IMR90::RAD21::None::narrowPeak	wgEncodeSydhTfbsImr90Rad21IggrabPk	peak	narrowPeak	wgEncodeSydhTfbs	IMR90	Rad21	RAD21	RAD21	RAD21 (ab992)	None	IMR90::RAD21::None::narrowPeak	1.70756e-19	6.17703e-44
HepG2::RAD21::None::broadPeak	wgEncodeHaibTfbsHepg2Rad21V0416101PkRep1	NA	broadPeak	wgEncodeHaibTfbs	HepG2	Rad21	RAD21	RAD21	RAD21 (ab992)	None	HepG2::RAD21::None::broadPeak	1.73235e-19	7.03099e-19
HeLa-S3::USF2::None::narrowPeak	wgEncodeSydhTfbsHelas3Usf2IggmusPk	peak	narrowPeak	wgEncodeSydhTfbs	HeLa-S3	USF2	USF2	USF2	USF2 (ab60931)	None	HeLa-S3::USF2::None::narrowPeak	2.47389e-19	3.27537e-123
HepG2::CEBPD::None::broadPeak	wgEncodeHaibTfbsHepg2Cebpdsc636V0416101PkRep1	NA	broadPeak	wgEncodeHaibTfbs	HepG2	CEBPD_(SC-636)	CEBPD	CEBPD	CEBPD (sc-636)	None	HepG2::CEBPD::None::broadPeak	4.0872e-19	2.51645e-95
GM12878::Mxi1::None::narrowPeak	wgEncodeSydhTfbsGm12878Mxi1IggmusPk	peak	narrowPeak	wgEncodeSydhTfbs	GM12878	Mxi1_(AF4185)	Mxi1	MXI1	Mxi1 (AF4185)	None	GM12878::Mxi1::None::narrowPeak	5.60368e-19	1.60991e-137
GM12878::STAT1::None::narrowPeak	wgEncodeSydhTfbsGm12878Stat1StdPk	peak	narrowPeak	wgEncodeSydhTfbs	GM12878	STAT1	STAT1	STAT1	STAT1 (sc-345)	None	GM12878::STAT1::None::narrowPeak	6.04682e-19	4.75758e-140
GM12878::COREST::None::narrowPeak	wgEncodeSydhTfbsGm12878Corestsc30189IggmusPk	peak	narrowPeak	wgEncodeSydhTfbs	GM12878	COREST_(sc-30189)	COREST	RCOR1	COREST (sc30189)	None	GM12878::COREST::None::narrowPeak	7.70238e-19	2.72924e-115
K562::Max::None::narrowPeak	wgEncodeSydhTfbsK562MaxIggrabPk	peak	narrowPeak	wgEncodeSydhTfbs	K562	Max	Max	MAX	Max (sc-197)	None	K562::Max::None::narrowPeak	1.07598e-18	1.02571e-105
K562::TBP::None::narrowPeak	wgEncodeSydhTfbsK562TbpIggmusPk	peak	narrowPeak	wgEncodeSydhTfbs	K562	TBP	TBP	TBP	TBP (ab62126)	None	K562::TBP::None::narrowPeak	2.09899e-18	4.37201e-146
H1-hESC::CHD1::NA::broadPeak	wgEncodeBroadHistoneH1hescChd1a301218aStdPk	NA	broadPeak	wgEncodeBroadHistone	H1-hESC	CHD1_(A301-218A)	CHD1	CHD1	CHD1 (A301-218A)	NA	H1-hESC::CHD1::NA::broadPeak	2.75469e-18	1.50289e-58
K562::HDAC1::NA::broadPeak	wgEncodeBroadHistoneK562Hdac1sc6298StdPk	NA	broadPeak	wgEncodeBroadHistone	K562	HDAC1_(SC-6298)	HDAC1	HDAC1	HDAC1 (sc-6298)	NA	K562::HDAC1::NA::broadPeak	4.45039e-18	7.59032e-66
NB4::c-Myc::None::narrowPeak	wgEncodeSydhTfbsNb4CmycStdPk	peak	narrowPeak	wgEncodeSydhTfbs	NB4	c-Myc	c-Myc	MYC	c-Myc (sc-764)	None	NB4::c-Myc::None::narrowPeak	5.3364e-18	1.23031e-140
H1-hESC::USF2::None::narrowPeak	wgEncodeSydhTfbsH1hescUsf2IggrabPk	peak	narrowPeak	wgEncodeSydhTfbs	H1-hESC	USF2	USF2	USF2	USF2 (ab60931)	None	H1-hESC::USF2::None::narrowPeak	6.18366e-18	4.49592e-77
HeLa-S3::STAT3::None::narrowPeak	wgEncodeSydhTfbsHelas3Stat3IggrabPk	peak	narrowPeak	wgEncodeSydhTfbs	HeLa-S3	STAT3	STAT3	STAT3	STAT3 (sc-482)	None	HeLa-S3::STAT3::None::narrowPeak	8.04737e-18	1.01084e-22
K562::c-Myc::NA::narrowPeak	wgEncodeOpenChromChipK562CmycPk	peak	narrowPeak	wgEncodeOpenChromChip	K562	c-Myc	c-Myc	MYC	c-Myc (sc-764)	NA	K562::c-Myc::NA::narrowPeak	9.51366e-18	1.51247e-121
HepG2::ARID3A::None::narrowPeak	wgEncodeSydhTfbsHepg2Arid3anb100279IggrabPk	peak	narrowPeak	wgEncodeSydhTfbs	HepG2	ARID3A_(NB100-279)	ARID3A	ARID3A	ARID3A (NB100-279)	None	HepG2::ARID3A::None::narrowPeak	1.00522e-17	2.88851e-106
K562::c-Myc::None::narrowPeak	wgEncodeSydhTfbsK562CmycIggrabPk	peak	narrowPeak	wgEncodeSydhTfbs	K562	c-Myc	c-Myc	MYC	c-Myc (sc-764)	None	K562::c-Myc::None::narrowPeak	1.16138e-17	5.56109e-108
H1-hESC::TAF1::None::broadPeak	wgEncodeHaibTfbsH1hescTaf1V0416102PkRep1	NA	broadPeak	wgEncodeHaibTfbs	H1-hESC	TAF1	TAF1	TAF1	TAF1 (sc-735)	None	H1-hESC::TAF1::None::broadPeak	1.81039e-17	1.79549e-154
K562::Znf143::None::narrowPeak	wgEncodeSydhTfbsK562Znf143IggrabPk	peak	narrowPeak	wgEncodeSydhTfbs	K562	Znf143_(16618-1-AP)	Znf143	ZNF143	Znf143 (16618-1-AP)	None	K562::Znf143::None::narrowPeak	4.36035e-17	3.21371e-101
H1-hESC::CHD1::None::narrowPeak	wgEncodeSydhTfbsH1hescChd1a301218aIggrabPk	peak	narrowPeak	wgEncodeSydhTfbs	H1-hESC	CHD1_(A301-218A)	CHD1	CHD1	CHD1 (A301-218A)	None	H1-hESC::CHD1::None::narrowPeak	5.99903e-17	1.23866e-85
MCF10A-Er-Src::c-Fos::4OHTAM_1uM_4hr::narrowPeak	wgEncodeSydhTfbsMcf10aesCfosTam14hHvdPk	peak	narrowPeak	wgEncodeSydhTfbs	MCF10A-Er-Src	c-Fos	c-Fos	FOS	c-Fos (sc-7202)	4OHTAM_1uM_4hr	MCF10A-Er-Src::c-Fos::4OHTAM_1uM_4hr::narrowPeak	6.17579e-17	1.02125e-70
GM12878::CHD1::None::narrowPeak	wgEncodeSydhTfbsGm12878Chd1a301218aIggmusPk	peak	narrowPeak	wgEncodeSydhTfbs	GM12878	CHD1_(A301-218A)	CHD1	CHD1	CHD1 (A301-218A)	None	GM12878::CHD1::None::narrowPeak	6.42628e-17	1.94029e-121
MCF-7::TCF7L2::None::narrowPeak	wgEncodeSydhTfbsMcf7Tcf7l2UcdPk	peak	narrowPeak	wgEncodeSydhTfbs	MCF-7	TCF7L2	TCF7L2	TCF7L2	TCF7L2 (2569)	None	MCF-7::TCF7L2::None::narrowPeak	7.18124e-17	1.65857e-29
GM12878::EBF1::None::narrowPeak	wgEncodeSydhTfbsGm12878Ebf1sc137065StdPk	peak	narrowPeak	wgEncodeSydhTfbs	GM12878	EBF1_(SC-137065)	EBF1	EBF1	EBF1 (sc-137065)	None	GM12878::EBF1::None::narrowPeak	8.56309e-17	5.77326e-97
SK-N-SH_RA::RAD21::None::broadPeak	wgEncodeHaibTfbsSknshraRad21V0416102PkRep1	NA	broadPeak	wgEncodeHaibTfbs	SK-N-SH_RA	Rad21	RAD21	RAD21	RAD21 (ab992)	None	SK-N-SH_RA::RAD21::None::broadPeak	8.7432e-17	3.2687e-22
H1-hESC::RBBP5::NA::broadPeak	wgEncodeBroadHistoneH1hescRbbp5a300109aStdPk	NA	broadPeak	wgEncodeBroadHistone	H1-hESC	RBBP5_(A300-109A)	RBBP5	RBBP5	RBBP5 (A300-109A)	NA	H1-hESC::RBBP5::NA::broadPeak	1.07821e-16	1.17433e-57
MCF10A-Er-Src::STAT3::4OHTAM_1uM_36hr::narrowPeak	wgEncodeSydhTfbsMcf10aesStat3TamStdPk	peak	narrowPeak	wgEncodeSydhTfbs	MCF10A-Er-Src	STAT3	STAT3	STAT3	STAT3 (sc-482)	4OHTAM_1uM_36hr	MCF10A-Er-Src::STAT3::4OHTAM_1uM_36hr::narrowPeak	1.49964e-16	4.15298e-89
K562::IRF1::IFNg6h::narrowPeak	wgEncodeSydhTfbsK562Irf1Ifng6hStdPk	peak	narrowPeak	wgEncodeSydhTfbs	K562	IRF1	IRF1	IRF1	IRF1 (sc-497)	IFNg6h	K562::IRF1::IFNg6h::narrowPeak	1.51711e-16	6.82182e-143
K562::JunD::NA::narrowPeak	wgEncodeUchicagoTfbsK562EjundControlPk	peak	narrowPeak	NA	K562	eGFP-JunD	JunD	JUND	JunD (eGFP-JunD)	NA	K562::JunD::NA::narrowPeak	2.20422e-16	3.53363e-85
HepG2::FOXA1::None::broadPeak	wgEncodeHaibTfbsHepg2Foxa1sc101058V0416101PkRep1	NA	broadPeak	wgEncodeHaibTfbs	HepG2	FOXA1_(SC-101058)	FOXA1	FOXA1	FOXA1 (sc-101058)	None	HepG2::FOXA1::None::broadPeak	3.73876e-16	2.19547e-39
HepG2::SMC3::None::narrowPeak	wgEncodeSydhTfbsHepg2Smc3ab9263IggrabPk	peak	narrowPeak	wgEncodeSydhTfbs	HepG2	SMC3_(ab9263)	SMC3	SMC3	SMC3 (ab9263)	None	HepG2::SMC3::None::narrowPeak	4.06574e-16	1.63557e-37
MCF10A-Er-Src::c-Fos::4OHTAM_1uM_12hr::narrowPeak	wgEncodeSydhTfbsMcf10aesCfosTam112hHvdPk	peak	narrowPeak	wgEncodeSydhTfbs	MCF10A-Er-Src	c-Fos	c-Fos	FOS	c-Fos (sc-7202)	4OHTAM_1uM_12hr	MCF10A-Er-Src::c-Fos::4OHTAM_1uM_12hr::narrowPeak	6.89646e-16	4.91772e-79
K562::HDAC2::NA::broadPeak	wgEncodeBroadHistoneK562Hdac2a300705aStdPk	NA	broadPeak	wgEncodeBroadHistone	K562	HDAC2_(A300-705A)	HDAC2	HDAC2	HDAC2 (A300-705A)	NA	K562::HDAC2::NA::broadPeak	7.45817e-16	2.26952e-41
PFSK-1::FOXP2::None::broadPeak	wgEncodeHaibTfbsPfsk1Foxp2Pcr2xPkRep1	NA	broadPeak	wgEncodeHaibTfbs	PFSK-1	FOXP2	FOXP2	FOXP2	FOXP2 (ab16046)	None	PFSK-1::FOXP2::None::broadPeak	9.15062e-16	5.00442e-79
H1-hESC::RAD21::None::narrowPeak	wgEncodeSydhTfbsH1hescRad21IggrabPk	peak	narrowPeak	wgEncodeSydhTfbs	H1-hESC	Rad21	RAD21	RAD21	RAD21 (ab992)	None	H1-hESC::RAD21::None::narrowPeak	1.23324e-15	8.41248e-21
HepG2::P300::None::broadPeak	wgEncodeHaibTfbsHepg2P300V0416101PkRep1	NA	broadPeak	wgEncodeHaibTfbs	HepG2	p300	P300	EP300	P300 (sc-585)	None	HepG2::P300::None::broadPeak	1.74911e-15	5.50568e-28
HepG2::TAF1::None::broadPeak	wgEncodeHaibTfbsHepg2Taf1Pcr2xPkRep1	NA	broadPeak	wgEncodeHaibTfbs	HepG2	TAF1	TAF1	TAF1	TAF1 (sc-735)	None	HepG2::TAF1::None::broadPeak	2.10135e-15	6.7577e-130
MCF-7::c-Myc::estrogen::narrowPeak	wgEncodeOpenChromChipMcf7CmycEstroPkRep1	peak	narrowPeak	wgEncodeOpenChromChip	MCF-7	c-Myc	c-Myc	MYC	c-Myc (sc-764)	estrogen	MCF-7::c-Myc::estrogen::narrowPeak	6.82236e-15	1.53364e-68
GM12878::SMC3::None::narrowPeak	wgEncodeSydhTfbsGm12878Smc3ab9263IggmusPk	peak	narrowPeak	wgEncodeSydhTfbs	GM12878	SMC3_(ab9263)	SMC3	SMC3	SMC3 (ab9263)	None	GM12878::SMC3::None::narrowPeak	8.73421e-15	1.7235e-61
K562::Mxi1::None::narrowPeak	wgEncodeSydhTfbsK562Mxi1af4185IggrabPk	peak	narrowPeak	wgEncodeSydhTfbs	K562	Mxi1_(AF4185)	Mxi1	MXI1	Mxi1 (AF4185)	None	K562::Mxi1::None::narrowPeak	1.30732e-14	6.02386e-133
GM12878::WHIP::None::narrowPeak	wgEncodeSydhTfbsGm12878WhipIggmusPk	peak	narrowPeak	wgEncodeSydhTfbs	GM12878	WHIP	WHIP	WRNIP1	WHIP (ab4731)	None	GM12878::WHIP::None::narrowPeak	1.57659e-14	2.90053e-97
ECC-1::GR::DEX_100nM::broadPeak	wgEncodeHaibTfbsEcc1GrV0416102Dex100nmPkRep1	NA	broadPeak	wgEncodeHaibTfbs	ECC-1	GR	GR	NR3C1	GR (sc-1003)	DEX_100nM	ECC-1::GR::DEX_100nM::broadPeak	1.75977e-14	3.11251e-12
GM12878::TBLR1::None::narrowPeak	wgEncodeSydhTfbsGm12878Tblr1ab24550IggmusPk	peak	narrowPeak	wgEncodeSydhTfbs	GM12878	TBLR1_(ab24550)	TBLR1	TBL1XR1	TBLR1 (ab24550)	None	GM12878::TBLR1::None::narrowPeak	2.51773e-14	2.8569e-124
A549::TCF12::EtOH_0.02pct::broadPeak	wgEncodeHaibTfbsA549Tcf12V0422111Etoh02PkRep1	NA	broadPeak	wgEncodeHaibTfbs	A549	TCF12	TCF12	TCF12	TCF12 (sc-357)	EtOH_0.02pct	A549::TCF12::EtOH_0.02pct::broadPeak	2.5482e-14	1.01838e-122
K562::SMC3::None::narrowPeak	wgEncodeSydhTfbsK562Smc3ab9263IggrabPk	peak	narrowPeak	wgEncodeSydhTfbs	K562	SMC3_(ab9263)	SMC3	SMC3	SMC3 (ab9263)	None	K562::SMC3::None::narrowPeak	3.10711e-14	2.28944e-61
SK-N-SH::SIN3AK20::None::broadPeak	wgEncodeHaibTfbsSknshSin3ak20V0416101PkRep1	NA	broadPeak	wgEncodeHaibTfbs	SK-N-SH	Sin3Ak-20	SIN3AK20	SIN3A	SIN3AK20 (sc-994)	None	SK-N-SH::SIN3AK20::None::broadPeak	3.55825e-14	6.5343e-170
HeLa-S3::c-Myc::NA::narrowPeak	wgEncodeOpenChromChipHelas3CmycPk	peak	narrowPeak	wgEncodeOpenChromChip	HeLa-S3	c-Myc	c-Myc	MYC	c-Myc (sc-764)	NA	HeLa-S3::c-Myc::NA::narrowPeak	3.80074e-14	1.36222e-46
GM12878::SIN3A::None::narrowPeak	wgEncodeSydhTfbsGm12878Sin3anb6001263IggmusPk	peak	narrowPeak	wgEncodeSydhTfbs	GM12878	SIN3A_(NB600-1263)	SIN3A	SIN3A	SIN3A (NB600-1263)	None	GM12878::SIN3A::None::narrowPeak	4.42681e-14	7.6419e-153
GM12878::NRF1::None::narrowPeak	wgEncodeSydhTfbsGm12878Nrf1IggmusPk	peak	narrowPeak	wgEncodeSydhTfbs	GM12878	Nrf1	NRF1	NRF1	NRF1 (ab55744)	None	GM12878::NRF1::None::narrowPeak	5.15939e-14	2.63061e-123
HepG2::SIN3AK20::None::broadPeak	wgEncodeHaibTfbsHepg2Sin3ak20Pcr1xPkRep1	NA	broadPeak	wgEncodeHaibTfbs	HepG2	Sin3Ak-20	SIN3AK20	SIN3A	SIN3AK20 (sc-994)	None	HepG2::SIN3AK20::None::broadPeak	6.23478e-14	5.48907e-160
A549::RAD21::None::narrowPeak	wgEncodeSydhTfbsA549Rad21IggrabPk	peak	narrowPeak	wgEncodeSydhTfbs	A549	Rad21	RAD21	RAD21	RAD21 (ab992)	None	A549::RAD21::None::narrowPeak	7.20117e-14	3.70435e-20
K562::RBBP5::NA::broadPeak	wgEncodeBroadHistoneK562Rbbp5a300109aStdPk	NA	broadPeak	wgEncodeBroadHistone	K562	RBBP5_(A300-109A)	RBBP5	RBBP5	RBBP5 (A300-109A)	NA	K562::RBBP5::NA::broadPeak	8.03533e-14	1.8181e-80
H1-hESC::Max::None::narrowPeak	wgEncodeSydhTfbsH1hescMaxUcdPk	peak	narrowPeak	wgEncodeSydhTfbs	H1-hESC	Max	Max	MAX	Max (sc-197)	None	H1-hESC::Max::None::narrowPeak	1.15512e-13	1.18793e-75
H1-hESC::CEBPB::None::narrowPeak	wgEncodeSydhTfbsH1hescCebpbIggrabPk	peak	narrowPeak	wgEncodeSydhTfbs	H1-hESC	CEBPB	CEBPB	CEBPB	CEBPB (sc-150)	None	H1-hESC::CEBPB::None::narrowPeak	2.58142e-13	6.11368e-45
HeLa-S3::BAF155::None::narrowPeak	wgEncodeSydhTfbsHelas3Baf155IggmusPk	peak	narrowPeak	wgEncodeSydhTfbs	HeLa-S3	BAF155	BAF155	SMARCC1	BAF155 (sc-10756)	None	HeLa-S3::BAF155::None::narrowPeak	3.09265e-13	2.99979e-19
K562::E2F4::None::narrowPeak	wgEncodeSydhTfbsK562E2f4UcdPk	peak	narrowPeak	wgEncodeSydhTfbs	K562	E2F4	E2F4	E2F4	E2F4 (sc-866)	None	K562::E2F4::None::narrowPeak	3.37159e-13	2.8449e-156
GM12878::USF2::None::narrowPeak	wgEncodeSydhTfbsGm12878Usf2IggmusPk	peak	narrowPeak	wgEncodeSydhTfbs	GM12878	USF2	USF2	USF2	USF2 (ab60931)	None	GM12878::USF2::None::narrowPeak	3.4415e-13	1.29354e-94
K562::ELF1::None::broadPeak	wgEncodeHaibTfbsK562Elf1sc631V0416102PkRep1	NA	broadPeak	wgEncodeHaibTfbs	K562	ELF1_(SC-631)	ELF1	ELF1	ELF1 (sc-631)	None	K562::ELF1::None::broadPeak	3.4907e-13	8.55479e-127
HepG2::FOXA2::None::broadPeak	wgEncodeHaibTfbsHepg2Foxa2sc6554V0416101PkRep1	NA	broadPeak	wgEncodeHaibTfbs	HepG2	FOXA2_(SC-6554)	FOXA2	FOXA2	FOXA2 (sc-6554)	None	HepG2::FOXA2::None::broadPeak	3.51547e-13	7.88608e-26
HepG2::BRCA1::None::narrowPeak	wgEncodeSydhTfbsHepg2Brca1a300IggrabPk	peak	narrowPeak	wgEncodeSydhTfbs	HepG2	BRCA1_(A300-000A)	BRCA1	BRCA1	BRCA1 (A300-000A)	None	HepG2::BRCA1::None::narrowPeak	4.16837e-13	8.78027e-99
K562::JunB::NA::narrowPeak	wgEncodeUchicagoTfbsK562EjunbControlPk	peak	narrowPeak	NA	K562	eGFP-JunB	JunB	JUNB	JunB (eGFP-JunB)	NA	K562::JunB::NA::narrowPeak	4.41403e-13	5.73109e-86
MCF10A-Er-Src::STAT3::EtOH_0.01pct::narrowPeak	wgEncodeSydhTfbsMcf10aesStat3Etoh01StdPk	peak	narrowPeak	wgEncodeSydhTfbs	MCF10A-Er-Src	STAT3	STAT3	STAT3	STAT3 (sc-482)	EtOH_0.01pct	MCF10A-Er-Src::STAT3::EtOH_0.01pct::narrowPeak	4.79612e-13	3.01641e-79
HeLa-S3::NF-YA::None::narrowPeak	wgEncodeSydhTfbsHelas3NfyaIggrabPk	peak	narrowPeak	wgEncodeSydhTfbs	HeLa-S3	NF-YA	NF-YA	NFYA	NF-YA	None	HeLa-S3::NF-YA::None::narrowPeak	4.83145e-13	2.79908e-110
H1-hESC::JunD::None::broadPeak	wgEncodeHaibTfbsH1hescJundV0416102PkRep1	NA	broadPeak	wgEncodeHaibTfbs	H1-hESC	JunD	JunD	JUND	JunD (sc-74)	None	H1-hESC::JunD::None::broadPeak	6.18031e-13	2.42848e-61
K562::RAD21::None::broadPeak	wgEncodeHaibTfbsK562Rad21V0416102PkRep1	NA	broadPeak	wgEncodeHaibTfbs	K562	Rad21	RAD21	RAD21	RAD21 (ab992)	None	K562::RAD21::None::broadPeak	6.2244e-13	1.64592e-21
GM12878::RUNX3::None::broadPeak	wgEncodeHaibTfbsGm12878Runx3sc101553V0422111PkRep1	NA	broadPeak	wgEncodeHaibTfbs	GM12878	RUNX3_(SC-101553)	RUNX3	RUNX3	RUNX3 (sc-101553)	None	GM12878::RUNX3::None::broadPeak	8.39262e-13	3.45066e-122
SK-N-SH_RA::USF1::None::broadPeak	wgEncodeHaibTfbsSknshraUsf1sc8983V0416102PkRep1	NA	broadPeak	wgEncodeHaibTfbs	SK-N-SH_RA	USF1_(SC-8983)	USF1	USF1	USF1 (sc-8983)	None	SK-N-SH_RA::USF1::None::broadPeak	1.09853e-12	1.14387e-70
MCF10A-Er-Src::c-Fos::4OHTAM_1uM_36hr::narrowPeak	wgEncodeSydhTfbsMcf10aesCfosTamHvdPk	peak	narrowPeak	wgEncodeSydhTfbs	MCF10A-Er-Src	c-Fos	c-Fos	FOS	c-Fos (sc-7202)	4OHTAM_1uM_36hr	MCF10A-Er-Src::c-Fos::4OHTAM_1uM_36hr::narrowPeak	1.2845e-12	2.24052e-101
K562::HDAC2::None::broadPeak	wgEncodeHaibTfbsK562Hdac2sc6296V0416102PkRep1	NA	broadPeak	wgEncodeHaibTfbs	K562	HDAC2_(SC-6296)	HDAC2	HDAC2	HDAC2 (sc-6296)	None	K562::HDAC2::None::broadPeak	1.48973e-12	7.98809e-52
H1-hESC::RAD21::None::broadPeak	wgEncodeHaibTfbsH1hescRad21V0416102PkRep1	NA	broadPeak	wgEncodeHaibTfbs	H1-hESC	Rad21	RAD21	RAD21	RAD21 (ab992)	None	H1-hESC::RAD21::None::broadPeak	2.64415e-12	2.67774e-08
GM12878::EBF1::None::broadPeak	wgEncodeHaibTfbsGm12878Ebfsc137065Pcr1xPkRep1	NA	broadPeak	wgEncodeHaibTfbs	GM12878	EBF1_(SC-137065)	EBF1	EBF1	EBF1 (sc-137065)	None	GM12878::EBF1::None::broadPeak	3.10277e-12	8.38973e-41
K562::GTF2F1::None::narrowPeak	wgEncodeSydhTfbsK562Gtf2f1ab28179IggrabPk	peak	narrowPeak	wgEncodeSydhTfbs	K562	GTF2F1_(AB28179)	GTF2F1	GTF2F1	GTF2F1 (ab28179)	None	K562::GTF2F1::None::narrowPeak	3.59369e-12	7.54013e-143
HepG2::CEBPB::None::broadPeak	wgEncodeHaibTfbsHepg2Cebpbsc150V0416101PkRep1	NA	broadPeak	wgEncodeHaibTfbs	HepG2	CEBPB_(SC-150)	CEBPB	CEBPB	CEBPB (sc-150)	None	HepG2::CEBPB::None::broadPeak	4.05372e-12	2.71716e-22
K562::SAP30::NA::broadPeak	wgEncodeBroadHistoneK562Sap3039731StdPk	NA	broadPeak	wgEncodeBroadHistone	K562	SAP30_(39731)	SAP30	SAP30	SAP30 (39731)	NA	K562::SAP30::NA::broadPeak	4.78726e-12	6.90635e-69
A549::GR::DEX_50nM::broadPeak	wgEncodeHaibTfbsA549GrPcr1xDex50nmPkRep1	NA	broadPeak	wgEncodeHaibTfbs	A549	GR	GR	NR3C1	GR (sc-1003)	DEX_50nM	A549::GR::DEX_50nM::broadPeak	5.98804e-12	2.79777e-15
H1-hESC::SP1::None::broadPeak	wgEncodeHaibTfbsH1hescSp1Pcr1xPkRep1	NA	broadPeak	wgEncodeHaibTfbs	H1-hESC	SP1	SP1	SP1	SP1 (sc-17824)	None	H1-hESC::SP1::None::broadPeak	8.28804e-12	4.46712e-92
K562::ARID3A::None::narrowPeak	wgEncodeSydhTfbsK562Arid3asc8821IggrabPk	peak	narrowPeak	wgEncodeSydhTfbs	K562	ARID3A_(sc-8821)	ARID3A	ARID3A	ARID3A (sc-8821)	None	K562::ARID3A::None::narrowPeak	9.10606e-12	3.48153e-84
GM12892::PAX5::None::broadPeak	wgEncodeHaibTfbsGm12892Pax5c20V0416101PkRep1	NA	broadPeak	wgEncodeHaibTfbs	GM12892	PAX5-C20	PAX5	PAX5	PAX5 (sc-1974)	None	GM12892::PAX5::None::broadPeak	1.27955e-11	1.12753e-74
GM12878::NF-YB::None::narrowPeak	wgEncodeSydhTfbsGm12878NfybIggmusPk	peak	narrowPeak	wgEncodeSydhTfbs	GM12878	NF-YB	NF-YB	NFYB	NF-YB	None	GM12878::NF-YB::None::narrowPeak	1.55963e-11	7.87275e-87
HepG2::MYBL2::None::broadPeak	wgEncodeHaibTfbsHepg2Mybl2sc81192V0422111PkRep1	NA	broadPeak	wgEncodeHaibTfbs	HepG2	MYBL2_(SC-81192)	MYBL2	MYBL2	MYBL2 (sc-81192)	None	HepG2::MYBL2::None::broadPeak	1.82884e-11	3.11139e-139
K562::MafK::None::narrowPeak	wgEncodeSydhTfbsK562Mafkab50322IggrabPk	peak	narrowPeak	wgEncodeSydhTfbs	K562	MafK_(ab50322)	MafK	MAFK	MafK (ab50322)	None	K562::MafK::None::narrowPeak	2.7195e-11	4.4092e-107
A549::SIN3AK20::EtOH_0.02pct::broadPeak	wgEncodeHaibTfbsA549Sin3ak20V0422111Etoh02PkRep1	NA	broadPeak	wgEncodeHaibTfbs	A549	Sin3Ak-20	SIN3AK20	SIN3A	SIN3AK20 (sc-994)	EtOH_0.02pct	A549::SIN3AK20::EtOH_0.02pct::broadPeak	2.75345e-11	1.04324e-136
HepG2::CEBPB::None::narrowPeak	wgEncodeSydhTfbsHepg2CebpbIggrabPk	peak	narrowPeak	wgEncodeSydhTfbs	HepG2	CEBPB	CEBPB	CEBPB	CEBPB (sc-150)	None	HepG2::CEBPB::None::narrowPeak	3.34801e-11	4.83957e-44
H1-hESC::TCF12::None::broadPeak	wgEncodeHaibTfbsH1hescTcf12Pcr1xPkRep1	NA	broadPeak	wgEncodeHaibTfbs	H1-hESC	TCF12	TCF12	TCF12	TCF12 (sc-357)	None	H1-hESC::TCF12::None::broadPeak	3.58737e-11	1.5516e-28
K562::CEBPB::None::narrowPeak	wgEncodeSydhTfbsK562CebpbIggrabPk	peak	narrowPeak	wgEncodeSydhTfbs	K562	CEBPB	CEBPB	CEBPB	CEBPB (sc-150)	None	K562::CEBPB::None::narrowPeak	5.59374e-11	3.90307e-54
GM12878::ELF1::None::broadPeak	wgEncodeHaibTfbsGm12878Elf1sc631V0416101PkRep1	NA	broadPeak	wgEncodeHaibTfbs	GM12878	ELF1_(SC-631)	ELF1	ELF1	ELF1 (sc-631)	None	GM12878::ELF1::None::broadPeak	6.87707e-11	3.61788e-128
HepG2::USF2::None::narrowPeak	wgEncodeSydhTfbsHepg2Usf2IggrabPk	peak	narrowPeak	wgEncodeSydhTfbs	HepG2	USF2	USF2	USF2	USF2 (ab60931)	None	HepG2::USF2::None::narrowPeak	8.75531e-11	1.0364e-64
MCF10A-Er-Src::c-Fos::EtOH_0.01pct::narrowPeak	wgEncodeSydhTfbsMcf10aesCfosEtoh01HvdPk	peak	narrowPeak	wgEncodeSydhTfbs	MCF10A-Er-Src	c-Fos	c-Fos	FOS	c-Fos (sc-7202)	EtOH_0.01pct	MCF10A-Er-Src::c-Fos::EtOH_0.01pct::narrowPeak	9.22188e-11	1.38603e-88
HeLa-S3::c-Myc::None::narrowPeak	wgEncodeSydhTfbsHelas3CmycStdPk	peak	narrowPeak	wgEncodeSydhTfbs	HeLa-S3	c-Myc	c-Myc	MYC	c-Myc (sc-764)	None	HeLa-S3::c-Myc::None::narrowPeak	1.27121e-10	1.03963e-36
A549::CREB1::DEX_100nM::broadPeak	wgEncodeHaibTfbsA549Creb1sc240V0416102Dex100nmPkRep1	NA	broadPeak	wgEncodeHaibTfbs	A549	CREB1_(SC-240)	CREB1	CREB1	CREB1 (sc-240)	DEX_100nM	A549::CREB1::DEX_100nM::broadPeak	1.44264e-10	7.06698e-131
A549::CEBPB::None::narrowPeak	wgEncodeSydhTfbsA549CebpbIggrabPk	peak	narrowPeak	wgEncodeSydhTfbs	A549	CEBPB	CEBPB	CEBPB	CEBPB (sc-150)	None	A549::CEBPB::None::narrowPeak	1.72917e-10	5.12157e-37
HeLa-S3::NF-YB::None::narrowPeak	wgEncodeSydhTfbsHelas3NfybIggrabPk	peak	narrowPeak	wgEncodeSydhTfbs	HeLa-S3	NF-YB	NF-YB	NFYB	NF-YB	None	HeLa-S3::NF-YB::None::narrowPeak	1.77283e-10	5.17921e-78
GM12878::RAD21::None::broadPeak	wgEncodeHaibTfbsGm12878Rad21V0416101PkRep1	NA	broadPeak	wgEncodeHaibTfbs	GM12878	Rad21	RAD21	RAD21	RAD21 (ab992)	None	GM12878::RAD21::None::broadPeak	3.78521e-10	7.67063e-08
ECC-1::FOXA1::DMSO_0.02pct::broadPeak	wgEncodeHaibTfbsEcc1Foxa1sc6553V0416102Dm002p1hPkRep1	NA	broadPeak	wgEncodeHaibTfbs	ECC-1	FOXA1_(SC-6553)	FOXA1	FOXA1	FOXA1 (sc-6553)	DMSO_0.02pct	ECC-1::FOXA1::DMSO_0.02pct::broadPeak	4.17883e-10	2.88996e-15
HeLa-S3::JunD::None::narrowPeak	wgEncodeSydhTfbsHelas3JundIggrabPk	peak	narrowPeak	wgEncodeSydhTfbs	HeLa-S3	JunD	JunD	JUND	JunD (sc-74)	None	HeLa-S3::JunD::None::narrowPeak	4.99132e-10	9.22686e-17
GM12878::TCF3::None::broadPeak	wgEncodeHaibTfbsGm12878Tcf3Pcr1xPkRep1	NA	broadPeak	wgEncodeHaibTfbs	GM12878	TCF3_(SC-349)	TCF3	TCF3	TCF3 (sc-349)	None	GM12878::TCF3::None::broadPeak	6.82501e-10	5.23505e-91
GM12878::SP1::None::broadPeak	wgEncodeHaibTfbsGm12878Sp1Pcr1xPkRep1	NA	broadPeak	wgEncodeHaibTfbs	GM12878	SP1	SP1	SP1	SP1 (sc-17824)	None	GM12878::SP1::None::broadPeak	7.26258e-10	5.04032e-123
HEK293::KAP1::None::narrowPeak	wgEncodeSydhTfbsHek293Kap1UcdPk	peak	narrowPeak	wgEncodeSydhTfbs	HEK293	KAP1	KAP1	TRIM28	KAP1 (ab10483)	None	HEK293::KAP1::None::narrowPeak	8.55113e-10	4.96316e-58
IMR90::CEBPB::None::narrowPeak	wgEncodeSydhTfbsImr90CebpbIggrabPk	peak	narrowPeak	wgEncodeSydhTfbs	IMR90	CEBPB	CEBPB	CEBPB	CEBPB (sc-150)	None	IMR90::CEBPB::None::narrowPeak	1.3123e-09	1.80077e-36
HepG2::HNF4A::None::broadPeak	wgEncodeHaibTfbsHepg2Hnf4asc8987V0416101PkRep1	NA	broadPeak	wgEncodeHaibTfbs	HepG2	HNF4A_(SC-8987)	HNF4A	HNF4A	HNF4A (sc-8987)	None	HepG2::HNF4A::None::broadPeak	1.54882e-09	1.77539e-14
GM12878::RFX5::None::narrowPeak	wgEncodeSydhTfbsGm12878Rfx5200401194IggmusPk	peak	narrowPeak	wgEncodeSydhTfbs	GM12878	RFX5_(200-401-194)	RFX5	RFX5	RFX5 (200-401-194)	None	GM12878::RFX5::None::narrowPeak	1.91535e-09	1.43988e-105
HeLa-S3::STAT1::IFNg30::narrowPeak	wgEncodeSydhTfbsHelas3Stat1Ifng30StdPk	peak	narrowPeak	wgEncodeSydhTfbs	HeLa-S3	STAT1	STAT1	STAT1	STAT1 (sc-345)	IFNg30	HeLa-S3::STAT1::IFNg30::narrowPeak	2.02812e-09	9.68334e-09
H1-hESC::USF1::None::broadPeak	wgEncodeHaibTfbsH1hescUsf1Pcr1xPkRep1	NA	broadPeak	wgEncodeHaibTfbs	H1-hESC	USF-1	USF1	USF1	USF1 (sc-229)	None	H1-hESC::USF1::None::broadPeak	2.53477e-09	9.95765e-29
K562::CHD1::NA::broadPeak	wgEncodeBroadHistoneK562Chd1a301218aStdPk	NA	broadPeak	wgEncodeBroadHistone	K562	CHD1_(A301-218A)	CHD1	CHD1	CHD1 (A301-218A)	NA	K562::CHD1::NA::broadPeak	3.59542e-09	7.49155e-58
A549::NRSF::EtOH_0.02pct::broadPeak	wgEncodeHaibTfbsA549NrsfV0422111Etoh02PkRep1	NA	broadPeak	wgEncodeHaibTfbs	A549	NRSF	NRSF	REST	NRSF	EtOH_0.02pct	A549::NRSF::EtOH_0.02pct::broadPeak	6.59766e-09	7.05708e-109
A549::P300::EtOH_0.02pct::broadPeak	wgEncodeHaibTfbsA549P300V0422111Etoh02PkRep1	NA	broadPeak	wgEncodeHaibTfbs	A549	p300	P300	EP300	P300 (sc-585)	EtOH_0.02pct	A549::P300::EtOH_0.02pct::broadPeak	6.95385e-09	1.48738e-64
HUVEC::GATA2::None::narrowPeak	wgEncodeSydhTfbsHuvecGata2UcdPk	peak	narrowPeak	wgEncodeSydhTfbs	HUVEC	GATA-2	GATA2	GATA2	GATA2	None	HUVEC::GATA2::None::narrowPeak	7.83503e-09	7.46566e-11
K562::TAL1::None::narrowPeak	wgEncodeSydhTfbsK562Tal1sc12984IggmusPk	peak	narrowPeak	wgEncodeSydhTfbs	K562	TAL1_(SC-12984)	TAL1	Tal1	TAL1 (sc-12984)	None	K562::TAL1::None::narrowPeak	8.08051e-09	4.55235e-89
HepG2::HNF4G::None::broadPeak	wgEncodeHaibTfbsHepg2Hnf4gsc6558V0416101PkRep1	NA	broadPeak	wgEncodeHaibTfbs	HepG2	HNF4G_(SC-6558)	HNF4G	HNF4G	HNF4G (sc-6558)	None	HepG2::HNF4G::None::broadPeak	9.67226e-09	1.29843e-22
GM12878::P300::None::narrowPeak	wgEncodeSydhTfbsGm12878P300IggmusPk	peak	narrowPeak	wgEncodeSydhTfbs	GM12878	p300	P300	EP300	P300 (sc-585)	None	GM12878::P300::None::narrowPeak	1.20588e-08	7.78964e-95
A549::GR::DEX_5nM::broadPeak	wgEncodeHaibTfbsA549GrPcr1xDex5nmPkRep1	NA	broadPeak	wgEncodeHaibTfbs	A549	GR	GR	NR3C1	GR (sc-1003)	DEX_5nM	A549::GR::DEX_5nM::broadPeak	1.53545e-08	2.00996e-06
K562::P300::None::narrowPeak	wgEncodeSydhTfbsK562P300IggrabPk	peak	narrowPeak	wgEncodeSydhTfbs	K562	p300	P300	EP300	P300 (sc-585)	None	K562::P300::None::narrowPeak	2.1444e-08	1.87284e-96
GM12878::ELK1::None::narrowPeak	wgEncodeSydhTfbsGm12878Elk112771IggmusPk	peak	narrowPeak	wgEncodeSydhTfbs	GM12878	ELK1_(1277-1)	ELK1	ELK1	ELK1 (1277-1)	None	GM12878::ELK1::None::narrowPeak	2.24248e-08	5.24431e-118
HUVEC::Max::None::narrowPeak	wgEncodeSydhTfbsHuvecMaxStdPk	peak	narrowPeak	wgEncodeSydhTfbs	HUVEC	Max	Max	MAX	Max (sc-197)	None	HUVEC::Max::None::narrowPeak	2.28795e-08	5.94483e-29
SK-N-SH::TAF1::None::broadPeak	wgEncodeHaibTfbsSknshTaf1V0416101PkRep1	NA	broadPeak	wgEncodeHaibTfbs	SK-N-SH	TAF1	TAF1	TAF1	TAF1 (sc-735)	None	SK-N-SH::TAF1::None::broadPeak	2.6777e-08	2.49332e-130
K562::GATA2::NA::narrowPeak	wgEncodeUchicagoTfbsK562Egata2ControlPk	peak	narrowPeak	NA	K562	eGFP-GATA2	GATA2	GATA2	GATA2 (eGFP-GATA2)	NA	K562::GATA2::NA::narrowPeak	2.84918e-08	8.44218e-47
H1-hESC::SP4::None::broadPeak	wgEncodeHaibTfbsH1hescSp4v20V0422111PkRep1	NA	broadPeak	wgEncodeHaibTfbs	H1-hESC	SP4_(V-20)	SP4	SP4	SP4 (sc-645)	None	H1-hESC::SP4::None::broadPeak	3.42806e-08	8.07357e-92
K562::TAF1::None::broadPeak	wgEncodeHaibTfbsK562Taf1V0416101PkRep1	NA	broadPeak	wgEncodeHaibTfbs	K562	TAF1	TAF1	TAF1	TAF1 (sc-735)	None	K562::TAF1::None::broadPeak	3.43423e-08	5.43573e-146
GM12878::ZEB1::None::broadPeak	wgEncodeHaibTfbsGm12878Zeb1sc25388V0416102PkRep1	NA	broadPeak	wgEncodeHaibTfbs	GM12878	ZEB1_(SC-25388)	ZEB1	ZEB1	ZEB1 (sc-25388)	None	GM12878::ZEB1::None::broadPeak	4.85658e-08	5.12988e-53
HepG2::USF1::None::broadPeak	wgEncodeHaibTfbsHepg2Usf1Pcr1xPkRep1	NA	broadPeak	wgEncodeHaibTfbs	HepG2	USF-1	USF1	USF1	USF1 (sc-229)	None	HepG2::USF1::None::broadPeak	4.9548e-08	1.6454e-33
SK-N-SH_RA::P300::None::broadPeak	wgEncodeHaibTfbsSknshraP300V0416102PkRep1	NA	broadPeak	wgEncodeHaibTfbs	SK-N-SH_RA	p300	P300	EP300	P300 (sc-585)	None	SK-N-SH_RA::P300::None::broadPeak	5.69903e-08	6.32706e-34
K562::NF-YB::None::narrowPeak	wgEncodeSydhTfbsK562NfybStdPk	peak	narrowPeak	wgEncodeSydhTfbs	K562	NF-YB	NF-YB	NFYB	NF-YB	None	K562::NF-YB::None::narrowPeak	5.73386e-08	5.20307e-63
HeLa-S3::TAF1::None::broadPeak	wgEncodeHaibTfbsHelas3Taf1Pcr1xPkRep1	NA	broadPeak	wgEncodeHaibTfbs	HeLa-S3	TAF1	TAF1	TAF1	TAF1 (sc-735)	None	HeLa-S3::TAF1::None::broadPeak	7.05214e-08	1.71094e-126
H1-hESC::HDAC2::None::broadPeak	wgEncodeHaibTfbsH1hescHdac2sc6296V0416102PkRep1	NA	broadPeak	wgEncodeHaibTfbs	H1-hESC	HDAC2_(SC-6296)	HDAC2	HDAC2	HDAC2 (sc-6296)	None	H1-hESC::HDAC2::None::broadPeak	8.17185e-08	1.53289e-12
GM12878::MTA3::None::broadPeak	wgEncodeHaibTfbsGm12878Mta3sc81325V0422111PkRep1	NA	broadPeak	wgEncodeHaibTfbs	GM12878	MTA3_(SC-81325)	MTA3	MTA3	MTA3 (sc-81325)	None	GM12878::MTA3::None::broadPeak	1.25369e-07	1.79426e-96
GM12878::E2F4::None::narrowPeak	wgEncodeSydhTfbsGm12878E2f4IggmusPk	peak	narrowPeak	wgEncodeSydhTfbs	GM12878	E2F4	E2F4	E2F4	E2F4 (sc-866)	None	GM12878::E2F4::None::narrowPeak	1.35796e-07	2.74165e-160
H1-hESC::c-Jun::None::narrowPeak	wgEncodeSydhTfbsH1hescCjunIggrabPk	peak	narrowPeak	wgEncodeSydhTfbs	H1-hESC	c-Jun	c-Jun	JUN	c-Jun (sc-1694)	None	H1-hESC::c-Jun::None::narrowPeak	1.38667e-07	1.27513e-28
A549::BHLHE40::None::narrowPeak	wgEncodeSydhTfbsA549Bhlhe40IggrabPk	peak	narrowPeak	wgEncodeSydhTfbs	A549	BHLHE40	BHLHE40	BHLHE40	BHLHE40 (sc-101023)	None	A549::BHLHE40::None::narrowPeak	1.52537e-07	6.68759e-26
HepG2::TEAD4::None::broadPeak	wgEncodeHaibTfbsHepg2Tead4sc101184V0422111PkRep1	NA	broadPeak	wgEncodeHaibTfbs	HepG2	TEAD4_(SC-101184)	TEAD4	TEAD4	TEAD4 (sc-101184)	None	HepG2::TEAD4::None::broadPeak	1.79008e-07	2.55716e-47
A549::FOSL2::EtOH_0.02pct::broadPeak	wgEncodeHaibTfbsA549Fosl2V0422111Etoh02PkRep1	NA	broadPeak	wgEncodeHaibTfbs	A549	FOSL2	FOSL2	FOSL2	FOSL2 (sc-604)	EtOH_0.02pct	A549::FOSL2::EtOH_0.02pct::broadPeak	1.88711e-07	1.33596e-54
GM12878::TBP::None::narrowPeak	wgEncodeSydhTfbsGm12878TbpIggmusPk	peak	narrowPeak	wgEncodeSydhTfbs	GM12878	TBP	TBP	TBP	TBP (ab62126)	None	GM12878::TBP::None::narrowPeak	1.97295e-07	4.79309e-114
K562::IRF1::IFNg30::narrowPeak	wgEncodeSydhTfbsK562Irf1Ifng30StdPk	peak	narrowPeak	wgEncodeSydhTfbs	K562	IRF1	IRF1	IRF1	IRF1 (sc-497)	IFNg30	K562::IRF1::IFNg30::narrowPeak	2.63057e-07	4.86576e-122
HepG2::CEBPB::forskolin::narrowPeak	wgEncodeSydhTfbsHepg2CebpbForsklnStdPk	peak	narrowPeak	wgEncodeSydhTfbs	HepG2	CEBPB	CEBPB	CEBPB	CEBPB (sc-150)	forskolin	HepG2::CEBPB::forskolin::narrowPeak	2.70135e-07	1.31448e-11
A549::GR::DEX_100nM::broadPeak	wgEncodeHaibTfbsA549GrPcr2xDex100nmPkRep1	NA	broadPeak	wgEncodeHaibTfbs	A549	GR	GR	NR3C1	GR (sc-1003)	DEX_100nM	A549::GR::DEX_100nM::broadPeak	2.80456e-07	4.02614e-11
K562::P300::NA::broadPeak	wgEncodeBroadHistoneK562P300StdPk	NA	broadPeak	wgEncodeBroadHistone	K562	p300	P300	EP300	P300 (sc-585)	NA	K562::P300::NA::broadPeak	2.86508e-07	2.37575e-39
GM12878::EZH2::NA::broadPeak	wgEncodeBroadHistoneGm12878Ezh239875Pk	NA	broadPeak	wgEncodeBroadHistone	GM12878	EZH2_(39875)	EZH2	EZH2	EZH2 (39875)	NA	GM12878::EZH2::NA::broadPeak	3.3724e-07	1.18543e-15
K562::CTCFL::None::broadPeak	wgEncodeHaibTfbsK562Ctcflsc98982V0416101PkRep1	NA	broadPeak	wgEncodeHaibTfbs	K562	CTCFL_(SC-98982)	CTCFL	CTCFL	CTCFL (sc-98982)	None	K562::CTCFL::None::broadPeak	3.40368e-07	5.14177e-17
HeLa-S3::E2F4::None::narrowPeak	wgEncodeSydhTfbsHelas3E2f4StdPk	peak	narrowPeak	wgEncodeSydhTfbs	HeLa-S3	E2F4	E2F4	E2F4	E2F4 (sc-866)	None	HeLa-S3::E2F4::None::narrowPeak	4.60222e-07	0
K562::TEAD4::None::broadPeak	wgEncodeHaibTfbsK562Tead4sc101184V0422111PkRep1	NA	broadPeak	wgEncodeHaibTfbs	K562	TEAD4_(SC-101184)	TEAD4	TEAD4	TEAD4 (sc-101184)	None	K562::TEAD4::None::broadPeak	8.07221e-07	1.85704e-99
PFSK-1::SIN3AK20::None::broadPeak	wgEncodeHaibTfbsPfsk1Sin3ak20V0416101PkRep1	NA	broadPeak	wgEncodeHaibTfbs	PFSK-1	Sin3Ak-20	SIN3AK20	SIN3A	SIN3AK20 (sc-994)	None	PFSK-1::SIN3AK20::None::broadPeak	9.00883e-07	2.88001e-106
GM12878::EGR1::None::broadPeak	wgEncodeHaibTfbsGm12878Egr1Pcr2xPkRep3	NA	broadPeak	wgEncodeHaibTfbs	GM12878	Egr-1	EGR1	EGR1	EGR1 (sc-110)	None	GM12878::EGR1::None::broadPeak	9.51244e-07	3.221e-55
HeLa-S3::c-Jun::None::narrowPeak	wgEncodeSydhTfbsHelas3CjunIggrabPk	peak	narrowPeak	wgEncodeSydhTfbs	HeLa-S3	c-Jun	c-Jun	JUN	c-Jun (sc-1694)	None	HeLa-S3::c-Jun::None::narrowPeak	1.03317e-06	1.38912e-07
GM12878::c-Myc::NA::narrowPeak	wgEncodeOpenChromChipGm12878CmycPk	peak	narrowPeak	wgEncodeOpenChromChip	GM12878	c-Myc	c-Myc	MYC	c-Myc (sc-764)	NA	GM12878::c-Myc::NA::narrowPeak	1.11396e-06	2.94327e-53
HUVEC::c-Fos::None::narrowPeak	wgEncodeSydhTfbsHuvecCfosUcdPk	peak	narrowPeak	wgEncodeSydhTfbs	HUVEC	c-Fos	c-Fos	FOS	c-Fos (sc-7202)	None	HUVEC::c-Fos::None::narrowPeak	1.28314e-06	3.1587e-14
HepG2::MBD4::None::broadPeak	wgEncodeHaibTfbsHepg2Mbd4sc271530V0422111PkRep1	NA	broadPeak	wgEncodeHaibTfbs	HepG2	MBD4_(SC-271530)	MBD4	MBD4	MBD4 (sc-271530)	None	HepG2::MBD4::None::broadPeak	1.42979e-06	6.0864e-53
K562::c-Myc::IFNg6h::narrowPeak	wgEncodeSydhTfbsK562CmycIfng6hStdPk	peak	narrowPeak	wgEncodeSydhTfbs	K562	c-Myc	c-Myc	MYC	c-Myc (sc-764)	IFNg6h	K562::c-Myc::IFNg6h::narrowPeak	1.76191e-06	8.91643e-56
HepG2::HNF4A::forskolin::narrowPeak	wgEncodeSydhTfbsHepg2Hnf4aForsklnStdPk	peak	narrowPeak	wgEncodeSydhTfbs	HepG2	HNF4A	HNF4A	HNF4A	HNF4A (sc-6556)	forskolin	HepG2::HNF4A::forskolin::narrowPeak	1.9923e-06	8.41537e-10
HepG2::SP1::None::broadPeak	wgEncodeHaibTfbsHepg2Sp1Pcr1xPkRep1	NA	broadPeak	wgEncodeHaibTfbs	HepG2	SP1	SP1	SP1	SP1 (sc-17824)	None	HepG2::SP1::None::broadPeak	2.35808e-06	3.51204e-63
HepG2::NFIC::None::broadPeak	wgEncodeHaibTfbsHepg2Nficsc81335V0422111PkRep1	NA	broadPeak	wgEncodeHaibTfbs	HepG2	NFIC_(SC-81335)	NFIC	NFIC	NFIC (sc-81335)	None	HepG2::NFIC::None::broadPeak	2.3589e-06	1.30598e-86
K562::SIN3AK20::None::broadPeak	wgEncodeHaibTfbsK562Sin3ak20V0416101PkRep1	NA	broadPeak	wgEncodeHaibTfbs	K562	Sin3Ak-20	SIN3AK20	SIN3A	SIN3AK20 (sc-994)	None	K562::SIN3AK20::None::broadPeak	2.99152e-06	2.10484e-100
GM12878::TCF12::None::broadPeak	wgEncodeHaibTfbsGm12878Tcf12Pcr1xPkRep1	NA	broadPeak	wgEncodeHaibTfbs	GM12878	TCF12	TCF12	TCF12	TCF12 (sc-357)	None	GM12878::TCF12::None::broadPeak	3.37373e-06	2.25782e-76
A549::USF1::EtOH_0.02pct::broadPeak	wgEncodeHaibTfbsA549Usf1Pcr1xEtoh02PkRep1	NA	broadPeak	wgEncodeHaibTfbs	A549	USF-1	USF1	USF1	USF1 (sc-229)	EtOH_0.02pct	A549::USF1::EtOH_0.02pct::broadPeak	4.72907e-06	5.62997e-52
A549::BCL3::EtOH_0.02pct::broadPeak	wgEncodeHaibTfbsA549Bcl3V0422111Etoh02PkRep1	NA	broadPeak	wgEncodeHaibTfbs	A549	BCL3	BCL3	BCL3	BCL3 (sc-185)	EtOH_0.02pct	A549::BCL3::EtOH_0.02pct::broadPeak	4.76972e-06	8.75214e-84
GM12878::STAT5A::None::broadPeak	wgEncodeHaibTfbsGm12878Stat5asc74442V0422111PkRep1	NA	broadPeak	wgEncodeHaibTfbs	GM12878	STAT5A_(SC-74442)	STAT5A	STAT5A	STAT5A (sc-74442)	None	GM12878::STAT5A::None::broadPeak	5.07788e-06	2.93354e-89
GM12878::YY1::None::broadPeak	wgEncodeHaibTfbsGm12878Yy1sc281Pcr1xPkRep1	NA	broadPeak	wgEncodeHaibTfbs	GM12878	YY1_(SC-281)	YY1	YY1	YY1 (sc-281)	None	GM12878::YY1::None::broadPeak	5.0872e-06	5.98542e-118
GM12878::RAD21::None::narrowPeak	wgEncodeSydhTfbsGm12878Rad21IggrabPk	peak	narrowPeak	wgEncodeSydhTfbs	GM12878	Rad21	RAD21	RAD21	RAD21 (ab992)	None	GM12878::RAD21::None::narrowPeak	8.02818e-06	0.000100274
GM12878::PML::None::broadPeak	wgEncodeHaibTfbsGm12878Pmlsc71910V0422111PkRep1	NA	broadPeak	wgEncodeHaibTfbs	GM12878	PML_(SC-71910)	PML	PML	PML (sc-71910)	None	GM12878::PML::None::broadPeak	8.43787e-06	7.67237e-124
HeLa-S3::PRDM1::None::narrowPeak	wgEncodeSydhTfbsHelas3Prdm19115IggrabPk	peak	narrowPeak	wgEncodeSydhTfbs	HeLa-S3	PRDM1_(9115)	PRDM1	PRDM1	PRDM1 (9115)	None	HeLa-S3::PRDM1::None::narrowPeak	9.05116e-06	1.19957e-12
H1-hESC::SIN3AK20::None::broadPeak	wgEncodeHaibTfbsH1hescSin3ak20Pcr1xPkRep1	NA	broadPeak	wgEncodeHaibTfbs	H1-hESC	Sin3Ak-20	SIN3AK20	SIN3A	SIN3AK20 (sc-994)	None	H1-hESC::SIN3AK20::None::broadPeak	9.48774e-06	3.4517e-79
HepG2::JunD::None::narrowPeak	wgEncodeSydhTfbsHepg2JundIggrabPk	peak	narrowPeak	wgEncodeSydhTfbs	HepG2	JunD	JunD	JUND	JunD (sc-74)	None	HepG2::JunD::None::narrowPeak	9.854e-06	9.07156e-44
H1-hESC::P300::None::broadPeak	wgEncodeHaibTfbsH1hescP300V0416102PkRep1	NA	broadPeak	wgEncodeHaibTfbs	H1-hESC	p300	P300	EP300	P300 (sc-585)	None	H1-hESC::P300::None::broadPeak	1.15161e-05	2.37509e-23
GM12878::PAX5::None::broadPeak	wgEncodeHaibTfbsGm12878Pax5c20Pcr1xPkRep1	NA	broadPeak	wgEncodeHaibTfbs	GM12878	PAX5-C20	PAX5	PAX5	PAX5 (sc-1974)	None	GM12878::PAX5::None::broadPeak	1.25251e-05	1.98075e-72
K562::NR2F2::None::broadPeak	wgEncodeHaibTfbsK562Nr2f2sc271940V0422111PkRep1	NA	broadPeak	wgEncodeHaibTfbs	K562	NR2F2_(SC-271940)	NR2F2	NR2F2	NR2F2 (sc-271940)	None	K562::NR2F2::None::broadPeak	1.25568e-05	4.66577e-79
HepG2::YY1::None::broadPeak	wgEncodeHaibTfbsHepg2Yy1sc281V0416101PkRep1	NA	broadPeak	wgEncodeHaibTfbs	HepG2	YY1_(SC-281)	YY1	YY1	YY1 (sc-281)	None	HepG2::YY1::None::broadPeak	1.35647e-05	8.51449e-96
NH-A::EZH2::NA::broadPeak	wgEncodeBroadHistoneNhaEzh239875Pk	NA	broadPeak	wgEncodeBroadHistone	NH-A	EZH2_(39875)	EZH2	EZH2	EZH2 (39875)	NA	NH-A::EZH2::NA::broadPeak	1.62983e-05	0.78963
A549::USF1::DEX_100nM::broadPeak	wgEncodeHaibTfbsA549Usf1Pcr1xDex100nmPkRep1	NA	broadPeak	wgEncodeHaibTfbs	A549	USF-1	USF1	USF1	USF1 (sc-229)	DEX_100nM	A549::USF1::DEX_100nM::broadPeak	1.69131e-05	9.84227e-42
K562::CBX3::None::broadPeak	wgEncodeHaibTfbsK562Cbx3sc101004V0422111PkRep1	NA	broadPeak	wgEncodeHaibTfbs	K562	CBX3_(SC-101004)	CBX3	CBX3	CBX3 (sc-101004)	None	K562::CBX3::None::broadPeak	1.7645e-05	5.74283e-85
H1-hESC::NRF1::None::narrowPeak	wgEncodeSydhTfbsH1hescNrf1IggrabPk	peak	narrowPeak	wgEncodeSydhTfbs	H1-hESC	Nrf1	NRF1	NRF1	NRF1 (ab55744)	None	H1-hESC::NRF1::None::narrowPeak	1.92558e-05	7.02905e-55
HEK293::TCF7L2::None::narrowPeak	wgEncodeSydhTfbsHek293Tcf7l2UcdPk	peak	narrowPeak	wgEncodeSydhTfbs	HEK293	TCF7L2	TCF7L2	TCF7L2	TCF7L2 (2569)	None	HEK293::TCF7L2::None::narrowPeak	2.01332e-05	1.46464e-10
A549::TAF1::EtOH_0.02pct::broadPeak	wgEncodeHaibTfbsA549Taf1V0422111Etoh02PkRep1	NA	broadPeak	wgEncodeHaibTfbs	A549	TAF1	TAF1	TAF1	TAF1 (sc-735)	EtOH_0.02pct	A549::TAF1::EtOH_0.02pct::broadPeak	2.03759e-05	1.16077e-101
K562::USF1::None::broadPeak	wgEncodeHaibTfbsK562Usf1V0416101PkRep1	NA	broadPeak	wgEncodeHaibTfbs	K562	USF-1	USF1	USF1	USF1 (sc-229)	None	K562::USF1::None::broadPeak	2.32085e-05	5.31384e-32
K562::IRF1::IFNa6h::narrowPeak	wgEncodeSydhTfbsK562Irf1Ifna6hStdPk	peak	narrowPeak	wgEncodeSydhTfbs	K562	IRF1	IRF1	IRF1	IRF1 (sc-497)	IFNa6h	K562::IRF1::IFNa6h::narrowPeak	2.603e-05	1.46825e-109
K562::GTF2B::None::narrowPeak	wgEncodeSydhTfbsK562Gtf2bStdPk	peak	narrowPeak	wgEncodeSydhTfbs	K562	GTF2B	GTF2B	GTF2B	GTF2B (sc-225)	None	K562::GTF2B::None::narrowPeak	2.82974e-05	2.57208e-92
K562::Bach1::None::narrowPeak	wgEncodeSydhTfbsK562Bach1sc14700IggrabPk	peak	narrowPeak	wgEncodeSydhTfbs	K562	Bach1_(sc-14700)	Bach1	BACH1	Bach1 (sc-14700)	None	K562::Bach1::None::narrowPeak	3.40536e-05	3.43379e-56
K562::ETS1::None::broadPeak	wgEncodeHaibTfbsK562Ets1V0416101PkRep1	NA	broadPeak	wgEncodeHaibTfbs	K562	ETS1	ETS1	ETS1	ETS1 (sc-350)	None	K562::ETS1::None::broadPeak	3.53121e-05	2.78237e-102
PBDE::GATA1::None::narrowPeak	wgEncodeSydhTfbsPbdeGata1UcdPk	peak	narrowPeak	wgEncodeSydhTfbs	PBDE	GATA-1	GATA1	GATA1	GATA1	None	PBDE::GATA1::None::narrowPeak	3.59964e-05	1.45379e-38
GM12878::IKZF1::None::narrowPeak	wgEncodeSydhTfbsGm12878Ikzf1iknuclaStdPk	peak	narrowPeak	wgEncodeSydhTfbs	GM12878	IKZF1_(IkN)_(UCLA)	IKZF1	IKZF1	IKZF1 (IKZF1_(IkN))	None	GM12878::IKZF1::None::narrowPeak	5.04467e-05	2.55862e-18
K562::FOS::NA::narrowPeak	wgEncodeUchicagoTfbsK562EfosControlPk	peak	narrowPeak	NA	K562	eGFP-FOS	FOS	FOS	FOS (eGFP-FOS)	NA	K562::FOS::NA::narrowPeak	6.10772e-05	8.35707e-10
NHDF-Ad::EZH2::NA::broadPeak	wgEncodeBroadHistoneNhdfadEzh239875Pk	NA	broadPeak	wgEncodeBroadHistone	NHDF-Ad	EZH2_(39875)	EZH2	EZH2	EZH2 (39875)	NA	NHDF-Ad::EZH2::NA::broadPeak	7.15577e-05	0.992673
H1-hESC::TAF7::None::broadPeak	wgEncodeHaibTfbsH1hescTaf7sc101167V0416102PkRep1	NA	broadPeak	wgEncodeHaibTfbs	H1-hESC	TAF7_(SC-101167)	TAF7	TAF7	TAF7 (sc-101167)	None	H1-hESC::TAF7::None::broadPeak	7.43612e-05	9.17434e-81
H1-hESC::NANOG::None::broadPeak	wgEncodeHaibTfbsH1hescNanogsc33759V0416102PkRep1	NA	broadPeak	wgEncodeHaibTfbs	H1-hESC	NANOG_(SC-33759)	NANOG	NANOG	NANOG (sc-33759)	None	H1-hESC::NANOG::None::broadPeak	7.85988e-05	5.09441e-30
SH-SY5Y::GATA2::None::narrowPeak	wgEncodeSydhTfbsShsy5yGata2UcdPk	peak	narrowPeak	wgEncodeSydhTfbs	SH-SY5Y	GATA-2	GATA2	GATA2	GATA2	None	SH-SY5Y::GATA2::None::narrowPeak	8.5115e-05	1.5284e-08
HeLa-S3::E2F6::None::narrowPeak	wgEncodeSydhTfbsHelas3E2f6StdPk	peak	narrowPeak	wgEncodeSydhTfbs	HeLa-S3	E2F6	E2F6	E2F6	E2F6 (sc-22823)	None	HeLa-S3::E2F6::None::narrowPeak	9.18976e-05	6.03534e-26
K562::USF2::None::narrowPeak	wgEncodeSydhTfbsK562Usf2IggrabPk	peak	narrowPeak	wgEncodeSydhTfbs	K562	USF2	USF2	USF2	USF2 (ab60931)	None	K562::USF2::None::narrowPeak	9.48548e-05	3.94247e-32
H1-hESC::EGR1::None::broadPeak	wgEncodeHaibTfbsH1hescEgr1V0416102PkRep1	NA	broadPeak	wgEncodeHaibTfbs	H1-hESC	Egr-1	EGR1	EGR1	EGR1 (sc-110)	None	H1-hESC::EGR1::None::broadPeak	0.000112157	4.48686e-14
GM12878::FOXM1::None::broadPeak	wgEncodeHaibTfbsGm12878Foxm1sc502V0422111PkRep1	NA	broadPeak	wgEncodeHaibTfbs	GM12878	FOXM1_(SC-502)	FOXM1	FOXM1	FOXM1 (sc-502)	None	GM12878::FOXM1::None::broadPeak	0.000122744	1.64944e-117
H1-hESC::RXRA::None::broadPeak	wgEncodeHaibTfbsH1hescRxraV0416102PkRep1	NA	broadPeak	wgEncodeHaibTfbs	H1-hESC	RXRA	RXRA	RXRA	RXRA (sc-553)	None	H1-hESC::RXRA::None::broadPeak	0.000136365	1.59872e-05
K562::NF-YA::None::narrowPeak	wgEncodeSydhTfbsK562NfyaStdPk	peak	narrowPeak	wgEncodeSydhTfbs	K562	NF-YA	NF-YA	NFYA	NF-YA	None	K562::NF-YA::None::narrowPeak	0.000149659	3.58121e-56
HepG2::ELF1::None::broadPeak	wgEncodeHaibTfbsHepg2Elf1sc631V0416101PkRep1	NA	broadPeak	wgEncodeHaibTfbs	HepG2	ELF1_(SC-631)	ELF1	ELF1	ELF1 (sc-631)	None	HepG2::ELF1::None::broadPeak	0.000152361	1.54002e-91
HepG2::RXRA::None::broadPeak	wgEncodeHaibTfbsHepg2RxraPcr1xPkRep1	NA	broadPeak	wgEncodeHaibTfbs	HepG2	RXRA	RXRA	RXRA	RXRA (sc-553)	None	HepG2::RXRA::None::broadPeak	0.000191801	1.43536e-06
U2OS::KAP1::None::narrowPeak	wgEncodeSydhTfbsU2osKap1UcdPk	peak	narrowPeak	wgEncodeSydhTfbs	U2OS	KAP1	KAP1	TRIM28	KAP1 (ab10483)	None	U2OS::KAP1::None::narrowPeak	0.000199276	4.22493e-65
PFSK-1::TAF1::None::broadPeak	wgEncodeHaibTfbsPfsk1Taf1V0416101PkRep1	NA	broadPeak	wgEncodeHaibTfbs	PFSK-1	TAF1	TAF1	TAF1	TAF1 (sc-735)	None	PFSK-1::TAF1::None::broadPeak	0.0002316	2.5501e-110
GM12878::BRCA1::None::narrowPeak	wgEncodeSydhTfbsGm12878Brca1a300IggmusPk	peak	narrowPeak	wgEncodeSydhTfbs	GM12878	BRCA1_(A300-000A)	BRCA1	BRCA1	BRCA1 (A300-000A)	None	GM12878::BRCA1::None::narrowPeak	0.000298765	3.87991e-69
K562::CEBPB::None::broadPeak	wgEncodeHaibTfbsK562Cebpbsc150V0422111PkRep1	NA	broadPeak	wgEncodeHaibTfbs	K562	CEBPB_(SC-150)	CEBPB	CEBPB	CEBPB (sc-150)	None	K562::CEBPB::None::broadPeak	0.000319192	4.099e-32
K562::MafF::None::narrowPeak	wgEncodeSydhTfbsK562MaffIggrabPk	peak	narrowPeak	wgEncodeSydhTfbs	K562	MafF_(M8194)	MafF	MAFF	MafF (M8194)	None	K562::MafF::None::narrowPeak	0.000363405	5.65665e-44
GM12878::NF-YA::None::narrowPeak	wgEncodeSydhTfbsGm12878NfyaIggmusPk	peak	narrowPeak	wgEncodeSydhTfbs	GM12878	NF-YA	NF-YA	NFYA	NF-YA	None	GM12878::NF-YA::None::narrowPeak	0.00039857	5.72914e-50
K562::HDAC8::NA::narrowPeak	wgEncodeUchicagoTfbsK562Ehdac8ControlPk	peak	narrowPeak	NA	K562	eGFP-HDAC8	HDAC8	HDAC8	HDAC8 (eGFP-HDAC8)	NA	K562::HDAC8::NA::narrowPeak	0.000410242	2.7619e-38
K562::EZH2::NA::broadPeak	wgEncodeBroadHistoneK562Ezh239875StdPk	NA	broadPeak	wgEncodeBroadHistone	K562	EZH2_(39875)	EZH2	EZH2	EZH2 (39875)	NA	K562::EZH2::NA::broadPeak	0.000463324	7.6102e-14
K562::NRSF::None::broadPeak	wgEncodeHaibTfbsK562NrsfV0416102PkRep1	NA	broadPeak	wgEncodeHaibTfbs	K562	NRSF	NRSF	REST	NRSF	None	K562::NRSF::None::broadPeak	0.000560493	3.26667e-37
GM12878::TAF1::None::broadPeak	wgEncodeHaibTfbsGm12878Taf1Pcr1xPkRep1	NA	broadPeak	wgEncodeHaibTfbs	GM12878	TAF1	TAF1	TAF1	TAF1 (sc-735)	None	GM12878::TAF1::None::broadPeak	0.00065265	4.10972e-105
HMEC::EZH2::NA::broadPeak	wgEncodeBroadHistoneHmecEzh239875Pk	NA	broadPeak	wgEncodeBroadHistone	HMEC	EZH2_(39875)	EZH2	EZH2	EZH2 (39875)	NA	HMEC::EZH2::NA::broadPeak	0.000667511	0.606688
K562::FOSL1::None::broadPeak	wgEncodeHaibTfbsK562Fosl1sc183V0416101PkRep1	NA	broadPeak	wgEncodeHaibTfbs	K562	FOSL1_(SC-183)	FOSL1	FOSL1	FOSL1 (sc-183)	None	K562::FOSL1::None::broadPeak	0.000725533	5.79292e-10
HCT-116::YY1::None::broadPeak	wgEncodeHaibTfbsHct116Yy1sc281V0416101PkRep1	NA	broadPeak	wgEncodeHaibTfbs	HCT-116	YY1_(SC-281)	YY1	YY1	YY1 (sc-281)	None	HCT-116::YY1::None::broadPeak	0.000905715	1.79755e-81
HepG2::FOSL2::None::broadPeak	wgEncodeHaibTfbsHepg2Fosl2V0416101PkRep1	NA	broadPeak	wgEncodeHaibTfbs	HepG2	FOSL2	FOSL2	FOSL2	FOSL2 (sc-604)	None	HepG2::FOSL2::None::broadPeak	0.000919108	7.87519e-27
NHEK::EZH2::NA::broadPeak	wgEncodeBroadHistoneNhekEzh239875Pk	NA	broadPeak	wgEncodeBroadHistone	NHEK	EZH2_(39875)	EZH2	EZH2	EZH2 (39875)	NA	NHEK::EZH2::NA::broadPeak	0.00139427	0.668283
K562::RFX5::None::narrowPeak	wgEncodeSydhTfbsK562Rfx5IggrabPk	peak	narrowPeak	wgEncodeSydhTfbs	K562	RFX5_(200-401-194)	RFX5	RFX5	RFX5 (200-401-194)	None	K562::RFX5::None::narrowPeak	0.00143589	4.3849e-72
K562::PML::None::broadPeak	wgEncodeHaibTfbsK562Pmlsc71910V0422111PkRep1	NA	broadPeak	wgEncodeHaibTfbs	K562	PML_(SC-71910)	PML	PML	PML (sc-71910)	None	K562::PML::None::broadPeak	0.00147691	8.3167e-113
K562::c-Jun::IFNa30::narrowPeak	wgEncodeSydhTfbsK562CjunIfna30StdPk	peak	narrowPeak	wgEncodeSydhTfbs	K562	c-Jun	c-Jun	JUN	c-Jun (sc-1694)	IFNa30	K562::c-Jun::IFNa30::narrowPeak	0.00155973	1.27804e-38
HepG2::JunD::None::broadPeak	wgEncodeHaibTfbsHepg2JundPcr1xPkRep1	NA	broadPeak	wgEncodeHaibTfbs	HepG2	JunD	JunD	JUND	JunD (sc-74)	None	HepG2::JunD::None::broadPeak	0.00157393	8.50255e-33
NHLF::EZH2::NA::broadPeak	wgEncodeBroadHistoneNhlfEzh239875Pk	NA	broadPeak	wgEncodeBroadHistone	NHLF	EZH2_(39875)	EZH2	EZH2	EZH2 (39875)	NA	NHLF::EZH2::NA::broadPeak	0.0016828	0.998272
K562::c-Fos::None::narrowPeak	wgEncodeSydhTfbsK562CfosStdPk	peak	narrowPeak	wgEncodeSydhTfbs	K562	c-Fos	c-Fos	FOS	c-Fos (sc-7202)	None	K562::c-Fos::None::narrowPeak	0.00180405	2.45167e-45
GM12878::POU2F2::None::broadPeak	wgEncodeHaibTfbsGm12878Pou2f2Pcr1xPkRep1	NA	broadPeak	wgEncodeHaibTfbs	GM12878	POU2F2	POU2F2	POU2F2	POU2F2 (sc-233)	None	GM12878::POU2F2::None::broadPeak	0.00237192	8.57275e-92
HeLa-S3::c-Fos::None::narrowPeak	wgEncodeSydhTfbsHelas3CfosStdPk	peak	narrowPeak	wgEncodeSydhTfbs	HeLa-S3	c-Fos	c-Fos	FOS	c-Fos (sc-7202)	None	HeLa-S3::c-Fos::None::narrowPeak	0.00255674	2.11355e-20
K562::ZNF263::None::narrowPeak	wgEncodeSydhTfbsK562Znf263UcdPk	peak	narrowPeak	wgEncodeSydhTfbs	K562	ZNF263	ZNF263	ZNF263	ZNF263 (H00010127-A01)	None	K562::ZNF263::None::narrowPeak	0.00282096	0.0148788
HepG2::EZH2::NA::broadPeak	wgEncodeBroadHistoneHepg2Ezh239875Pk	NA	broadPeak	wgEncodeBroadHistone	HepG2	EZH2_(39875)	EZH2	EZH2	EZH2 (39875)	NA	HepG2::EZH2::NA::broadPeak	0.00342171	0.00689468
SK-N-MC::FOXP2::None::broadPeak	wgEncodeHaibTfbsSknmcFoxp2Pcr2xPkRep1	NA	broadPeak	wgEncodeHaibTfbs	SK-N-MC	FOXP2	FOXP2	FOXP2	FOXP2 (ab16046)	None	SK-N-MC::FOXP2::None::broadPeak	0.0037698	8.54853e-57
GM12878::USF1::None::broadPeak	wgEncodeHaibTfbsGm12878Usf1Pcr2xPkRep1	NA	broadPeak	wgEncodeHaibTfbs	GM12878	USF-1	USF1	USF1	USF1 (sc-229)	None	GM12878::USF1::None::broadPeak	0.00464171	1.34122e-16
HepG2::MafK::None::narrowPeak	wgEncodeSydhTfbsHepg2Mafkab50322IggrabPk	peak	narrowPeak	wgEncodeSydhTfbs	HepG2	MafK_(ab50322)	MafK	MAFK	MafK (ab50322)	None	HepG2::MafK::None::narrowPeak	0.00521142	4.17631e-57
HepG2::BHLHE40::None::broadPeak	wgEncodeHaibTfbsHepg2Bhlhe40V0416101PkRep1	NA	broadPeak	wgEncodeHaibTfbs	HepG2	BHLHE40	BHLHE40	BHLHE40	BHLHE40 (sc-101023)	None	HepG2::BHLHE40::None::broadPeak	0.00554079	2.55012e-07
K562::SP1::None::broadPeak	wgEncodeHaibTfbsK562Sp1Pcr1xPkRep1	NA	broadPeak	wgEncodeHaibTfbs	K562	SP1	SP1	SP1	SP1 (sc-17824)	None	K562::SP1::None::broadPeak	0.0056409	1.54609e-42
H1-hESC::BRCA1::None::narrowPeak	wgEncodeSydhTfbsH1hescBrca1IggrabPk	peak	narrowPeak	wgEncodeSydhTfbs	H1-hESC	BRCA1_(A300-000A)	BRCA1	BRCA1	BRCA1 (A300-000A)	None	H1-hESC::BRCA1::None::narrowPeak	0.00567258	4.91138e-41
HepG2::TCF12::None::broadPeak	wgEncodeHaibTfbsHepg2Tcf12Pcr1xPkRep1	NA	broadPeak	wgEncodeHaibTfbs	HepG2	TCF12	TCF12	TCF12	TCF12 (sc-357)	None	HepG2::TCF12::None::broadPeak	0.00852928	2.57959e-07
H1-hESC::RFX5::None::narrowPeak	wgEncodeSydhTfbsH1hescRfx5200401194IggrabPk	peak	narrowPeak	wgEncodeSydhTfbs	H1-hESC	RFX5_(200-401-194)	RFX5	RFX5	RFX5 (200-401-194)	None	H1-hESC::RFX5::None::narrowPeak	0.00939143	5.93283e-17
H1-hESC::YY1::None::broadPeak	wgEncodeHaibTfbsH1hescYy1sc281V0416102PkRep1	NA	broadPeak	wgEncodeHaibTfbs	H1-hESC	YY1_(SC-281)	YY1	YY1	YY1 (sc-281)	None	H1-hESC::YY1::None::broadPeak	0.00957799	4.66853e-61
SK-N-SH_RA::YY1::None::broadPeak	wgEncodeHaibTfbsSknshraYy1sc281V0416102PkRep1	NA	broadPeak	wgEncodeHaibTfbs	SK-N-SH_RA	YY1_(SC-281)	YY1	YY1	YY1 (sc-281)	None	SK-N-SH_RA::YY1::None::broadPeak	0.00965528	2.12132e-87
HeLa-S3::GCN5::None::narrowPeak	wgEncodeSydhTfbsHelas3Gcn5StdPk	peak	narrowPeak	wgEncodeSydhTfbs	HeLa-S3	GCN5	GCN5	KAT2A	GCN5	None	HeLa-S3::GCN5::None::narrowPeak	0.00978222	1.6171e-56
GM12878::PBX3::None::broadPeak	wgEncodeHaibTfbsGm12878Pbx3Pcr1xPkRep1	NA	broadPeak	wgEncodeHaibTfbs	GM12878	Pbx3	PBX3	PBX3	PBX3 (sc-891)	None	GM12878::PBX3::None::broadPeak	0.0104099	6.92155e-29
GM19193::NFKB::TNFa::narrowPeak	wgEncodeSydhTfbsGm19193NfkbTnfaIggrabPk	peak	narrowPeak	wgEncodeSydhTfbs	GM19193	NFKB	NFKB	NFKB1	NFKB (sc-372)	TNFa	GM19193::NFKB::TNFa::narrowPeak	0.0105476	3.36045e-13
K562::c-Myc::IFNa6h::narrowPeak	wgEncodeSydhTfbsK562CmycIfna6hStdPk	peak	narrowPeak	wgEncodeSydhTfbs	K562	c-Myc	c-Myc	MYC	c-Myc (sc-764)	IFNa6h	K562::c-Myc::IFNa6h::narrowPeak	0.0105547	6.37645e-23
GM12878::BCLAF1::None::broadPeak	wgEncodeHaibTfbsGm12878Bclaf101388V0416101PkRep1	NA	broadPeak	wgEncodeHaibTfbs	GM12878	BCLAF1_(SC-101388)	BCLAF1	BCLAF1	BCLAF1 (sc-101388)	None	GM12878::BCLAF1::None::broadPeak	0.0132375	3.76758e-70
GM12878::BCL3::None::broadPeak	wgEncodeHaibTfbsGm12878Bcl3V0416101PkRep1	NA	broadPeak	wgEncodeHaibTfbs	GM12878	BCL3	BCL3	BCL3	BCL3 (sc-185)	None	GM12878::BCL3::None::broadPeak	0.0132522	1.60869e-09
SH-SY5Y::GATA3::None::narrowPeak	wgEncodeSydhTfbsShsy5yGata3sc269sc269UcdPk	peak	narrowPeak	wgEncodeSydhTfbs	SH-SY5Y	GATA3_(SC-269)	GATA3	GATA3	GATA3 (sc-269)	None	SH-SY5Y::GATA3::None::narrowPeak	0.020287	1.01306e-10
GM19099::NFKB::TNFa::narrowPeak	wgEncodeSydhTfbsGm19099NfkbTnfaIggrabPk	peak	narrowPeak	wgEncodeSydhTfbs	GM19099	NFKB	NFKB	NFKB1	NFKB (sc-372)	TNFa	GM19099::NFKB::TNFa::narrowPeak	0.0213115	5.45204e-57
HSMM::EZH2::NA::broadPeak	wgEncodeBroadHistoneHsmmEzh239875Pk	NA	broadPeak	wgEncodeBroadHistone	HSMM	EZH2_(39875)	EZH2	EZH2	EZH2 (39875)	NA	HSMM::EZH2::NA::broadPeak	0.0231575	0.449154
K562::YY1::None::broadPeak	wgEncodeHaibTfbsK562Yy1V0416102PkRep1	NA	broadPeak	wgEncodeHaibTfbs	K562	YY1	YY1	YY1	YY1 (sc-1703)	None	K562::YY1::None::broadPeak	0.0237919	5.01179e-83
HepG2::SREBP1::insulin::narrowPeak	wgEncodeSydhTfbsHepg2Srebp1InslnStdPk	peak	narrowPeak	wgEncodeSydhTfbs	HepG2	SREBP1	SREBP1	SREBF1	SREBP1 (sc-8984)	insulin	HepG2::SREBP1::insulin::narrowPeak	0.0315079	0.000847134
H1-hESC::ATF2::None::broadPeak	wgEncodeHaibTfbsH1hescAtf2sc81188V0422111PkRep1	NA	broadPeak	wgEncodeHaibTfbs	H1-hESC	ATF2_(SC-81188)	ATF2	ATF2	ATF2 (sc-81188)	None	H1-hESC::ATF2::None::broadPeak	0.0315771	8.82139e-53
GM12878::NFIC::None::broadPeak	wgEncodeHaibTfbsGm12878Nficsc81335V0422111PkRep1	NA	broadPeak	wgEncodeHaibTfbs	GM12878	NFIC_(SC-81335)	NFIC	NFIC	NFIC (sc-81335)	None	GM12878::NFIC::None::broadPeak	0.0381511	5.01976e-67
H1-hESC::SUZ12::None::narrowPeak	wgEncodeSydhTfbsH1hescSuz12UcdPk	peak	narrowPeak	wgEncodeSydhTfbs	H1-hESC	SUZ12	SUZ12	SUZ12	SUZ12 (SUZ12)	None	H1-hESC::SUZ12::None::narrowPeak	0.0390387	0.999999
K562::GATA2::None::narrowPeak	wgEncodeSydhTfbsK562Gata2UcdPk	peak	narrowPeak	wgEncodeSydhTfbs	K562	GATA-2	GATA2	GATA2	GATA2	None	K562::GATA2::None::narrowPeak	0.041012	7.3985e-05
HeLa-S3::IRF3::None::narrowPeak	wgEncodeSydhTfbsHelas3Irf3IggrabPk	peak	narrowPeak	wgEncodeSydhTfbs	HeLa-S3	IRF3	IRF3	IRF3	IRF3 (sc-9082)	None	HeLa-S3::IRF3::None::narrowPeak	0.0447149	5.60565e-45
K562::c-Jun::IFNa6h::narrowPeak	wgEncodeSydhTfbsK562CjunIfna6hStdPk	peak	narrowPeak	wgEncodeSydhTfbs	K562	c-Jun	c-Jun	JUN	c-Jun (sc-1694)	IFNa6h	K562::c-Jun::IFNa6h::narrowPeak	0.0470231	0.00411022
H1-hESC::JARID1A::NA::broadPeak	wgEncodeBroadHistoneH1hescJarid1aab26049StdPk	NA	broadPeak	wgEncodeBroadHistone	H1-hESC	JARID1A_(ab26049)	JARID1A	KDM5A	JARID1A (ab26049)	NA	H1-hESC::JARID1A::NA::broadPeak	0.0500122	4.31591e-25
HepG2::IRF3::None::narrowPeak	wgEncodeSydhTfbsHepg2Irf3IggrabPk	peak	narrowPeak	wgEncodeSydhTfbs	HepG2	IRF3	IRF3	IRF3	IRF3 (sc-9082)	None	HepG2::IRF3::None::narrowPeak	0.0504616	1.01968e-23
HepG2::NRSF::None::broadPeak	wgEncodeHaibTfbsHepg2NrsfPcr2xPkRep1	NA	broadPeak	wgEncodeHaibTfbs	HepG2	NRSF	NRSF	REST	NRSF	None	HepG2::NRSF::None::broadPeak	0.0518948	3.13189e-14
HeLa-S3::ELK4::None::narrowPeak	wgEncodeSydhTfbsHelas3Elk4UcdPk	peak	narrowPeak	wgEncodeSydhTfbs	HeLa-S3	ELK4	ELK4	ELK4	ELK4 (sc-13030)	None	HeLa-S3::ELK4::None::narrowPeak	0.0521738	4.21669e-64
K562::c-Jun::IFNg6h::narrowPeak	wgEncodeSydhTfbsK562CjunIfng6hStdPk	peak	narrowPeak	wgEncodeSydhTfbs	K562	c-Jun	c-Jun	JUN	c-Jun (sc-1694)	IFNg6h	K562::c-Jun::IFNg6h::narrowPeak	0.0537709	0.0259133
GM12891::PAX5::None::broadPeak	wgEncodeHaibTfbsGm12891Pax5c20V0416101PkRep1	NA	broadPeak	wgEncodeHaibTfbs	GM12891	PAX5-C20	PAX5	PAX5	PAX5 (sc-1974)	None	GM12891::PAX5::None::broadPeak	0.0543266	2.64487e-07
GM12891::POU2F2::None::broadPeak	wgEncodeHaibTfbsGm12891Pou2f2Pcr1xPkRep1	NA	broadPeak	wgEncodeHaibTfbs	GM12891	POU2F2	POU2F2	POU2F2	POU2F2 (sc-233)	None	GM12891::POU2F2::None::broadPeak	0.0547868	1.02816e-76
GM15510::NFKB::TNFa::narrowPeak	wgEncodeSydhTfbsGm15510NfkbTnfaIggrabPk	peak	narrowPeak	wgEncodeSydhTfbs	GM15510	NFKB	NFKB	NFKB1	NFKB (sc-372)	TNFa	GM15510::NFKB::TNFa::narrowPeak	0.054846	2.17459e-68
GM18951::NFKB::TNFa::narrowPeak	wgEncodeSydhTfbsGm18951NfkbTnfaIggrabPk	peak	narrowPeak	wgEncodeSydhTfbs	GM18951	NFKB	NFKB	NFKB1	NFKB (sc-372)	TNFa	GM18951::NFKB::TNFa::narrowPeak	0.055633	3.58793e-37
HepG2::ERRA::forskolin::narrowPeak	wgEncodeSydhTfbsHepg2ErraForsklnStdPk	peak	narrowPeak	wgEncodeSydhTfbs	HepG2	ERRA	ERRA	ESRRA	ERRA (sc-66882)	forskolin	HepG2::ERRA::forskolin::narrowPeak	0.057927	0.430722
K562::INI1::None::narrowPeak	wgEncodeSydhTfbsK562Ini1IggmusPk	peak	narrowPeak	wgEncodeSydhTfbs	K562	Ini1	INI1	SMARCB1	INI1 (sc-16189)	None	K562::INI1::None::narrowPeak	0.0600848	0.442228
K562::NELFe::None::narrowPeak	wgEncodeSydhTfbsK562NelfeStdPk	peak	narrowPeak	wgEncodeSydhTfbs	K562	NELFe	NELFe	RDBP	NELFe (sc-32912)	None	K562::NELFe::None::narrowPeak	0.0666209	1.09392e-16
GM12878::IRF3::None::narrowPeak	wgEncodeSydhTfbsGm12878Irf3IggmusPk	peak	narrowPeak	wgEncodeSydhTfbs	GM12878	IRF3	IRF3	IRF3	IRF3 (sc-9082)	None	GM12878::IRF3::None::narrowPeak	0.0681502	4.07179e-41
K562::PU1::None::broadPeak	wgEncodeHaibTfbsK562Pu1Pcr1xPkRep1	NA	broadPeak	wgEncodeHaibTfbs	K562	PU.1	PU1	SPI1	PU1 (sc-22805)	None	K562::PU1::None::broadPeak	0.0720483	2.42071e-21
H1-hESC::GABP::None::broadPeak	wgEncodeHaibTfbsH1hescGabpPcr1xPkRep1	NA	broadPeak	wgEncodeHaibTfbs	H1-hESC	GABP	GABP	GABPB1	GABP (sc-28312)	None	H1-hESC::GABP::None::broadPeak	0.0737455	8.41145e-11
K562::GATA2::None::broadPeak	wgEncodeHaibTfbsK562Gata2sc267Pcr1xPkRep1	NA	broadPeak	wgEncodeHaibTfbs	K562	GATA2_(SC-267)	GATA2	GATA2	GATA2 (sc-267)	None	K562::GATA2::None::broadPeak	0.0751008	3.98622e-05
K562::STAT1::IFNg6h::narrowPeak	wgEncodeSydhTfbsK562Stat1Ifng6hStdPk	peak	narrowPeak	wgEncodeSydhTfbs	K562	STAT1	STAT1	STAT1	STAT1 (sc-345)	IFNg6h	K562::STAT1::IFNg6h::narrowPeak	0.0773427	0.00539059
HepG2::MafF::None::narrowPeak	wgEncodeSydhTfbsHepg2Maffm8194IggrabPk	peak	narrowPeak	wgEncodeSydhTfbs	HepG2	MafF_(M8194)	MafF	MAFF	MafF (M8194)	None	HepG2::MafF::None::narrowPeak	0.0798588	3.44304e-31
GM12878::ATF2::None::broadPeak	wgEncodeHaibTfbsGm12878Atf2sc81188V0422111PkRep1	NA	broadPeak	wgEncodeHaibTfbs	GM12878	ATF2_(SC-81188)	ATF2	ATF2	ATF2 (sc-81188)	None	GM12878::ATF2::None::broadPeak	0.0827241	3.14004e-68
GM12878::c-Fos::None::narrowPeak	wgEncodeSydhTfbsGm12878CfosStdPk	peak	narrowPeak	wgEncodeSydhTfbs	GM12878	c-Fos	c-Fos	FOS	c-Fos (sc-7202)	None	GM12878::c-Fos::None::narrowPeak	0.0946375	1.50802e-36
HeLa-S3::TFIIIC-110::None::narrowPeak	wgEncodeSydhTfbsHelas3Tf3c110StdPk	peak	narrowPeak	wgEncodeSydhTfbs	HeLa-S3	TFIIIC-110	TFIIIC-110	GTF2B	TFIIIC-110 (4286)	None	HeLa-S3::TFIIIC-110::None::narrowPeak	0.0982696	1.84583e-15
HeLa-S3::RPC155::None::narrowPeak	wgEncodeSydhTfbsHelas3Rpc155StdPk	peak	narrowPeak	wgEncodeSydhTfbs	HeLa-S3	RPC155	RPC155	POLR3A	RPC155 (1900)	None	HeLa-S3::RPC155::None::narrowPeak	0.0992434	4.58089e-07
K562::c-Jun::None::narrowPeak	wgEncodeSydhTfbsK562CjunStdPk	peak	narrowPeak	wgEncodeSydhTfbs	K562	c-Jun	c-Jun	JUN	c-Jun (sc-1694)	None	K562::c-Jun::None::narrowPeak	0.103631	4.9928e-06
HepG2::TCF7L2::None::narrowPeak	wgEncodeSydhTfbsHepg2Tcf7l2UcdPk	peak	narrowPeak	wgEncodeSydhTfbs	HepG2	TCF7L2	TCF7L2	TCF7L2	TCF7L2 (2569)	None	HepG2::TCF7L2::None::narrowPeak	0.104856	0.716562
A549::GR::DEX_500pM::broadPeak	wgEncodeHaibTfbsA549GrPcr1xDex500pmPkRep1	NA	broadPeak	wgEncodeHaibTfbs	A549	GR	GR	NR3C1	GR (sc-1003)	DEX_500pM	A549::GR::DEX_500pM::broadPeak	0.105345	0.0177857
K562::ATF3::None::broadPeak	wgEncodeHaibTfbsK562Atf3V0416101PkRep1	NA	broadPeak	wgEncodeHaibTfbs	K562	ATF3	ATF3	ATF3	ATF3 (sc-188)	None	K562::ATF3::None::broadPeak	0.106207	2.37576e-33
K562::STAT5A::None::broadPeak	wgEncodeHaibTfbsK562Stat5asc74442V0422111PkRep1	NA	broadPeak	wgEncodeHaibTfbs	K562	STAT5A_(SC-74442)	STAT5A	STAT5A	STAT5A (sc-74442)	None	K562::STAT5A::None::broadPeak	0.110136	1.60754e-26
GM12878::STAT3::None::narrowPeak	wgEncodeSydhTfbsGm12878Stat3IggmusPk	peak	narrowPeak	wgEncodeSydhTfbs	GM12878	STAT3	STAT3	STAT3	STAT3 (sc-482)	None	GM12878::STAT3::None::narrowPeak	0.112172	1.35712e-28
PBDEFetal::GATA1::None::narrowPeak	wgEncodeSydhTfbsPbdefetalGata1UcdPk	peak	narrowPeak	wgEncodeSydhTfbs	PBDEFetal	GATA-1	GATA1	GATA1	GATA1	None	PBDEFetal::GATA1::None::narrowPeak	0.116516	0.000771643
GM12878::NFKB::TNFa::narrowPeak	wgEncodeSydhTfbsGm12878NfkbTnfaIggrabPk	peak	narrowPeak	wgEncodeSydhTfbs	GM12878	NFKB	NFKB	NFKB1	NFKB (sc-372)	TNFa	GM12878::NFKB::TNFa::narrowPeak	0.118207	0.000132569
GM12878::PU1::None::broadPeak	wgEncodeHaibTfbsGm12878Pu1Pcr1xPkRep2	NA	broadPeak	wgEncodeHaibTfbs	GM12878	PU.1	PU1	SPI1	PU1 (sc-22805)	None	GM12878::PU1::None::broadPeak	0.136056	6.50596e-11
NT2-D1::SUZ12::None::narrowPeak	wgEncodeSydhTfbsNt2d1Suz12UcdPk	peak	narrowPeak	wgEncodeSydhTfbs	NT2-D1	SUZ12	SUZ12	SUZ12	SUZ12 (SUZ12)	None	NT2-D1::SUZ12::None::narrowPeak	0.139943	0.998195
SK-N-SH::NRSF::None::broadPeak	wgEncodeHaibTfbsSknshNrsfPcr2xPkRep1	NA	broadPeak	wgEncodeHaibTfbs	SK-N-SH	NRSF	NRSF	REST	NRSF	None	SK-N-SH::NRSF::None::broadPeak	0.141514	1.2806e-28
K562::STAT1::IFNg30::narrowPeak	wgEncodeSydhTfbsK562Stat1Ifng30StdPk	peak	narrowPeak	wgEncodeSydhTfbs	K562	STAT1	STAT1	STAT1	STAT1 (sc-345)	IFNg30	K562::STAT1::IFNg30::narrowPeak	0.142929	0.0172603
GM12891::PU1::None::broadPeak	wgEncodeHaibTfbsGm12891Pu1Pcr1xPkRep1	NA	broadPeak	wgEncodeHaibTfbs	GM12891	PU.1	PU1	SPI1	PU1 (sc-22805)	None	GM12891::PU1::None::broadPeak	0.147419	1.87822e-07
K562::RAD21::None::narrowPeak	wgEncodeSydhTfbsK562Rad21StdPk	peak	narrowPeak	wgEncodeSydhTfbs	K562	Rad21	RAD21	RAD21	RAD21 (ab992)	None	K562::RAD21::None::narrowPeak	0.149796	0.230663
A549::FOXA1::DEX_100nM::broadPeak	wgEncodeHaibTfbsA549Foxa1V0416102Dex100nmPkRep1	NA	broadPeak	wgEncodeHaibTfbs	A549	FOXA1_(SC-101058)	FOXA1	FOXA1	FOXA1 (sc-101058)	DEX_100nM	A549::FOXA1::DEX_100nM::broadPeak	0.15887	0.217737
GM12892::TAF1::None::broadPeak	wgEncodeHaibTfbsGm12892Taf1V0416102PkRep1	NA	broadPeak	wgEncodeHaibTfbs	GM12892	TAF1	TAF1	TAF1	TAF1 (sc-735)	None	GM12892::TAF1::None::broadPeak	0.16523	7.5034e-68
K562::GABP::None::broadPeak	wgEncodeHaibTfbsK562GabpV0416101PkRep1	NA	broadPeak	wgEncodeHaibTfbs	K562	GABP	GABP	GABPB1	GABP (sc-28312)	None	K562::GABP::None::broadPeak	0.168964	4.45096e-60
K562::SETDB1::None::narrowPeak	wgEncodeSydhTfbsK562Setdb1UcdPk	peak	narrowPeak	wgEncodeSydhTfbs	K562	SETDB1	SETDB1	SETDB1	SETDB1 (11231-1-AP)	None	K562::SETDB1::None::narrowPeak	0.169496	0.000735078
K562::c-Myc::IFNa30::narrowPeak	wgEncodeSydhTfbsK562CmycIfna30StdPk	peak	narrowPeak	wgEncodeSydhTfbs	K562	c-Myc	c-Myc	MYC	c-Myc (sc-764)	IFNa30	K562::c-Myc::IFNa30::narrowPeak	0.175744	1.83697e-10
IMR90::MafK::None::narrowPeak	wgEncodeSydhTfbsImr90MafkIggrabPk	peak	narrowPeak	wgEncodeSydhTfbs	IMR90	MafK_(ab50322)	MafK	MAFK	MafK (ab50322)	None	IMR90::MafK::None::narrowPeak	0.178376	2.19792e-08
GM12878::BATF::None::broadPeak	wgEncodeHaibTfbsGm12878BatfPcr1xPkRep1	NA	broadPeak	wgEncodeHaibTfbs	GM12878	BATF	BATF	BATF	BATF (sc-100974)	None	GM12878::BATF::None::broadPeak	0.178751	3.92656e-08
K562::SP2::None::broadPeak	wgEncodeHaibTfbsK562Sp2sc643V0416102PkRep1	NA	broadPeak	wgEncodeHaibTfbs	K562	SP2_(SC-643)	SP2	SP2	SP2 (sc-643)	None	K562::SP2::None::broadPeak	0.198213	8.2069e-28
GM12878::BCL11A::None::broadPeak	wgEncodeHaibTfbsGm12878Bcl11aPcr1xPkRep1	NA	broadPeak	wgEncodeHaibTfbs	GM12878	BCL11A	BCL11A	BCL11A	BCL11A (ab19489)	None	GM12878::BCL11A::None::broadPeak	0.20432	1.61983e-05
HeLa-S3::BAF170::None::narrowPeak	wgEncodeSydhTfbsHelas3Baf170IggmusPk	peak	narrowPeak	wgEncodeSydhTfbs	HeLa-S3	BAF170	BAF170	SMARCC2	BAF170 (sc-10757)	None	HeLa-S3::BAF170::None::narrowPeak	0.212721	0.000270316
HepG2::CEBPZ::None::narrowPeak	wgEncodeSydhTfbsHepg2CebpzIggrabPk	peak	narrowPeak	wgEncodeSydhTfbs	HepG2	CEBPZ	CEBPZ	CEBPZ	CEBPZ (SAB2100398)	None	HepG2::CEBPZ::None::narrowPeak	0.223332	3.53055e-10
HepG2::SREBP2::pravastatin::narrowPeak	wgEncodeSydhTfbsHepg2Srebp2PravastStdPk	peak	narrowPeak	wgEncodeSydhTfbs	HepG2	SREBP2	SREBP2	SREBF2	SREBP2 (10007663)	pravastatin	HepG2::SREBP2::pravastatin::narrowPeak	0.224411	0.00633567
GM12892::YY1::None::broadPeak	wgEncodeHaibTfbsGm12892Yy1V0416101PkRep1	NA	broadPeak	wgEncodeHaibTfbs	GM12892	YY1	YY1	YY1	YY1 (sc-1703)	None	GM12892::YY1::None::broadPeak	0.234533	2.9537e-79
A549::ATF3::EtOH_0.02pct::broadPeak	wgEncodeHaibTfbsA549Atf3V0422111Etoh02PkRep1	NA	broadPeak	wgEncodeHaibTfbs	A549	ATF3	ATF3	ATF3	ATF3 (sc-188)	EtOH_0.02pct	A549::ATF3::EtOH_0.02pct::broadPeak	0.241889	2.99597e-37
K562::NR4A1::NA::narrowPeak	wgEncodeUchicagoTfbsK562Enr4a1ControlPk	peak	narrowPeak	NA	K562	eGFP-NR4A1	NR4A1	NR4A1	NR4A1 (eGFP-NR4A1)	NA	K562::NR4A1::NA::narrowPeak	0.249834	3.00001e-07
HeLa-S3::BRF1::None::narrowPeak	wgEncodeSydhTfbsHelas3Brf1StdPk	peak	narrowPeak	wgEncodeSydhTfbs	HeLa-S3	BRF1	BRF1	BRF1	BRF1 (128)	None	HeLa-S3::BRF1::None::narrowPeak	0.250599	0.0335149
K562::STAT1::IFNa6h::narrowPeak	wgEncodeSydhTfbsK562Stat1Ifna6hStdPk	peak	narrowPeak	wgEncodeSydhTfbs	K562	STAT1	STAT1	STAT1	STAT1 (sc-345)	IFNa6h	K562::STAT1::IFNa6h::narrowPeak	0.258907	0.000420944
K562::NRF1::None::narrowPeak	wgEncodeSydhTfbsK562Nrf1IggrabPk	peak	narrowPeak	wgEncodeSydhTfbs	K562	Nrf1	NRF1	NRF1	NRF1 (ab55744)	None	K562::NRF1::None::narrowPeak	0.26567	2.9599e-44
GM12878::MEF2C::None::broadPeak	wgEncodeHaibTfbsGm12878Mef2csc13268V0416101PkRep1	NA	broadPeak	wgEncodeHaibTfbs	GM12878	MEF2C_(SC-13268)	MEF2C	MEF2C	MEF2C (sc-13268)	None	GM12878::MEF2C::None::broadPeak	0.267757	0.000410209
GM12878::MEF2A::None::broadPeak	wgEncodeHaibTfbsGm12878Mef2aPcr1xPkRep1	NA	broadPeak	wgEncodeHaibTfbs	GM12878	MEF2A	MEF2A	MEF2A	MEF2A (sc-313)	None	GM12878::MEF2A::None::broadPeak	0.268553	1.22627e-06
HepG2::c-Jun::None::narrowPeak	wgEncodeSydhTfbsHepg2CjunIggrabPk	peak	narrowPeak	wgEncodeSydhTfbs	HepG2	c-Jun	c-Jun	JUN	c-Jun (sc-1694)	None	HepG2::c-Jun::None::narrowPeak	0.285626	6.42408e-08
GM12878::P300::None::broadPeak	wgEncodeHaibTfbsGm12878P300Pcr1xPkRep1	NA	broadPeak	wgEncodeHaibTfbs	GM12878	p300	P300	EP300	P300 (sc-585)	None	GM12878::P300::None::broadPeak	0.28661	3.60426e-11
GM12878::NF-E2::None::narrowPeak	wgEncodeSydhTfbsGm12878Nfe2sc22827StdPk	peak	narrowPeak	wgEncodeSydhTfbs	GM12878	NF-E2_(SC-22827)	NF-E2	NFE2	NF-E2 (sc-22827)	None	GM12878::NF-E2::None::narrowPeak	0.293874	8.00225e-26
U2OS::SETDB1::None::narrowPeak	wgEncodeSydhTfbsU2osSetdb1UcdPk	peak	narrowPeak	wgEncodeSydhTfbs	U2OS	SETDB1	SETDB1	SETDB1	SETDB1 (11231-1-AP)	None	U2OS::SETDB1::None::narrowPeak	0.294819	1.35419e-23
H1-hESC::MafK::None::narrowPeak	wgEncodeSydhTfbsH1hescMafkIggrabPk	peak	narrowPeak	wgEncodeSydhTfbs	H1-hESC	MafK_(ab50322)	MafK	MAFK	MafK (ab50322)	None	H1-hESC::MafK::None::narrowPeak	0.295398	6.27026e-10
GM12878::JunD::None::narrowPeak	wgEncodeSydhTfbsGm12878JundStdPk	peak	narrowPeak	wgEncodeSydhTfbs	GM12878	JunD	JunD	JUND	JunD (sc-74)	None	GM12878::JunD::None::narrowPeak	0.30562	0.458385
HepG2::SP2::None::broadPeak	wgEncodeHaibTfbsHepg2Sp2V0422111PkRep1	NA	broadPeak	wgEncodeHaibTfbs	HepG2	SP2_(SC-643)	SP2	SP2	SP2 (sc-643)	None	HepG2::SP2::None::broadPeak	0.307654	2.93399e-21
HepG2::SRF::None::broadPeak	wgEncodeHaibTfbsHepg2SrfV0416101PkRep1	NA	broadPeak	wgEncodeHaibTfbs	HepG2	SRF	SRF	SRF	SRF (sc-335)	None	HepG2::SRF::None::broadPeak	0.326349	5.72082e-12
GM12892::NFKB::TNFa::narrowPeak	wgEncodeSydhTfbsGm12892NfkbTnfaIggrabPk	peak	narrowPeak	wgEncodeSydhTfbs	GM12892	NFKB	NFKB	NFKB1	NFKB (sc-372)	TNFa	GM12892::NFKB::TNFa::narrowPeak	0.333968	1.20855e-07
K562::BRG1::None::narrowPeak	wgEncodeSydhTfbsK562Brg1IggmusPk	peak	narrowPeak	wgEncodeSydhTfbs	K562	Brg1	BRG1	SMARCA4	BRG1 (sc-17796)	None	K562::BRG1::None::narrowPeak	0.338179	0.114554
PANC-1::NRSF::None::broadPeak	wgEncodeHaibTfbsPanc1NrsfPcr2xPkRep1	NA	broadPeak	wgEncodeHaibTfbs	PANC-1	NRSF	NRSF	REST	NRSF	None	PANC-1::NRSF::None::broadPeak	0.356938	3.16365e-14
H1-hESC::SP2::None::broadPeak	wgEncodeHaibTfbsH1hescSp2V0422111PkRep1	NA	broadPeak	wgEncodeHaibTfbs	H1-hESC	SP2_(SC-643)	SP2	SP2	SP2 (sc-643)	None	H1-hESC::SP2::None::broadPeak	0.372451	4.74248e-14
A549::YY1::EtOH_0.02pct::broadPeak	wgEncodeHaibTfbsA549Yy1cV0422111Etoh02PkRep1	NA	broadPeak	wgEncodeHaibTfbs	A549	YY1_(SC-281)	YY1	YY1	YY1 (sc-281)	EtOH_0.02pct	A549::YY1::EtOH_0.02pct::broadPeak	0.373332	9.1565e-63
GM18505::NFKB::TNFa::narrowPeak	wgEncodeSydhTfbsGm18505NfkbTnfaIggrabPk	peak	narrowPeak	wgEncodeSydhTfbs	GM18505	NFKB	NFKB	NFKB1	NFKB (sc-372)	TNFa	GM18505::NFKB::TNFa::narrowPeak	0.381423	2.19427e-11
GM12891::TAF1::None::broadPeak	wgEncodeHaibTfbsGm12891Taf1Pcr1xPkRep1	NA	broadPeak	wgEncodeHaibTfbs	GM12891	TAF1	TAF1	TAF1	TAF1 (sc-735)	None	GM12891::TAF1::None::broadPeak	0.392175	6.89551e-65
GM18526::NFKB::TNFa::narrowPeak	wgEncodeSydhTfbsGm18526NfkbTnfaIggrabPk	peak	narrowPeak	wgEncodeSydhTfbs	GM18526	NFKB	NFKB	NFKB1	NFKB (sc-372)	TNFa	GM18526::NFKB::TNFa::narrowPeak	0.393107	7.70378e-06
K562::GATA1::None::narrowPeak	wgEncodeSydhTfbsK562Gata1UcdPk	peak	narrowPeak	wgEncodeSydhTfbs	K562	GATA-1	GATA1	GATA1	GATA1	None	K562::GATA1::None::narrowPeak	0.393482	0.279929
K562::STAT2::IFNa6h::narrowPeak	wgEncodeSydhTfbsK562Stat2Ifna6hStdPk	peak	narrowPeak	wgEncodeSydhTfbs	K562	STAT2	STAT2	STAT2	STAT2 (sc-476x)	IFNa6h	K562::STAT2::IFNa6h::narrowPeak	0.400966	5.18521e-06
GM12878::NFATC1::None::broadPeak	wgEncodeHaibTfbsGm12878Nfatc1sc17834V0422111PkRep1	NA	broadPeak	wgEncodeHaibTfbs	GM12878	NFATC1_(SC-17834)	NFATC1	NFATC	NFATC1 (sc-17834)	None	GM12878::NFATC1::None::broadPeak	0.404177	4.04761e-38
HeLa-S3::NRSF::None::broadPeak	wgEncodeHaibTfbsHelas3NrsfPcr1xPkRep1	NA	broadPeak	wgEncodeHaibTfbs	HeLa-S3	NRSF	NRSF	REST	NRSF	None	HeLa-S3::NRSF::None::broadPeak	0.412912	7.23192e-07
A549::ELF1::EtOH_0.02pct::broadPeak	wgEncodeHaibTfbsA549Elf1V0422111Etoh02PkRep1	NA	broadPeak	wgEncodeHaibTfbs	A549	ELF1_(SC-631)	ELF1	ELF1	ELF1 (sc-631)	EtOH_0.02pct	A549::ELF1::EtOH_0.02pct::broadPeak	0.413571	8.13096e-55
K562::c-Jun::IFNg30::narrowPeak	wgEncodeSydhTfbsK562CjunIfng30StdPk	peak	narrowPeak	wgEncodeSydhTfbs	K562	c-Jun	c-Jun	JUN	c-Jun (sc-1694)	IFNg30	K562::c-Jun::IFNg30::narrowPeak	0.418123	0.000693942
GM12878::ZNF274::None::narrowPeak	wgEncodeSydhTfbsGm12878Znf274StdPk	peak	narrowPeak	wgEncodeSydhTfbs	GM12878	ZNF274	ZNF274	ZNF274	ZNF274 (H00010782-A01)	None	GM12878::ZNF274::None::narrowPeak	0.428177	0.359018
GM12878::RXRA::None::broadPeak	wgEncodeHaibTfbsGm12878RxraPcr1xPkRep1	NA	broadPeak	wgEncodeHaibTfbs	GM12878	RXRA	RXRA	RXRA	RXRA (sc-553)	None	GM12878::RXRA::None::broadPeak	0.429006	3.13561e-18
HUVEC::c-Jun::None::narrowPeak	wgEncodeSydhTfbsHuvecCjunStdPk	peak	narrowPeak	wgEncodeSydhTfbs	HUVEC	c-Jun	c-Jun	JUN	c-Jun (sc-1694)	None	HUVEC::c-Jun::None::narrowPeak	0.430862	0.00577697
K562::MEF2A::None::broadPeak	wgEncodeHaibTfbsK562Mef2aV0416101PkRep1	NA	broadPeak	wgEncodeHaibTfbs	K562	MEF2A	MEF2A	MEF2A	MEF2A (sc-313)	None	K562::MEF2A::None::broadPeak	0.432751	6.93367e-05
GM12891::NFKB::TNFa::narrowPeak	wgEncodeSydhTfbsGm12891NfkbTnfaIggrabPk	peak	narrowPeak	wgEncodeSydhTfbs	GM12891	NFKB	NFKB	NFKB1	NFKB (sc-372)	TNFa	GM12891::NFKB::TNFa::narrowPeak	0.435583	6.81677e-09
HepG2::SREBP1::pravastatin::narrowPeak	wgEncodeSydhTfbsHepg2Srebp1PravastStdPk	peak	narrowPeak	wgEncodeSydhTfbs	HepG2	SREBP1	SREBP1	SREBF1	SREBP1 (sc-8984)	pravastatin	HepG2::SREBP1::pravastatin::narrowPeak	0.442248	0.019604
GM12891::YY1::None::broadPeak	wgEncodeHaibTfbsGm12891Yy1sc281V0416101PkRep1	NA	broadPeak	wgEncodeHaibTfbs	GM12891	YY1_(SC-281)	YY1	YY1	YY1 (sc-281)	None	GM12891::YY1::None::broadPeak	0.442281	1.0972e-68
H1-hESC::FOSL1::None::broadPeak	wgEncodeHaibTfbsH1hescFosl1sc183V0416102PkRep1	NA	broadPeak	wgEncodeHaibTfbs	H1-hESC	FOSL1_(SC-183)	FOSL1	FOSL1	FOSL1 (sc-183)	None	H1-hESC::FOSL1::None::broadPeak	0.467025	0.00129137
K562::STAT1::IFNa30::narrowPeak	wgEncodeSydhTfbsK562Stat1Ifna30StdPk	peak	narrowPeak	wgEncodeSydhTfbs	K562	STAT1	STAT1	STAT1	STAT1 (sc-345)	IFNa30	K562::STAT1::IFNa30::narrowPeak	0.492632	0.00105667
K562::BRF1::None::narrowPeak	wgEncodeSydhTfbsK562Brf1StdPk	peak	narrowPeak	wgEncodeSydhTfbs	K562	BRF1	BRF1	BRF1	BRF1 (128)	None	K562::BRF1::None::narrowPeak	0.5	0.5
H1-hESC::BCL11A::None::broadPeak	wgEncodeHaibTfbsH1hescBcl11aPcr1xPkRep1	NA	broadPeak	wgEncodeHaibTfbs	H1-hESC	BCL11A	BCL11A	BCL11A	BCL11A (ab19489)	None	H1-hESC::BCL11A::None::broadPeak	0.515139	0.10567
GM10847::NFKB::TNFa::narrowPeak	wgEncodeSydhTfbsGm10847NfkbTnfaIggrabPk	peak	narrowPeak	wgEncodeSydhTfbs	GM10847	NFKB	NFKB	NFKB1	NFKB (sc-372)	TNFa	GM10847::NFKB::TNFa::narrowPeak	0.518555	4.96434e-21
NT2-D1::ZNF274::None::narrowPeak	wgEncodeSydhTfbsNt2d1Znf274UcdPk	peak	narrowPeak	wgEncodeSydhTfbs	NT2-D1	ZNF274	ZNF274	ZNF274	ZNF274 (H00010782-A01)	None	NT2-D1::ZNF274::None::narrowPeak	0.532126	0.523951
PFSK-1::NRSF::None::broadPeak	wgEncodeHaibTfbsPfsk1NrsfPcr2xPkRep1	NA	broadPeak	wgEncodeHaibTfbs	PFSK-1	NRSF	NRSF	REST	NRSF	None	PFSK-1::NRSF::None::broadPeak	0.539127	2.02948e-12
HeLa-S3::ZZZ3::None::narrowPeak	wgEncodeSydhTfbsHelas3Zzz3StdPk	peak	narrowPeak	wgEncodeSydhTfbs	HeLa-S3	ZZZ3	ZZZ3	ZZZ3	ZZZ3	None	HeLa-S3::ZZZ3::None::narrowPeak	0.565241	0.0794911
K562::NF-E2::None::narrowPeak	wgEncodeSydhTfbsK562Nfe2StdPk	peak	narrowPeak	wgEncodeSydhTfbs	K562	NF-E2	NF-E2	NFE2	NF-E2 (sc-291)	None	K562::NF-E2::None::narrowPeak	0.568727	0.00472698
K562::STAT2::IFNa30::narrowPeak	wgEncodeSydhTfbsK562Stat2Ifna30StdPk	peak	narrowPeak	wgEncodeSydhTfbs	K562	STAT2	STAT2	STAT2	STAT2 (sc-476x)	IFNa30	K562::STAT2::IFNa30::narrowPeak	0.570823	0.000727863
HepG2::ZNF274::None::narrowPeak	wgEncodeSydhTfbsHepg2Znf274UcdPk	peak	narrowPeak	wgEncodeSydhTfbs	HepG2	ZNF274	ZNF274	ZNF274	ZNF274 (H00010782-A01)	None	HepG2::ZNF274::None::narrowPeak	0.590744	0.470532
GM12878::ZZZ3::None::narrowPeak	wgEncodeSydhTfbsGm12878Zzz3StdPk	peak	narrowPeak	wgEncodeSydhTfbs	GM12878	ZZZ3	ZZZ3	ZZZ3	ZZZ3	None	GM12878::ZZZ3::None::narrowPeak	0.591476	0.318782
HepG2::HSF1::forskolin::narrowPeak	wgEncodeSydhTfbsHepg2Hsf1ForsklnStdPk	peak	narrowPeak	wgEncodeSydhTfbs	HepG2	HSF1	HSF1	HSF1	HSF1 (sc-9144)	forskolin	HepG2::HSF1::forskolin::narrowPeak	0.60974	0.0102236
K562::XRCC4::None::narrowPeak	wgEncodeSydhTfbsK562Xrcc4StdPk	peak	narrowPeak	wgEncodeSydhTfbs	K562	XRCC4	XRCC4	XRCC4	XRCC4 (ab145)	None	K562::XRCC4::None::narrowPeak	0.610723	0.493391
K562::IRF1::IFNa30::narrowPeak	wgEncodeSydhTfbsK562Irf1Ifna30StdPk	peak	narrowPeak	wgEncodeSydhTfbs	K562	IRF1	IRF1	IRF1	IRF1 (sc-497)	IFNa30	K562::IRF1::IFNa30::narrowPeak	0.64602	0.000385477
K562::BDP1::None::narrowPeak	wgEncodeSydhTfbsK562Bdp1StdPk	peak	narrowPeak	wgEncodeSydhTfbs	K562	BDP1	BDP1	BDP1	BDP1 (2663)	None	K562::BDP1::None::narrowPeak	0.648276	0.0239462
GM08714::ZNF274::None::narrowPeak	wgEncodeSydhTfbsGm08714Znf274UcdPk	peak	narrowPeak	wgEncodeSydhTfbs	GM08714	ZNF274	ZNF274	ZNF274	ZNF274 (H00010782-A01)	None	GM08714::ZNF274::None::narrowPeak	0.652156	0.452122
K562::BRF2::None::narrowPeak	wgEncodeSydhTfbsK562Brf2StdPk	peak	narrowPeak	wgEncodeSydhTfbs	K562	BRF2	BRF2	BRF2	BRF2 (4295)	None	K562::BRF2::None::narrowPeak	0.657069	0.297751
K562::RPC155::None::narrowPeak	wgEncodeSydhTfbsK562Rpc155StdPk	peak	narrowPeak	wgEncodeSydhTfbs	K562	RPC155	RPC155	POLR3A	RPC155 (1900)	None	K562::RPC155::None::narrowPeak	0.657198	0.0319281
H1-hESC::POU5F1::None::broadPeak	wgEncodeHaibTfbsH1hescPou5f1sc9081V0416102PkRep1	NA	broadPeak	wgEncodeHaibTfbs	H1-hESC	POU5F1_(SC-9081)	POU5F1	POU5F1	POU5F1 (sc-9081)	None	H1-hESC::POU5F1::None::broadPeak	0.664159	0.240537
H1-hESC::NRSF::None::broadPeak	wgEncodeHaibTfbsH1hescNrsfV0416102PkRep1	NA	broadPeak	wgEncodeHaibTfbs	H1-hESC	NRSF	NRSF	REST	NRSF	None	H1-hESC::NRSF::None::broadPeak	0.66456	0.0251733
HeLa-S3::BRF2::None::narrowPeak	wgEncodeSydhTfbsHelas3Brf2StdPk	peak	narrowPeak	wgEncodeSydhTfbs	HeLa-S3	BRF2	BRF2	BRF2	BRF2 (4295)	None	HeLa-S3::BRF2::None::narrowPeak	0.674338	0.416872
HepG2::PGC1A::forskolin::narrowPeak	wgEncodeSydhTfbsHepg2Pgc1aForsklnStdPk	peak	narrowPeak	wgEncodeSydhTfbs	HepG2	PGC1A	PGC1A	PPARGC1A	PGC1A (sc-13067)	forskolin	HepG2::PGC1A::forskolin::narrowPeak	0.678843	0.168232
A549::GABP::EtOH_0.02pct::broadPeak	wgEncodeHaibTfbsA549GabpV0422111Etoh02PkRep1	NA	broadPeak	wgEncodeHaibTfbs	A549	GABP	GABP	GABPB1	GABP (sc-28312)	EtOH_0.02pct	A549::GABP::EtOH_0.02pct::broadPeak	0.686984	7.43398e-49
GM12878::SRF::None::broadPeak	wgEncodeHaibTfbsGm12878SrfPcr2xPkRep1	NA	broadPeak	wgEncodeHaibTfbs	GM12878	SRF	SRF	SRF	SRF (sc-335)	None	GM12878::SRF::None::broadPeak	0.712834	1.21135e-10
HeLa-S3::ZNF274::None::narrowPeak	wgEncodeSydhTfbsHelas3Znf274UcdPk	peak	narrowPeak	wgEncodeSydhTfbs	HeLa-S3	ZNF274	ZNF274	ZNF274	ZNF274 (H00010782-A01)	None	HeLa-S3::ZNF274::None::narrowPeak	0.722732	0.60672
A549::ETS1::EtOH_0.02pct::broadPeak	wgEncodeHaibTfbsA549Ets1V0422111Etoh02PkRep1	NA	broadPeak	wgEncodeHaibTfbs	A549	ETS1	ETS1	ETS1	ETS1 (sc-350)	EtOH_0.02pct	A549::ETS1::EtOH_0.02pct::broadPeak	0.736967	1.06757e-56
HeLa-S3::SPT20::None::narrowPeak	wgEncodeSydhTfbsHelas3Spt20StdPk	peak	narrowPeak	wgEncodeSydhTfbs	HeLa-S3	SPT20	SPT20	FAM48A	SPT20	None	HeLa-S3::SPT20::None::narrowPeak	0.742131	0.230768
H1-hESC::c-Myc::NA::narrowPeak	wgEncodeOpenChromChipH1hescCmycPk	peak	narrowPeak	wgEncodeOpenChromChip	H1-hESC	c-Myc	c-Myc	MYC	c-Myc (sc-764)	NA	H1-hESC::c-Myc::NA::narrowPeak	0.747189	0.999044
HCT-116::ZBTB33::None::broadPeak	wgEncodeHaibTfbsHct116Zbtb33V0416101PkRep1	NA	broadPeak	wgEncodeHaibTfbs	HCT-116	ZBTB33	ZBTB33	ZBTB33	ZBTB33 (sc-23871)	None	HCT-116::ZBTB33::None::broadPeak	0.75102	1.54267e-22
GM12878::GCN5::None::narrowPeak	wgEncodeSydhTfbsGm12878Gcn5StdPk	peak	narrowPeak	wgEncodeSydhTfbs	GM12878	GCN5	GCN5	KAT2A	GCN5	None	GM12878::GCN5::None::narrowPeak	0.759755	2.01873e-20
K562::ATF1::None::narrowPeak	wgEncodeSydhTfbsK562Atf106325StdPk	peak	narrowPeak	wgEncodeSydhTfbs	K562	ATF1_(06-325)	ATF1	ATF1	ATF1 (06-325)	None	K562::ATF1::None::narrowPeak	0.797455	2.31242e-34
HepG2::NRF1::None::narrowPeak	wgEncodeSydhTfbsHepg2Nrf1IggrabPk	peak	narrowPeak	wgEncodeSydhTfbs	HepG2	Nrf1	NRF1	NRF1	NRF1 (ab55744)	None	HepG2::NRF1::None::narrowPeak	0.805032	2.39554e-15
K562::THAP1::None::broadPeak	wgEncodeHaibTfbsK562Thap1sc98174V0416101PkRep1	NA	broadPeak	wgEncodeHaibTfbs	K562	THAP1_(SC-98174)	THAP1	THAP1	THAP1 (sc-98174)	None	K562::THAP1::None::broadPeak	0.819211	1.52023e-18
K562::TFIIIC-110::None::narrowPeak	wgEncodeSydhTfbsK562Tf3c110StdPk	peak	narrowPeak	wgEncodeSydhTfbs	K562	TFIIIC-110	TFIIIC-110	GTF2B	TFIIIC-110 (4286)	None	K562::TFIIIC-110::None::narrowPeak	0.820295	1.60901e-05
HeLa-S3::BDP1::None::narrowPeak	wgEncodeSydhTfbsHelas3Bdp1StdPk	peak	narrowPeak	wgEncodeSydhTfbs	HeLa-S3	BDP1	BDP1	BDP1	BDP1 (2663)	None	HeLa-S3::BDP1::None::narrowPeak	0.826196	0.222535
HEK293::ELK4::None::narrowPeak	wgEncodeSydhTfbsHek293Elk4UcdPk	peak	narrowPeak	wgEncodeSydhTfbs	HEK293	ELK4	ELK4	ELK4	ELK4 (sc-13030)	None	HEK293::ELK4::None::narrowPeak	0.873572	1.67061e-14
K562::SRF::None::broadPeak	wgEncodeHaibTfbsK562SrfV0416101PkRep1	NA	broadPeak	wgEncodeHaibTfbs	K562	SRF	SRF	SRF	SRF (sc-335)	None	K562::SRF::None::broadPeak	0.887634	2.10867e-08
GM12878::NRSF::None::broadPeak	wgEncodeHaibTfbsGm12878NrsfPcr1xPkRep1	NA	broadPeak	wgEncodeHaibTfbs	GM12878	NRSF	NRSF	REST	NRSF	None	GM12878::NRSF::None::broadPeak	0.891542	0.0139652
H1-hESC::SRF::None::broadPeak	wgEncodeHaibTfbsH1hescSrfPcr1xPkRep1	NA	broadPeak	wgEncodeHaibTfbs	H1-hESC	SRF	SRF	SRF	SRF (sc-335)	None	H1-hESC::SRF::None::broadPeak	0.896456	0.000694232
A549::ZBTB33::EtOH_0.02pct::broadPeak	wgEncodeHaibTfbsA549Zbtb33V0422111Etoh02PkRep1	NA	broadPeak	wgEncodeHaibTfbs	A549	ZBTB33	ZBTB33	ZBTB33	ZBTB33 (sc-23871)	EtOH_0.02pct	A549::ZBTB33::EtOH_0.02pct::broadPeak	0.909846	3.02427e-32
K562::KAP1::None::narrowPeak	wgEncodeSydhTfbsK562Kap1UcdPk	peak	narrowPeak	wgEncodeSydhTfbs	K562	KAP1	KAP1	TRIM28	KAP1 (ab10483)	None	K562::KAP1::None::narrowPeak	0.914603	7.05387e-15
GM12878::SPT20::None::narrowPeak	wgEncodeSydhTfbsGm12878Spt20StdPk	peak	narrowPeak	wgEncodeSydhTfbs	GM12878	SPT20	SPT20	FAM48A	SPT20	None	GM12878::SPT20::None::narrowPeak	0.916909	0.000163066
GM12878::TR4::None::narrowPeak	wgEncodeSydhTfbsGm12878Tr4StdPk	peak	narrowPeak	wgEncodeSydhTfbs	GM12878	TR4	TR4	nr2c2	TR4	None	GM12878::TR4::None::narrowPeak	0.919425	0.0783134
GM12878::IRF4::None::broadPeak	wgEncodeHaibTfbsGm12878Irf4sc6059Pcr1xPkRep1	NA	broadPeak	wgEncodeHaibTfbs	GM12878	IRF4_(SC-6059)	IRF4	IRF4	IRF4 (sc-6059)	None	GM12878::IRF4::None::broadPeak	0.921044	5.40261e-11
K562::TR4::None::narrowPeak	wgEncodeSydhTfbsK562Tr4UcdPk	peak	narrowPeak	wgEncodeSydhTfbs	K562	TR4	TR4	nr2c2	TR4	None	K562::TR4::None::narrowPeak	0.924568	0.113181
H1-hESC::ATF3::None::broadPeak	wgEncodeHaibTfbsH1hescAtf3V0416102PkRep1	NA	broadPeak	wgEncodeHaibTfbs	H1-hESC	ATF3	ATF3	ATF3	ATF3 (sc-188)	None	H1-hESC::ATF3::None::broadPeak	0.929668	1.15977e-06
K562::TAF7::None::broadPeak	wgEncodeHaibTfbsK562Taf7sc101167V0416101PkRep1	NA	broadPeak	wgEncodeHaibTfbs	K562	TAF7_(SC-101167)	TAF7	TAF7	TAF7 (sc-101167)	None	K562::TAF7::None::broadPeak	0.932902	2.52782e-16
HepG2::ATF3::None::broadPeak	wgEncodeHaibTfbsHepg2Atf3V0416101PkRep1	NA	broadPeak	wgEncodeHaibTfbs	HepG2	ATF3	ATF3	ATF3	ATF3 (sc-188)	None	HepG2::ATF3::None::broadPeak	0.935877	1.06265e-05
U87::NRSF::None::broadPeak	wgEncodeHaibTfbsU87NrsfPcr2xPkRep1V2	NA	broadPeak	wgEncodeHaibTfbs	U87	NRSF	NRSF	REST	NRSF	None	U87::NRSF::None::broadPeak	0.942387	0.970257
K562::BCLAF1::None::broadPeak	wgEncodeHaibTfbsK562Bclaf101388Pcr1xPkRep1	NA	broadPeak	wgEncodeHaibTfbs	K562	BCLAF1_(SC-101388)	BCLAF1	BCLAF1	BCLAF1 (sc-101388)	None	K562::BCLAF1::None::broadPeak	0.955429	1.18017e-13
HepG2::GABP::None::broadPeak	wgEncodeHaibTfbsHepg2GabpPcr2xPkRep1	NA	broadPeak	wgEncodeHaibTfbs	HepG2	GABP	GABP	GABPB1	GABP (sc-28312)	None	HepG2::GABP::None::broadPeak	0.959951	3.15741e-26
GM12878::YY1::None::narrowPeak	wgEncodeSydhTfbsGm12878Yy1StdPk	peak	narrowPeak	wgEncodeSydhTfbs	GM12878	YY1	YY1	YY1	YY1 (sc-1703)	None	GM12878::YY1::None::narrowPeak	0.962395	1.1514e-05
GM12878::ATF3::None::broadPeak	wgEncodeHaibTfbsGm12878Atf3Pcr1xPkRep1	NA	broadPeak	wgEncodeHaibTfbs	GM12878	ATF3	ATF3	ATF3	ATF3 (sc-188)	None	GM12878::ATF3::None::broadPeak	0.968558	3.46745e-06
K562::SIRT6::None::narrowPeak	wgEncodeSydhTfbsK562Sirt6StdPk	peak	narrowPeak	wgEncodeSydhTfbs	K562	SIRT6	SIRT6	SIRT6	SIRT6 (ab48192)	None	K562::SIRT6::None::narrowPeak	0.968954	0.213547
HeLa-S3::NRF1::None::narrowPeak	wgEncodeSydhTfbsHelas3Nrf1IggmusPk	peak	narrowPeak	wgEncodeSydhTfbs	HeLa-S3	Nrf1	NRF1	NRF1	NRF1 (ab55744)	None	HeLa-S3::NRF1::None::narrowPeak	0.973699	1.22503e-15
HepG2::GRp20::forskolin::narrowPeak	wgEncodeSydhTfbsHepg2Grp20ForsklnStdPk	peak	narrowPeak	wgEncodeSydhTfbs	HepG2	GRp20	GRp20	NR3C1	GRp20 (sc-1002)	forskolin	HepG2::GRp20::forskolin::narrowPeak	0.980524	0.478617
GM12878::ETS1::None::broadPeak	wgEncodeHaibTfbsGm12878Ets1Pcr1xPkRep1V2	NA	broadPeak	wgEncodeHaibTfbs	GM12878	ETS1	ETS1	ETS1	ETS1 (sc-350)	None	GM12878::ETS1::None::broadPeak	0.98226	1.60617e-20
HepG2::ZBTB33::None::broadPeak	wgEncodeHaibTfbsHepg2Zbtb33Pcr1xPkRep1	NA	broadPeak	wgEncodeHaibTfbs	HepG2	ZBTB33	ZBTB33	ZBTB33	ZBTB33 (sc-23871)	None	HepG2::ZBTB33::None::broadPeak	0.9853	6.28401e-12
A549::SIX5::EtOH_0.02pct::broadPeak	wgEncodeHaibTfbsA549Six5V0422111Etoh02PkRep1	NA	broadPeak	wgEncodeHaibTfbs	A549	SIX5	SIX5	SIX5	SIX5 (sc-55706)	EtOH_0.02pct	A549::SIX5::EtOH_0.02pct::broadPeak	0.985589	3.93156e-38
H1-hESC::SIX5::None::broadPeak	wgEncodeHaibTfbsH1hescSix5Pcr1xPkRep1	NA	broadPeak	wgEncodeHaibTfbs	H1-hESC	SIX5	SIX5	SIX5	SIX5 (sc-55706)	None	H1-hESC::SIX5::None::broadPeak	0.990688	1.09306e-05
K562::ZNF274::None::narrowPeak	wgEncodeSydhTfbsK562Znf274UcdPk	peak	narrowPeak	wgEncodeSydhTfbs	K562	ZNF274	ZNF274	ZNF274	ZNF274 (H00010782-A01)	None	K562::ZNF274::None::narrowPeak	0.992621	2.01707e-07
HepG2::TR4::None::narrowPeak	wgEncodeSydhTfbsHepg2Tr4UcdPk	peak	narrowPeak	wgEncodeSydhTfbs	HepG2	TR4	TR4	nr2c2	TR4	None	HepG2::TR4::None::narrowPeak	0.994733	4.59736e-06
K562::ZBTB33::None::broadPeak	wgEncodeHaibTfbsK562Zbtb33Pcr1xPkRep1	NA	broadPeak	wgEncodeHaibTfbs	K562	ZBTB33	ZBTB33	ZBTB33	ZBTB33 (sc-23871)	None	K562::ZBTB33::None::broadPeak	0.994745	1.42162e-06
K562::ATF3::None::narrowPeak	wgEncodeSydhTfbsK562Atf3StdPk	peak	narrowPeak	wgEncodeSydhTfbs	K562	ATF3	ATF3	ATF3	ATF3 (sc-188)	None	K562::ATF3::None::narrowPeak	0.995794	0.0398632
HeLa-S3::TR4::None::narrowPeak	wgEncodeSydhTfbsHelas3Tr4StdPk	peak	narrowPeak	wgEncodeSydhTfbs	HeLa-S3	TR4	TR4	nr2c2	TR4	None	HeLa-S3::TR4::None::narrowPeak	0.996311	0.0281349
GM12878::ZBTB33::None::broadPeak	wgEncodeHaibTfbsGm12878Zbtb33Pcr1xPkRep1	NA	broadPeak	wgEncodeHaibTfbs	GM12878	ZBTB33	ZBTB33	ZBTB33	ZBTB33 (sc-23871)	None	GM12878::ZBTB33::None::broadPeak	0.998136	2.72298e-13
HeLa-S3::GABP::None::broadPeak	wgEncodeHaibTfbsHelas3GabpPcr1xPkRep1	NA	broadPeak	wgEncodeHaibTfbs	HeLa-S3	GABP	GABP	GABPB1	GABP (sc-28312)	None	HeLa-S3::GABP::None::broadPeak	0.998959	5.31101e-16
GM12878::GABP::None::broadPeak	wgEncodeHaibTfbsGm12878GabpPcr2xPkRep1	NA	broadPeak	wgEncodeHaibTfbs	GM12878	GABP	GABP	GABPB1	GABP (sc-28312)	None	GM12878::GABP::None::broadPeak	0.999874	1.18482e-11
K562::SIX5::None::broadPeak	wgEncodeHaibTfbsK562Six5Pcr1xPkRep1	NA	broadPeak	wgEncodeHaibTfbs	K562	SIX5	SIX5	SIX5	SIX5 (sc-55706)	None	K562::SIX5::None::broadPeak	0.999944	4.43678e-07
GM12878::SIX5::None::broadPeak	wgEncodeHaibTfbsGm12878Six5Pcr1xPkRep1	NA	broadPeak	wgEncodeHaibTfbs	GM12878	SIX5	SIX5	SIX5	SIX5 (sc-55706)	None	GM12878::SIX5::None::broadPeak	0.999958	1.28963e-07
NT2-D1::YY1::None::narrowPeak	wgEncodeSydhTfbsNt2d1Yy1UcdPk	peak	narrowPeak	wgEncodeSydhTfbs	NT2-D1	YY1	YY1	YY1	YY1 (sc-1703)	None	NT2-D1::YY1::None::narrowPeak	1	7.70338e-07
K562::YY1::None::narrowPeak	wgEncodeSydhTfbsK562Yy1UcdPk	peak	narrowPeak	wgEncodeSydhTfbs	K562	YY1	YY1	YY1	YY1 (sc-1703)	None	K562::YY1::None::narrowPeak	1	8.42641e-06
