# Supplementary material for: Genome-Wide Signatures of Transcription Factor Activity: Connecting Transcription Factors, Disease, and Small Molecules
Source: PLoS Comput Biol. 2013 Sep 5;9(9):e1003198. doi: 10.1371/journal.pcbi.1003198 (PMC3764016; doi:10.1371/journal.pcbi.1003198)
Supplement: Table S5 — The genes with gene-specific concordance in the TREG ERα up-regulation signature (p-value(eg) <0.001), used for plotting heatmaps in Fig. 8 . (XLSX) [file pcbi.1003198.s010.xlsx]

## Sheet: ERalpha signatures
geneID	Symbol	Name	diffExp	Diff Exp Pvalue	ErBindingScore	ErBindingProb	TregSignature Pvalue
3860	KRT13	keratin 13	3.9914	9.64148e-14	4.58345	1	4.9724e-07
55244	SLC47A1	solute carrier family 47, member 1	3.47397	8.007e-17	0.0724923	0.000534771	0.00280642
158763	ARHGAP36	Rho GTPase activating protein 36	2.92672	3.50219e-13	2.02061e-14	0.00010251	0.0100646
114770	PGLYRP2	peptidoglycan recognition protein 2	2.74339	1.53585e-13	4.78113	1	4.9724e-07
23678	SGK3	serum/glucocorticoid regulated kinase family, member 3	2.34746	2.45695e-11	0.801108	0.333402	0.00191537
154141	MBOAT1	membrane bound O-acyltransferase domain containing 1	2.2262	7.4177e-13	3.21303	1	3.62985e-05
116362	RBP7	retinol binding protein 7, cellular	2.18075	2.36739e-13	6.11733e-13	0.00010251	0.00887077
9424	KCNK6	potassium channel, subfamily K, member 6	2.11395	1.59013e-13	3.3041	1	2.33703e-05
1591	CYP24A1	cytochrome P450, family 24, subfamily A, polypeptide 1	2.10538	1.48306e-08	9.14246e-12	0.00010251	0.0102168
5979	RET	ret proto-oncogene	1.94279	4.71435e-13	0.0437285	0.000277823	0.00312366
1952	CELSR2	cadherin, EGF LAG seven-pass G-type receptor 2 (flamingo homolog, Drosophila)	1.66804	3.03222e-12	2.64236	1	8.35364e-05
7494	XBP1	X-box binding protein 1	1.64471	5.83129e-12	9.5146e-07	0.000102512	0.00543185
283551	C14orf182	chromosome 14 open reading frame 182	1.5176	8.94671e-08	2.83064e-05	0.000102576	0.00568644
284266	SIGLEC15	sialic acid binding Ig-like lectin 15	1.49321	2.16093e-10	4.91829e-13	0.00010251	0.0102138
799	CALCR	calcitonin receptor	1.46225	1.57914e-10	0.00182513	0.000107057	0.00386654
285489	DOK7	docking protein 7	1.44638	6.96574e-12	3.77159	1	2.23758e-05
771	CA12	carbonic anhydrase XII	1.37689	1.77927e-10	2.92814	1	0.000118343
4330	MN1	meningioma (disrupted in balanced translocation) 1	1.37683	2.42092e-07	2.70308	1	0.000434588
3866	KRT15	keratin 15	1.36235	9.0042e-10	0.00964165	0.000127732	0.00367212
57475	PLEKHH1	pleckstrin homology domain containing, family H (with MyTH4 domain) member 1	1.29026	2.36183e-10	4.32288	1	1.54144e-05
51195	RAPGEFL1	Rap guanine nucleotide exchange factor (GEF)-like 1	1.28973	7.39725e-10	1.54731	1	0.000501218
54899	PXK	PX domain containing serine/threonine kinase	1.26444	1.49247e-08	4.41564e-10	0.00010251	0.00897718
7466	WFS1	Wolfram syndrome 1 (wolframin)	1.23808	1.08674e-09	2.06098e-05	0.000102558	0.0051529
9455	HOMER2	homer homolog 2 (Drosophila)	1.23662	5.748e-09	3.32034	1	0.0001442
164832	LONRF2	LON peptidase N-terminal domain and ring finger 2	1.22942	2.9226e-10	2.85353	1	0.00013873
9646	CTR9	Ctr9, Paf1/RNA polymerase II complex component, homolog (S. cerevisiae)	1.2207	9.58166e-10	0.00156454	0.000106236	0.00405798
140707	BRI3BP	BRI3 binding protein	1.2174	2.67906e-09	4.47925	1	1.74034e-05
7164	TPD52L1	tumor protein D52-like 1	1.20819	6.87625e-11	3.90994	1	2.53593e-05
347733	TUBB2B	tubulin, beta 2B class IIb	1.19515	7.26293e-07	3.4833	1	0.000244145
11057	ABHD2	abhydrolase domain containing 2	1.1926	8.0096e-10	1.6549e-12	0.00010251	0.0100756
2030	SLC29A1	solute carrier family 29 (nucleoside transporters), member 1	1.17827	2.23524e-08	2.50477	0.663355	0.00101984
6662	SOX9	SRY (sex determining region Y)-box 9	1.1686	2.58025e-10	0.014413	0.000142418	0.00352543
55540	IL17RB	interleukin 17 receptor B	1.13807	3.62316e-07	2.5421	1	0.000513649
7357	UGCG	UDP-glucose ceramide glucosyltransferase	1.13383	2.55044e-10	7.52243e-12	0.00010251	0.00934812
57535	KIAA1324	KIAA1324	1.12416	1.30645e-08	0.974898	0.600041	0.0016568
7846	TUBA1A	tubulin, alpha 1a	1.12102	1.16747e-09	3.05142	1	0.000148675
9060	PAPSS2	3'-phosphoadenosine 5'-phosphosulfate synthase 2	1.04752	7.85941e-08	1.43328	1	0.000885585
155465	AGR3	anterior gradient 3 homolog (Xenopus laevis)	1.04544	7.56586e-08	2.45822	1	0.000448014
3669	ISG20	interferon stimulated exonuclease gene 20kDa	1.04448	3.62524e-10	3.08126	1	0.000118343
8839	WISP2	WNT1 inducible signaling pathway protein 2	1.02715	2.09414e-10	2.78444e-13	0.00010251	0.0104346
9094	UNC119	unc-119 homolog (C. elegans)	1.01969	6.33567e-10	1.52833e-06	0.000102513	0.00583412
118980	SFXN2	sideroflexin 2	1.00831	3.87499e-09	1.326	1	0.000697131
2730	GCLM	glutamate-cysteine ligase, modifier subunit	0.994324	1.60187e-09	3.40897	1	0.000104918
115106	HAUS1	HAUS augmin-like complex, subunit 1	0.990648	8.7513e-08	2.79074	1	0.000357516
2288	FKBP4	FK506 binding protein 4, 59kDa	0.986027	5.39957e-10	4.16177	1	2.13813e-05
8416	ANXA9	annexin A9	0.985648	1.42724e-09	4.01667	1	3.67958e-05
645	BLVRB	biliverdin reductase B (flavin reductase (NADPH))	0.979073	3.63215e-10	4.79922	1	3.48068e-06
26287	ANKRD2	ankyrin repeat domain 2 (stretch responsive muscle)	0.936238	4.18456e-08	4.68405	1	1.59117e-05
2717	GLA	galactosidase, alpha	0.922637	2.23609e-09	3.10948	1	0.000153647
29984	RHOD	ras homolog family member D	0.914819	1.83416e-09	2.28089	1	0.000299339
56967	C14orf132	chromosome 14 open reading frame 132	0.912431	2.30992e-08	3.08625	1	0.000225747
148113	CILP2	cartilage intermediate layer protein 2	0.91072	6.96413e-08	0.000306767	0.00010323	0.00494754
135398	C6orf141	chromosome 6 open reading frame 141	0.879878	3.91151e-08	0.000263977	0.000103129	0.00489533
647024	C6orf132	chromosome 6 open reading frame 132	0.861955	3.15437e-06	4.1413e-07	0.000102511	0.00793148
60437	CDH26	cadherin 26	0.861131	8.84866e-06	1.02547	0.500053	0.00233255
7263	TST	thiosulfate sulfurtransferase (rhodanese)	0.844147	1.45316e-08	2.33847	1	0.000476356
4688	NCF2	neutrophil cytosolic factor 2	0.839074	3.25427e-07	1.1071e-08	0.00010251	0.00859032
4277	MICB	MHC class I polypeptide-related sequence B	0.83487	3.55444e-09	2.58071e-06	0.000102516	0.005946
116064	LRRC58	leucine rich repeat containing 58	0.832148	5.15874e-05	3.69065	1	0.0003784
9368	SLC9A3R1	solute carrier family 9, subfamily A (NHE3, cation proton antiporter 3), member 3 regulator 1	0.819065	3.69648e-09	0.755135	0.999599	0.000946746
94121	SYTL4	synaptotagmin-like 4	0.813442	2.70451e-06	8.53239e-08	0.00010251	0.00846303
5265	SERPINA1	serpin peptidase inhibitor, clade A (alpha-1 antiproteinase, antitrypsin), member 1	0.808124	6.70589e-05	3.86171	1	0.000321217
26064	RAI14	retinoic acid induced 14	0.799198	1.43309e-08	0.173992	0.120379	0.00294018
114904	C1QTNF6	C1q and tumor necrosis factor related protein 6	0.792344	1.80077e-07	3.68992	1	0.000152156
6478	SIAH2	siah E3 ubiquitin protein ligase 2	0.789126	6.04071e-09	2.49083	1	0.000310775
55605	KIF21A	kinesin family member 21A	0.7877	8.15786e-05	3.25082	1	0.000654368
80781	COL18A1	collagen, type XVIII, alpha 1	0.780302	2.4526e-07	0.83436	0.500051	0.00215056
5352	PLOD2	procollagen-lysine, 2-oxoglutarate 5-dioxygenase 2	0.774785	5.45006e-08	2.3335	1	0.000455969
404093	CUEDC1	CUE domain containing 1	0.773241	7.57647e-07	1.54124	1	0.00103625
4357	MPST	mercaptopyruvate sulfurtransferase	0.757043	2.31082e-07	2.21392	1	0.000573318
10312	TCIRG1	T-cell, immune regulator 1, ATPase, H+ transporting, lysosomal V0 subunit A3	0.756666	8.55911e-07	2.51124	0.892882	0.00099647
85004	RERG	RAS-like, estrogen-regulated, growth inhibitor	0.755584	7.53554e-06	3.02241	1	0.000542986
8140	SLC7A5	solute carrier family 7 (amino acid transporter light chain, L system), member 5	0.752286	7.15142e-08	0.000212942	0.000103009	0.00503754
595	CCND1	cyclin D1	0.752223	1.32004e-07	1.02294	0.999999	0.00111979
5029	P2RY2	purinergic receptor P2Y, G-protein coupled, 2	0.743664	6.00666e-07	0.00020331	0.000102987	0.005406
2296	FOXC1	forkhead box C1	0.739528	3.01549e-06	2.52666	1	0.000690667
6820	SULT2B1	sulfotransferase family, cytosolic, 2B, member 1	0.737901	5.03725e-08	1.66385	0.500073	0.00167918
9687	GREB1	growth regulation by estrogen in breast cancer 1	0.734413	8.88745e-07	3.66175	1	0.000208841
7082	TJP1	tight junction protein 1	0.733267	8.89627e-07	3.41476	1	0.000284919
7739	ZNF185	zinc finger protein 185 (LIM domain)	0.726019	8.03251e-08	3.52638	0.875013	0.000371936
3487	IGFBP4	insulin-like growth factor binding protein 4	0.72377	9.17028e-07	0.338134	0.180336	0.00294714
80714	PBX4	pre-B-cell leukemia homeobox 4	0.721297	3.152e-06	1.42573e-05	0.000102543	0.00656805
5420	PODXL	podocalyxin-like	0.718139	2.73702e-08	1.75194e-06	0.000102514	0.00638954
122970	ACOT4	acyl-CoA thioesterase 4	0.71603	1.62578e-06	0.00431508	0.000113117	0.00457362
158046	NXNL2	nucleoredoxin-like 2	0.71098	8.12503e-07	0.192754	0.00815262	0.00342101
58480	RHOU	ras homolog family member U	0.708582	6.40514e-07	1.34443	0.500051	0.00202924
2081	ERN1	endoplasmic reticulum to nucleus signaling 1	0.706602	9.36121e-06	1.55676	1	0.00130178
3055	HCK	hemopoietic cell kinase	0.700586	8.39628e-06	2.81952e-05	0.000102576	0.0065586
54498	SMOX	spermine oxidase	0.684233	2.24737e-05	0.00679238	0.000119694	0.00483914
11031	RAB31	RAB31, member RAS oncogene family	0.684061	5.47096e-07	1.47204	1	0.00103327
221178	SPATA13	spermatogenesis associated 13	0.682707	8.83214e-06	1.55961e-05	0.000102546	0.00677042
3613	IMPA2	inositol(myo)-1(or 4)-monophosphatase 2	0.676575	0.000106978	1.40688	1	0.00176918
388743	CAPN8	calpain 8	0.674817	3.23091e-06	3.55297e-05	0.000102593	0.00627418
440193	CCDC88C	coiled-coil domain containing 88C	0.672599	5.96667e-06	4.53305	1	7.50833e-05
7052	TGM2	transglutaminase 2 (C polypeptide, protein-glutamine-gamma-glutamyltransferase)	0.669708	3.80535e-05	0.893071	0.999981	0.00189846
26509	MYOF	myoferlin	0.659817	1.23036e-07	8.18227e-09	0.00010251	0.00849137
57478	USP31	ubiquitin specific peptidase 31	0.652937	3.92794e-06	4.66371	1	4.12709e-05
6510	SLC1A5	solute carrier family 1 (neutral amino acid transporter), member 5	0.652386	2.40992e-07	1.51044	0.792315	0.00138829
5272	SERPINB9	serpin peptidase inhibitor, clade B (ovalbumin), member 9	0.650332	0.000135553	2.54914	1	0.00110139
1717	DHCR7	7-dehydrocholesterol reductase	0.649389	2.9903e-07	3.42706	1	0.000230222
79980	DSN1	DSN1, MIND kinetochore complex component, homolog (S. cerevisiae)	0.648683	1.57494e-06	3.67171	1	0.000217294
2213	FCGR2B	Fc fragment of IgG, low affinity IIb, receptor (CD32)	0.648478	2.18009e-07	1.25642e-08	0.00010251	0.00845159
9540	TP53I3	tumor protein p53 inducible protein 3	0.646288	3.28609e-07	3.68889	1	0.000172542
9630	GNA14	guanine nucleotide binding protein (G protein), alpha 14	0.645697	5.79569e-06	8.00622e-09	0.00010251	0.00943862
29128	UHRF1	ubiquitin-like with PHD and ring finger domains 1	0.645256	4.58366e-07	0.11299	0.00359664	0.0034782
2055	CLN8	ceroid-lipofuscinosis, neuronal 8 (epilepsy, progressive with mental retardation)	0.644974	8.79319e-06	0.0206105	0.000164038	0.00430113
79570	NKAIN1	Na+/K+ transporting ATPase interacting 1	0.642002	4.4267e-06	1.5257e-05	0.000102546	0.00662622
6584	SLC22A5	solute carrier family 22 (organic cation/carnitine transporter), member 5	0.638731	1.85224e-06	2.72245	1	0.000552931
51002	TPRKB	TP53RK binding protein	0.637266	3.91434e-07	1.07285e-07	0.00010251	0.00793148
4665	NAB2	NGFI-A binding protein 2 (EGR1 binding protein 2)	0.63584	5.35195e-07	3.75958	1	0.000168564
7162	TPBG	trophoblast glycoprotein	0.632175	3.04522e-07	1.89987	1	0.00086122
342527	SMTNL2	smoothelin-like 2	0.630011	7.44438e-07	0.00215824	0.000107686	0.00464572
55103	RALGPS2	Ral GEF with PH domain and SH3 binding motif 2	0.629312	2.07424e-05	3.11299	1	0.000578788
7032	TFF2	trefoil factor 2	0.624805	0.000350628	3.01031	1	0.000988514
57149	LYRM1	LYR motif containing 1	0.619442	2.13824e-07	3.29033	1	0.000261051
652968	GATSL3	GATS protein-like 3	0.608691	0.000677142	3.04717	1	0.00107752
149175	MANEAL	mannosidase, endo-alpha-like	0.607558	1.62692e-05	4.00184	1	0.000204863
58495	OVOL2	ovo-like 2 (Drosophila)	0.601051	4.29606e-05	2.10817	1	0.00112575
21	ABCA3	ATP-binding cassette, sub-family A (ABC1), member 3	0.59943	3.44833e-07	2.8665	1	0.000398787
92610	TIFA	TRAF-interacting protein with forkhead-associated domain	0.594286	1.19658e-06	1.90537	1	0.00093879
54981	NMRK1	nicotinamide riboside kinase 1	0.593121	3.17067e-05	1.78234e-06	0.000102514	0.0079633
27134	TJP3	tight junction protein 3	0.590438	1.43767e-06	0.0719947	0.00136812	0.00366019
26086	GPSM1	G-protein signaling modulator 1	0.587229	1.03029e-06	1.36061	0.500051	0.00206156
4602	MYB	v-myb myeloblastosis viral oncogene homolog (avian)	0.586225	1.42306e-05	3.32574	1	0.00046492
79885	HDAC11	histone deacetylase 11	0.583642	2.74555e-05	0.839188	0.999886	0.00188404
27250	PDCD4	programmed cell death 4 (neoplastic transformation inhibitor)	0.583079	2.38315e-06	3.68777e-08	0.00010251	0.00871811
11012	KLK11	kallikrein-related peptidase 11	0.580048	1.33387e-06	3.99583e-09	0.00010251	0.00922431
23171	GPD1L	glycerol-3-phosphate dehydrogenase 1-like	0.574073	4.2047e-06	2.81483	1	0.000573318
55806	HR	hairless homolog (mouse)	0.568548	0.000386168	2.23533	1	0.00145045
283120	H19	H19, imprinted maternally expressed transcript (non-protein coding)	0.562085	1.0857e-05	8.4809e-06	0.00010253	0.00698871
7546	ZIC2	Zic family member 2	0.560094	8.61025e-06	1.85086	1	0.00116851
1154	CISH	cytokine inducible SH2-containing protein	0.559535	6.29182e-06	0.0222087	0.000170125	0.00424245
10801	2012-09-09	septin 9	0.557677	0.000104512	0.847226	0.286515	0.00288847
1632	ECI1	enoyl-CoA delta isomerase 1	0.554232	3.11156e-07	2.3266	1	0.000573318
18	ABAT	4-aminobutyrate aminotransferase	0.553178	1.66103e-06	1.03732	0.333402	0.00246035
79862	ZNF669	zinc finger protein 669	0.552988	0.000222386	4.13506	1	0.00029188
7538	ZFP36	zinc finger protein 36, C3H type, homolog (mouse)	0.552329	2.0425e-06	1.85907	1	0.00101338
55793	FAM63A	family with sequence similarity 63, member A	0.552092	4.74974e-05	4.15499	1	0.000186465
23216	TBC1D1	TBC1 (tre-2/USP6, BUB2, cdc16) domain family, member 1	0.551607	8.49595e-05	1.06514	0.400062	0.00265377
3815	KIT	v-kit Hardy-Zuckerman 4 feline sarcoma viral oncogene homolog	0.548892	4.19776e-05	0.00770377	0.000122209	0.00491522
56172	ANKH	ankylosis, progressive homolog (mouse)	0.546567	0.000194246	0.00233212	0.000108113	0.00580429
81929	SEH1L	SEH1-like (S. cerevisiae)	0.545746	9.61678e-06	2.78729	1	0.000660832
10938	EHD1	EH-domain containing 1	0.535522	1.24731e-05	2.33626	1	0.000907464
5678	PSG9	pregnancy specific beta-1-glycoprotein 9	0.53322	1.74584e-05	0.365124	0.287891	0.00294366
55552	ZNF823	zinc finger protein 823	0.531295	8.69706e-05	2.78761	1	0.000907961
602	BCL3	B-cell CLL/lymphoma 3	0.525382	1.15243e-05	0.00474404	0.000114229	0.00480831
53373	TPCN1	two pore segment channel 1	0.518298	3.11348e-05	3.71083	1	0.000345085
375449	MAST4	microtubule associated serine/threonine kinase family member 4	0.512814	1.31351e-05	0.409152	0.660518	0.00239173
51660	MPC1	mitochondrial pyruvate carrier 1	0.511159	2.45482e-05	2.29924	1	0.000998459
687	KLF9	Kruppel-like factor 9	0.510796	0.000165076	2.28748	1	0.00128487
253782	CERS6	ceramide synthase 6	0.510592	9.40326e-05	2.59409	1	0.00102332
147040	KCTD11	potassium channel tetramerisation domain containing 11	0.509692	1.88852e-05	3.70082	1	0.000318234
3783	KCNN4	potassium intermediate/small conductance calcium-activated channel, subfamily N, member 4	0.506658	1.64029e-06	0.234821	0.0208704	0.00337974
5083	PAX9	paired box 9	0.506382	0.000223799	2.46689	1	0.00124658
10861	SLC26A1	solute carrier family 26 (sulfate transporter), member 1	0.504193	0.000321654	3.59861	1	0.000603153
7869	SEMA3B	sema domain, immunoglobulin domain (Ig), short basic domain, secreted, (semaphorin) 3B	0.504081	5.56575e-06	2.79432	1	0.000613595
284098	PIGW	phosphatidylinositol glycan anchor biosynthesis, class W	0.503128	1.01061e-05	6.73548e-05	0.000102668	0.00629457
29089	UBE2T	ubiquitin-conjugating enzyme E2T (putative)	0.501688	3.78523e-06	0.0217896	0.000168507	0.00418229
79083	MLPH	melanophilin	0.50051	3.09682e-06	0.00018882	0.000102953	0.00573666
28996	HIPK2	homeodomain interacting protein kinase 2	0.498578	2.79042e-05	0.013473	0.000139397	0.00465119
1445	CSK	c-src tyrosine kinase	0.497338	1.73306e-05	0.00297875	0.00010972	0.00506688
80146	UXS1	UDP-glucuronate decarboxylase 1	0.49583	3.34537e-06	4.93902e-05	0.000102626	0.00617523
123879	DCUN1D3	DCN1, defective in cullin neddylation 1, domain containing 3 (S. cerevisiae)	0.492953	4.29623e-06	3.05225	1	0.000492765
445	ASS1	argininosuccinate synthase 1	0.491874	1.81052e-05	0.00697062	0.000120182	0.00478196
113457	TUBA3D	tubulin, alpha 3d	0.491701	0.000513159	1.03804	0.999999	0.00220725
203197	C9orf91	chromosome 9 open reading frame 91	0.49043	4.63544e-05	0.000624417	0.000103981	0.00593009
11135	CDC42EP1	CDC42 effector protein (Rho GTPase binding) 1	0.489484	0.00065634	0.682471	0.997984	0.00243697
9662	CEP135	centrosomal protein 135kDa	0.485052	0.00011487	2.71857	1	0.000975088
11001	SLC27A2	solute carrier family 27 (fatty acid transporter), member 2	0.482678	4.80405e-05	3.69059	1	0.000375914
54926	UBE2R2	ubiquitin-conjugating enzyme E2R 2	0.480758	2.12904e-05	1.92619	1	0.00123863
26353	HSPB8	heat shock 22kDa protein 8	0.477455	1.25742e-05	4.14298	1	0.00014768
64802	NMNAT1	nicotinamide nucleotide adenylyltransferase 1	0.477295	0.000116128	0.0101334	0.000129173	0.0050987
8456	FOXN1	forkhead box N1	0.47484	0.000113302	3.83536	1	0.000367958
6576	SLC25A1	solute carrier family 25 (mitochondrial carrier; citrate transporter), member 1	0.473006	1.42542e-05	0.138788	0.00302249	0.00371339
6615	SNAI1	snail homolog 1 (Drosophila)	0.47254	0.000557891	3.97481	1	0.000449505
5373	PMM2	phosphomannomutase 2	0.471647	1.57949e-05	3.49645	1	0.000384864
51473	DCDC2	doublecortin domain containing 2	0.467607	0.000171827	0.0409038	0.000381747	0.00456566
4061	LY6E	lymphocyte antigen 6 complex, locus E	0.462109	3.68429e-05	4.35958	1	0.000134255
23370	ARHGEF18	Rho/Rac guanine nucleotide exchange factor (GEF) 18	0.460918	5.67004e-06	0.35404	0.499481	0.0025757
3915	LAMC1	laminin, gamma 1 (formerly LAMB2)	0.45672	1.12823e-05	4.66075	1	5.1713e-05
9604	RNF14	ring finger protein 14	0.455182	0.000301203	2.29311	1	0.00156034
10635	RAD51AP1	RAD51 associated protein 1	0.453807	0.000948798	3.61323	1	0.000772711
2539	G6PD	glucose-6-phosphate dehydrogenase	0.450324	7.98654e-06	0.11946	0.00243572	0.00370046
4176	MCM7	minichromosome maintenance complex component 7	0.450073	6.57918e-05	3.79313e-05	0.000102599	0.00702799
155185	AMZ1	archaelysin family metallopeptidase 1	0.446533	8.24246e-05	0.00112087	0.000105166	0.00587092
23564	DDAH2	dimethylarginine dimethylaminohydrolase 2	0.441101	2.44424e-05	2.53806	1	0.000895033
8525	DGKZ	diacylglycerol kinase, zeta	0.440626	0.000140753	0.440743	0.143035	0.0032977
10311	DSCR3	Down syndrome critical region gene 3	0.438043	0.000128234	4.22648	1	0.000214311
4477	MSMB	microseminoprotein, beta-	0.436553	0.00125655	4.1125	1	0.000510169
81928	CABLES2	Cdk5 and Abl enzyme substrate 2	0.435871	8.02756e-06	4.6704	1	4.47516e-05
84445	LZTS2	leucine zipper, putative tumor suppressor 2	0.435617	5.97209e-05	1.86442	1	0.00142161
3315	HSPB1	heat shock 27kDa protein 1	0.432284	5.12241e-06	2.53614	1	0.000726965
7022	TFAP2C	transcription factor AP-2 gamma (activating enhancer binding protein 2 gamma)	0.431691	1.36567e-05	3.51898	1	0.000372433
54906	FAM208B	family with sequence similarity 208, member B	0.429296	0.000301635	3.63246	1	0.000573318
28966	SNX24	sorting nexin 24	0.428146	8.93627e-05	1.03641	0.999999	0.00194123
58489	FAM108C1	family with sequence similarity 108, member C1	0.427411	6.04253e-06	2.04617	1	0.00103028
10280	SIGMAR1	sigma non-opioid intracellular receptor 1	0.427212	0.000359222	0.659209	0.996619	0.00234747
11145	PLA2G16	phospholipase A2, group XVI	0.425052	6.29104e-05	0.0227019	0.000172063	0.00460942
97	ACYP1	acylphosphatase 1, erythrocyte (common) type	0.423422	1.32073e-05	0.0175233	0.000152887	0.00441201
652995	UCA1	urothelial cancer associated 1 (non-protein coding)	0.418545	0.000109577	4.44064	1	0.000152156
9261	MAPKAPK2	mitogen-activated protein kinase-activated protein kinase 2	0.417302	3.86906e-05	0.287984	0.0662293	0.00343494
5209	PFKFB3	6-phosphofructo-2-kinase/fructose-2,6-biphosphatase 3	0.416475	2.02885e-05	0.690879	0.500052	0.0025414
22856	CHSY1	chondroitin sulfate synthase 1	0.414529	9.76594e-06	0.933386	0.999992	0.00167172
57688	ZSWIM6	zinc finger, SWIM-type containing 6	0.413529	1.9879e-05	2.58581	1	0.000844811
83888	FGFBP2	fibroblast growth factor binding protein 2	0.412613	9.47011e-05	4.61688	1	0.000102929
10105	PPIF	peptidylprolyl isomerase F	0.411425	3.31378e-05	0.346353	0.209371	0.00310924
126006	PCP2	Purkinje cell protein 2	0.410674	8.35367e-05	1.41866	1	0.0017115
79629	OCEL1	occludin/ELL domain containing 1	0.40213	1.54897e-05	1.63803e-07	0.00010251	0.00871811
730091	LOC730091	uncharacterized LOC730091	0.401419	3.8666e-05	3.8588	1	0.000294864
55173	MRPS10	mitochondrial ribosomal protein S10	0.396704	0.000106162	0.000427381	0.000103515	0.00635324
6747	SSR3	signal sequence receptor, gamma (translocon-associated protein gamma)	0.395534	0.000125455	4.11564e-06	0.00010252	0.00814977
5052	PRDX1	peroxiredoxin 1	0.392592	1.65111e-05	1.02284	0.952521	0.00183631
56994	CHPT1	choline phosphotransferase 1	0.392054	0.000209156	5.2207	1	4.37571e-05
83879	CDCA7	cell division cycle associated 7	0.391993	0.00164084	2.16777	1	0.00193675
5174	PDZK1	PDZ domain containing 1	0.391426	0.00116842	4.16707	1	0.00043608
23082	PPRC1	peroxisome proliferator-activated receptor gamma, coactivator-related 1	0.387701	8.53327e-05	0.00363669	0.000111379	0.00541147
11022	TDRKH	tudor and KH domain containing	0.386858	0.000973121	3.40807	1	0.000928845
6723	SRM	spermidine synthase	0.384673	0.000203703	0.0140705	0.00014131	0.0051166
162	AP1B1	adaptor-related protein complex 1, beta 1 subunit	0.383984	6.13179e-05	3.1445	1	0.000668291
342184	FMN1	formin 1	0.381963	0.00207974	4.83028	1	0.0002163
6533	SLC6A6	solute carrier family 6 (neurotransmitter transporter, taurine), member 6	0.381767	0.000409097	3.07801	1	0.000963154
382	ARF6	ADP-ribosylation factor 6	0.380774	7.97057e-05	3.21083	1	0.00067028
6324	SCN1B	sodium channel, voltage-gated, type I, beta subunit	0.377467	2.7187e-05	2.2116e-05	0.000102562	0.00695589
5794	PTPRH	protein tyrosine phosphatase, receptor type, H	0.375718	0.00359008	1.86838	1	0.00247974
84937	ZNRF1	zinc and ring finger 1, E3 ubiquitin protein ligase	0.375062	9.87144e-05	3.2193	1	0.000694147
3098	HK1	hexokinase 1	0.374224	5.51305e-05	3.48013	1	0.000484312
51087	YBX2	Y box binding protein 2	0.373691	0.000343865	2.20648	1	0.00143901
5111	PCNA	proliferating cell nuclear antigen	0.371163	0.000215717	1.43051	0.500056	0.00248023
22996	TTC39A	tetratricopeptide repeat domain 39A	0.369261	0.000725983	2.19025	0.500051	0.00234747
23306	TMEM194A	transmembrane protein 194A	0.367718	0.000298739	5.32386e-05	0.000102635	0.00755905
55848	PLGRKT	plasminogen receptor, C-terminal lysine transmembrane protein	0.365136	0.00174165	0.747826	0.999528	0.00267267
4234	METTL1	methyltransferase like 1	0.361341	0.000140766	2.51455	1	0.00114266
1058	CENPA	centromere protein A	0.361151	5.06092e-05	7.64052e-07	0.000102512	0.00851027
51523	CXXC5	CXXC finger protein 5	0.360881	9.67017e-05	0.22244	0.0158494	0.00375715
11009	IL24	interleukin 24	0.356497	0.00341356	3.92774	1	0.00099647
10538	BATF	basic leucine zipper transcription factor, ATF-like	0.354755	3.21886e-05	3.74054	1	0.000333151
23555	TSPAN15	tetraspanin 15	0.354137	0.000410538	0.000649661	0.000104041	0.00669832
403	ARL3	ADP-ribosylation factor-like 3	0.353954	0.000168834	1.44628	1	0.00181294
80127	C14orf45	chromosome 14 open reading frame 45	0.352844	0.00337535	3.28244	1	0.00155139
399665	FAM102A	family with sequence similarity 102, member A	0.352417	1.42813e-05	0.0807919	0.00206929	0.0038382
8165	AKAP1	A kinase (PRKA) anchor protein 1	0.351845	0.000278301	3.85348	1	0.000437571
55224	ETNK2	ethanolamine kinase 2	0.348988	0.00154081	1.23765	1	0.00241211
80298	MTERFD3	MTERF domain containing 3	0.348456	0.000370667	3.59864	1	0.000617572
11187	PKP3	plakophilin 3	0.345808	0.00127652	2.78355	1	0.00144349
27166	PRELID1	PRELI domain containing 1	0.344722	8.896e-05	2.88562	1	0.00086122
654434	LINC00338	long intergenic non-protein coding RNA 338	0.341349	0.000228779	2.50199	1	0.00122818
10486	CAP2	CAP, adenylate cyclase-associated protein, 2 (yeast)	0.340704	0.000100209	4.61614	1	0.000104918
79693	YRDC	yrdC domain containing (E. coli)	0.340532	0.000201421	4.21231e-05	0.000102608	0.00744667
80139	ZNF703	zinc finger protein 703	0.338843	0.00311078	1.92402	1	0.00238825
2353	FOS	FBJ murine osteosarcoma viral oncogene homolog	0.338586	0.00168016	0.949301	0.999995	0.00256626
54898	ELOVL2	ELOVL fatty acid elongase 2	0.336475	0.00241108	1.53441	1	0.00244593
55191	NADSYN1	NAD synthetase 1	0.334969	0.000149783	0.39506	0.442382	0.00292924
57102	C12orf4	chromosome 12 open reading frame 4	0.334389	0.00192357	3.55861	1	0.00103625
260425	MAGI3	membrane associated guanylate kinase, WW and PDZ domain containing 3	0.332394	0.000436549	2.29658	1	0.00145045
23361	ZNF629	zinc finger protein 629	0.330823	0.000214423	2.74886	1	0.0010447
1662	DDX10	DEAD (Asp-Glu-Ala-Asp) box polypeptide 10	0.329667	0.000424697	1.9595	1	0.00170454
29072	SETD2	SET domain containing 2	0.325356	0.00137762	3.94276	1	0.000649396
50604	IL20	interleukin 20	0.325083	0.000985498	3.44693	1	0.000886082
56257	MEPCE	methylphosphate capping enzyme	0.324129	0.000454775	2.50526	1	0.001352
51559	NT5DC3	5'-nucleotidase domain containing 3	0.323463	0.00170638	2.85327	1	0.00150962
6618	SNAPC2	small nuclear RNA activating complex, polypeptide 2, 45kDa	0.32336	0.00330322	1.75317	1	0.00251256
85457	KIAA1737	KIAA1737	0.32193	0.000164038	2.88727e-05	0.000102577	0.00748396
389792	IER5L	immediate early response 5-like	0.319982	0.000379162	1.91792	1	0.0017115
657	BMPR1A	bone morphogenetic protein receptor, type IA	0.31895	0.000573764	2.41187	1	0.00145542
131583	FAM43A	family with sequence similarity 43, member A	0.318458	0.00157999	2.58655	1	0.00168167
83886	PRSS27	protease, serine 27	0.317129	0.0116726	3.52297	1	0.00357466
56652	C10orf2	chromosome 10 open reading frame 2	0.315737	0.000861323	1.11444	1	0.00227885
51218	GLRX5	glutaredoxin 5	0.309304	0.000192471	0.277806	0.0533482	0.00365074
56165	TDRD1	tudor domain containing 1	0.306607	0.00585653	3.10763	1	0.00247377
54769	DIRAS2	DIRAS family, GTP-binding RAS-like 2	0.306004	0.000903711	0.171141	0.00500974	0.00443439
23052	ENDOD1	endonuclease domain containing 1	0.305456	0.00296019	1.59969	1	0.00248769
65108	MARCKSL1	MARCKS-like 1	0.299827	0.000204293	1.41199	1	0.00188305
1997	ELF1	E74-like factor 1 (ets domain transcription factor)	0.297005	0.000330868	0.900174	0.500051	0.00273631
3727	JUND	jun D proto-oncogene	0.296286	0.000734408	4.20767	1	0.000354035
1906	EDN1	endothelin 1	0.296053	0.000224594	3.10515	1	0.000867187
8803	SUCLA2	succinate-CoA ligase, ADP-forming, beta subunit	0.293501	0.000301483	3.97694	1	0.000375914
6004	RGS16	regulator of G-protein signaling 16	0.288634	0.00261447	3.33386	1	0.00138133
10015	PDCD6IP	programmed cell death 6 interacting protein	0.287538	0.00157271	4.31914	1	0.000443041
4744	NEFH	neurofilament, heavy polypeptide	0.284933	0.0018881	3.52444	1	0.00104769
8706	B3GALNT1	beta-1,3-N-acetylgalactosaminyltransferase 1 (globoside blood group)	0.284503	0.00140611	0.440475	0.500928	0.0031709
79031	PDCL3	phosducin-like 3	0.282773	0.000449321	3.01939	1	0.00101984
6902	TBCA	tubulin folding cofactor A	0.282659	0.000432998	2.78738	1	0.00114316
29028	ATAD2	ATPase family, AAA domain containing 2	0.281329	0.00352512	2.46742	1	0.00215056
2132	EXT2	exostosin 2	0.280208	0.000852184	2.63572	1	0.00138233
85462	FHDC1	FH2 domain containing 1	0.279068	0.000670696	0.00384858	0.000111919	0.00618169
1666	DECR1	2,4-dienoyl CoA reductase 1, mitochondrial	0.27863	0.00113123	4.07349	1	0.000510169
22836	RHOBTB3	Rho-related BTB domain containing 3	0.277524	0.00156826	2.45619	1	0.00178062
286262	TPRN	taperin	0.277417	0.000417006	1.08596	1	0.00215405
29957	SLC25A24	solute carrier family 25 (mitochondrial carrier; phosphate carrier), member 24	0.276428	0.00203805	1.91001	0.500073	0.00269653
57696	DDX55	DEAD (Asp-Glu-Ala-Asp) box polypeptide 55	0.276057	0.000470244	0.00897122	0.000125794	0.00559942
23315	SLC9A8	solute carrier family 9, subfamily A (NHE8, cation proton antiporter 8), member 8	0.274666	0.00170189	3.66317	1	0.000926359
5757	PTMA	prothymosin, alpha	0.274259	0.000932774	4.16706	1	0.000387847
9120	SLC16A6	solute carrier family 16, member 6 (monocarboxylic acid transporter 7)	0.273895	0.00217016	2.42319	1	0.00195962
6196	RPS6KA2	ribosomal protein S6 kinase, 90kDa, polypeptide 2	0.271514	0.000861808	2.10005	0.500051	0.00242156
2553	GABPB1	GA binding protein transcription factor, beta subunit 1	0.270421	0.00634859	1.98762	1	0.00306151
80821	DDHD1	DDHD domain containing 1	0.269519	0.00323059	2.8713	1	0.00184327
7718	ZNF165	zinc finger protein 165	0.26332	0.00426343	2.3092	1	0.00233156
23030	KDM4B	lysine (K)-specific demethylase 4B	0.261033	0.00368744	3.38806	1	0.00150863
6817	SULT1A1	sulfotransferase family, cytosolic, 1A, phenol-preferring, member 1	0.260895	0.000976709	2.08524	0.800021	0.00218189
26136	TES	testis derived transcript (3 LIM domains)	0.259526	0.00137877	1.52082	0.500051	0.00274427
7145	TNS1	tensin 1	0.256441	0.0129907	3.74215	1	0.00357217
115	ADCY9	adenylate cyclase 9	0.254089	0.000206751	1.87685	1	0.00162647
60487	TRMT11	tRNA methyltransferase 11 homolog (S. cerevisiae)	0.253989	0.00326433	2.33784	1	0.0021799
90249	UNC5A	unc-5 homolog A (C. elegans)	0.253914	0.00274389	3.28251	1	0.00144647
4799	NFX1	nuclear transcription factor, X-box binding 1	0.253363	0.00438815	2.54747	1	0.00222316
1326	MAP3K8	mitogen-activated protein kinase kinase kinase 8	0.252748	0.00323186	2.73804	1	0.00192631
57834	CYP4F11	cytochrome P450, family 4, subfamily F, polypeptide 11	0.251915	0.0113187	4.13913	1	0.00323306
79873	NUDT18	nudix (nucleoside diphosphate linked moiety X)-type motif 18	0.251691	0.0019633	0.802749	0.999861	0.00268908
27202	GPR77	G protein-coupled receptor 77	0.249046	0.0142806	3.9271	1	0.00356869
2274	FHL2	four and a half LIM domains 2	0.249023	0.0032238	2.66262	0.750029	0.00231465
203328	SUSD3	sushi domain containing 3	0.24777	0.000501199	0.0505885	0.000324809	0.00486003
90355	C5orf30	chromosome 5 open reading frame 30	0.238752	0.00877841	2.276	1	0.00352842
79977	GRHL2	grainyhead-like 2 (Drosophila)	0.238735	0.00151339	3.74436	1	0.000817463
128989	C22orf25	chromosome 22 open reading frame 25	0.228385	0.00306262	2.75655	1	0.00188404
2621	GAS6	growth arrest-specific 6	0.227012	0.0163829	4.00813	1	0.00365472
79935	CNTD2	cyclin N-terminal domain containing 2	0.225049	0.0182196	4.42855	1	0.0035314
60386	SLC25A19	solute carrier family 25 (mitochondrial thiamine pyrophosphate carrier), member 19	0.224918	0.00430009	3.281	1	0.00171448
8273	SLC10A3	solute carrier family 10 (sodium/bile acid cotransporter family), member 3	0.220829	0.00374563	3.77306	1	0.00117597
84105	PCBD2	pterin-4 alpha-carbinolamine dehydratase/dimerization cofactor of hepatocyte nuclear factor 1 alpha (TCF1) 2	0.218619	0.00499065	2.81199	1	0.00229178
2526	FUT4	fucosyltransferase 4 (alpha (1,3) fucosyltransferase, myeloid-specific)	0.217679	0.0125062	3.0893	1	0.00393118
145781	GCOM1	GRINL1A complex locus 1	0.216838	0.00804624	4.23008	1	0.00247327
7031	TFF1	trefoil factor 1	0.216455	0.00165016	4.8626	1	0.000179007
84331	FAM195A	family with sequence similarity 195, member A	0.215685	0.00024377	2.98602	1	0.000949232
29995	LMCD1	LIM and cysteine-rich domains 1	0.215183	0.00554881	3.09033	1	0.00238079
3607	FOXK2	forkhead box K2	0.213225	0.00642257	2.99069	1	0.00263736
25976	TIPARP	TCDD-inducible poly(ADP-ribose) polymerase	0.212999	0.000105057	3.7057	1	0.000429118
283576	ZDHHC22	zinc finger, DHHC-type containing 22	0.211616	0.00646169	2.79913	1	0.00272239
957	ENTPD5	ectonucleoside triphosphate diphosphohydrolase 5	0.209807	0.0075088	3.29318	1	0.00279698
8027	STAM	signal transducing adaptor molecule (SH3 domain and ITAM motif) 1	0.208853	0.00414303	3.56957	1	0.00140918
341640	FREM2	FRAS1 related extracellular matrix protein 2	0.208628	0.0175551	3.88684	1	0.00384516
4683	NBN	nibrin	0.206275	0.0152128	4.03414	1	0.00356322
9817	KEAP1	kelch-like ECH-associated protein 1	0.200373	0.00789132	3.62095	1	0.00274029
55758	RCOR3	REST corepressor 3	0.197527	0.012133	3.50171	1	0.0036214
754	PTTG1IP	pituitary tumor-transforming 1 interacting protein	0.196068	0.00389611	2.00007	1	0.00245587
9781	RNF144A	ring finger protein 144A	0.19274	0.00242886	2.82025	1	0.00171548
1649	DDIT3	DNA-damage-inducible transcript 3	0.192647	0.00771228	1.81844	1	0.00345831
284439	SLC25A42	solute carrier family 25, member 42	0.191554	0.00261504	4.22813	1	0.00064691
840	CASP7	caspase 7, apoptosis-related cysteine peptidase	0.183073	0.0121399	4.4936	0.857158	0.00342052
57210	SLC45A4	solute carrier family 45, member 4	0.17593	0.0135305	3.37449	1	0.00386654
9166	EBAG9	estrogen receptor binding site associated, antigen, 9	0.172887	0.0156676	4.29182	1	0.00345284
64718	UNKL	unkempt homolog (Drosophila)-like	0.167295	0.00103337	2.9546	1	0.00125603
5130	PCYT1A	phosphate cytidylyltransferase 1, choline, alpha	0.166085	0.0010372	5.22346	1	3.7293e-05
4891	SLC11A2	solute carrier family 11 (proton-coupled divalent metal ion transporters), member 2	0.157121	0.00377897	2.4451	0.8889	0.00245786
11059	WWP1	WW domain containing E3 ubiquitin protein ligase 1	0.157116	0.0243566	4.56902	1	0.00378748
51295	ECSIT	ECSIT homolog (Drosophila)	0.154759	0.0177049	3.60637	1	0.00408582
9588	PRDX6	peroxiredoxin 6	0.153692	0.0165925	3.39804	1	0.00415792
333926	PPM1J	protein phosphatase, Mg2+/Mn2+ dependent, 1J	0.127231	0.00024917	2.11799	1	0.00141962
3880	KRT19	keratin 19	0.120329	0.000667314	1.83579	1	0.00188454
317648	NOP14-AS1	NOP14 antisense RNA 1	0.0936082	0.000778752	3.16933	1	0.0010273
51477	ISYNA1	inositol-3-phosphate synthase 1	0.082223	0.000487146	0.000649796	0.000104043	0.00678982
91683	SYT12	synaptotagmin XII	0.0537632	0.0128319	3.44127	1	0.0037293
57799	RAB40C	RAB40C, member RAS oncogene family	0.0508846	0.0165109	3.65446	1	0.00393814
6242	RTKN	rhotekin	0.0431619	0.00330197	2.07211	1	0.00238576
197335	WDR90	WD repeat domain 90	0.0402867	0.00645368	1.51123	1	0.00324549
